# Supplementary material for: A metagenome-level analysis of a microbial community fermenting ultra-filtered milk permeate
Source: Front Bioeng Biotechnol. 2023 May 17;11:1173656. doi: 10.3389/fbioe.2023.1173656 (PMC10263058; doi:10.3389/fbioe.2023.1173656)
Supplement: Supplementary file 2 [file Table1.XLSX]

## Sheet: Table of contents
Table	Description
S1	Description of each MAG in the non-redundant MAG library.
S2A	Amino acid sequences used in tblastn analyses	a. electron confurcating dehydrogenase (ecLDH)
S2B		b. lactose permease (lacS)
S2C		c. lactose PTS permease (LPTSP)
S2D		d. lactate permease (lacT)
S3	Summary of the predicted gene homologues within the most abundant community MAGs.
S4	Amino acid sequences for EtfBs used in phylogenetic tree generation of Figure 4.
S5	Extracellular concentrations of carbohydrates and fermentation products during bioreactor operation.
S6	Relative abundance of MAGs in all samples.
S7	Concentrations of carbohydrates, fermentation products, and volatile suspended solids summarized by functional period.
S8	Gene, pathway intermediate, and coenzyme abbreviations from Figure 3.
S9	Presence of genes relevant to reverse β-oxidation and lactic acid utilization within MAGs and genomes used for the EtfB phylogenetic tree (Figure 4).

## Sheet: Table S1
Table S1. Taxonomy, accession numbers, reactor of origin, and quality statistics of each MAG in the non-redundant MAG library. The reactor of origin describes the reactor from which the MAG was originally assembled.
Taxonomy was assigned using GTDB-Tk database tool (Chaumeil et al., 2020). Reference genome indicates the NCBI GenBank accession number of the reference genome in GTDB that is closest to the representative MAG. Further details on MAG characterization are provided elsewhere (Walters et al., 2022). N/A refers to MAGs without a closely matched reference genome. "GTDB representative" indicates that t…
Quality statistics were determined with CheckM (Parks et al., 2015).
MAG ID	MAG ID Code used in main text	NCBI genome accession number	Reactor of origin (code)	Reactor of origin description (citation)	GTDBtk taxonomy	Reference genome	Sequencing platform	No. contigs	Completeness (%)	Contamination (%)	MAG size (Mbp)	N50 (Mbp)	%GC	Mean contig length (bp)
UW_MP_ATO3_1	ATO3	JALCMG000000000	UW_MP_CSTR	Reactor described in this paper and previously (Walters et al., 2022)	d__Bacteria;p__Actinobacteriota;c__Coriobacteriia;o__Coriobacteriales;f__Atopobiaceae;g__Olsenella_B;s__	N/A	Illumina NovaSeq S4	28	97.98	0	2.45437	0.14306	61.76	87656
UW_MP_CLOS1_1	CLOS1	JAKVOI000000000	UW_MP_CSTR	Reactor described in this paper and previously (Walters et al., 2022)	d__Bacteria;p__Firmicutes_A;c__Clostridia;o__Clostridiales;f__Clostridiaceae;g__Clostridium_B;s__	N/A	PacBio Sequel II	1	99.83	0	3.56718	3.56718	34.99	3567184
UW_MP_ACT2_1	ACT2	JALCMY000000000	UW_MP_CSTR	Reactor described in this paper and previously (Walters et al., 2022)	d__Bacteria;p__Actinobacteriota;c__Actinomycetia;o__Actinomycetales;f__Actinomycetaceae;g__Pauljensenia;s__	N/A	Illumina NovaSeq S4	40	96.68	4.1	2.98809	0.118735	70.47	74702
UW_MP_LCO1_1	LCO1	JAKVOQ000000000	UW_MP_CSTR	Reactor described in this paper and previously (Walters et al., 2022)	d__Bacteria;p__Firmicutes_A;c__Clostridia;o__Lachnospirales;f__Lachnospiraceae;g__Agathobacter;s__Agathobacter rectalis	GCF_000020605.1	PacBio Sequel II	4	99.3	0.24	3.24569	1.63055	41.88	811422
UW_MP_BIF2_1	BIF2	JAKVOD000000000	UW_MP_USB	UFMP-fed upflow sludge blanket bioreactor (Walters et al., 2022)	d__Bacteria;p__Actinobacteriota;c__Actinomycetia;o__Actinomycetales;f__Bifidobacteriaceae;g__Bifidobacterium;s__Bifidobacterium tibiigranuli	GCF_009371885.1	PacBio Sequel II	3	99.12	4.36	3.09998	3.07615	60.62	1033327
UW_MP_SPH2_1	SPH2	JAKVOV000000000	UW_MP_CSTR	Reactor described in this paper and previously (Walters et al., 2022)	d__Bacteria;p__Spirochaetota;c__Spirochaetia;o__Sphaerochaetales;f__Sphaerochaetaceae;g__RUG023;s__	N/A	PacBio Sequel II	20	97.63	2.3	2.47181	0.189101	55.93	123590
UW_MP_BIF11_1	BIF11	JALCMO000000000	UW_MP_CSTR	Reactor described in this paper and previously (Walters et al., 2022)	d__Bacteria;p__Actinobacteriota;c__Actinomycetia;o__Actinomycetales;f__Bifidobacteriaceae;g__Bifidobacterium;s__Bifidobacterium tibiigranuli	GCF_009371885.1	Illumina NovaSeq S4	17	94.88	2.88	2.70594	0.30761	60.56	159172
UW_MP_ATO6_1	ATO6	JALCSG000000000	UW_MP_CSTR	Reactor described in this paper and previously (Walters et al., 2022)	d__Bacteria;p__Actinobacteriota;c__Coriobacteriia;o__Coriobacteriales;f__Atopobiaceae;g__Olsenella_B;s__Olsenella_B sp900119625	GCF_900119625.1	Illumina NovaSeq S4	17	84.95	0	1.81821	0.502362	62.65	106953
UW_MP_BIF18_1	BIF18	JALCUC000000000	UW_MP_CSTR	Reactor described in this paper and previously (Walters et al., 2022)	d__Bacteria;p__Actinobacteriota;c__Actinomycetia;o__Actinomycetales;f__Bifidobacteriaceae;g__Bifidobacterium;s__Bifidobacterium thermophilum	GCF_000771265.1	Illumina NovaSeq S4	63	87.44	0.95	1.80203	0.037474	60.48	28603
UW_MP_ACID1_1	ACID1	JAKVOM000000000	UW_MP_CSTR	Reactor described in this paper and previously (Walters et al., 2022)	d__Bacteria;p__Firmicutes_C;c__Negativicutes;o__Acidaminococcales;f__Acidaminococcaceae;g__Acidaminococcus;s__	N/A	PacBio Sequel II	1	100	0.6	3.05704	3.05704	48.11	3057042
UW_MP_ACT1_1		JALCUH000000000	UW_MP_CSTR	Reactor described in this paper and previously (Walters et al., 2022)	d__Bacteria;p__Actinobacteriota;c__Actinomycetia;o__Actinomycetales;f__Actinomycetaceae;g__Ancrocorticia;s__	N/A	Illumina NovaSeq S4	16	99.58	0.84	2.22845	0.216637	58.1	139278
UW_MP_ATO5_1		JAKVOX000000000	UW_MP_CSTR	Reactor described in this paper and previously (Walters et al., 2022)	d__Bacteria;p__Actinobacteriota;c__Coriobacteriia;o__Coriobacteriales;f__Atopobiaceae;g__UBA7748;s__UBA7748 sp900314535	GCA_900314535.1	PacBio Sequel II	35	91.13	0.81	2.44848	0.106535	60.47	69956
UW_MP_BIF14_1		JALCDA000000000	UW_MP_USB	UFMP-fed upflow sludge blanket bioreactor (Walters et al., 2022)	d__Bacteria;p__Actinobacteriota;c__Actinomycetia;o__Actinomycetales;f__Bifidobacteriaceae;g__Bifidobacterium;s__Bifidobacterium subtile	GCF_000741775.1	Illumina Novaseq S4	50	89.48	3.03	2.18612	0.06013	61.15	43722
UW_MP_BIF9_1		JALCUM000000000	UW_MP_CSTR	Reactor described in this paper and previously (Walters et al., 2022)	d__Bacteria;p__Actinobacteriota;c__Actinomycetia;o__Actinomycetales;f__Bifidobacteriaceae;g__Bifidobacterium;s__Bifidobacterium tibiigranuli	GCF_009371885.1	Illumina NovaSeq S4	10	94.82	2.58	2.66865	0.711551	60.56	266864
UW_MP_BACTE5_1		JALCSF000000000	UW_MP_CSTR	Reactor described in this paper and previously (Walters et al., 2022)	d__Bacteria;p__Bacteroidota;c__Bacteroidia;o__Bacteroidales;f__UBA932;g__RC9;s__RC9 sp900316045	GCA_900316045.1	Illumina NovaSeq S4	27	91.43	0.95	2.92578	0.192017	48.28	108362
UW_MP_BACTE1_1		JAKVOP000000000	UW_MP_CSTR	Reactor described in this paper and previously (Walters et al., 2022)	d__Bacteria;p__Bacteroidota;c__Bacteroidia;o__Bacteroidales;f__UBA932;g__RC9;s__RC9 sp900316045	GCA_900316045.1	PacBio Sequel II	4	96.9	1.19	3.24237	0.880316	49.02	810591
UW_MP_ANA1_1		JAKVOJ000000000	UW_MP_CSTR	Reactor described in this paper and previously (Walters et al., 2022)	d__Bacteria;p__Firmicutes_A;c__Clostridia;o__Peptostreptococcales;f__Anaerovoracaceae;g__Eubacterium_T;s__	GCF_900766045.1	PacBio Sequel II	1	100	0	2.56318	2.56318	49.81	2563185
UW_MP_BACTE2_1		JALCMW000000000	UW_MP_CSTR	Reactor described in this paper and previously (Walters et al., 2022)	d__Bacteria;p__Bacteroidota;c__Bacteroidia;o__Bacteroidales;f__UBA932;g__RC9;s__	N/A	Illumina NovaSeq S4	16	95.24	1.19	2.42638	0.33801	43.72	151648
UW_MP_BIF4_1		JALCOB000000000	UW_MP_CSTR	Reactor described in this paper and previously (Walters et al., 2022)	d__Bacteria;p__Actinobacteriota;c__Actinomycetia;o__Actinomycetales;f__Bifidobacteriaceae;g__Bifidobacterium;s__Bifidobacterium crudilactis	GCF_000738005.1	Illumina NovaSeq S4	3	98.32	1.82	2.25308	1.38241	57.75	751026
UW_MP_ENTER4_1		JALCMA000000000	UW_MP_CSTR	Reactor described in this paper and previously (Walters et al., 2022)	d__Bacteria;p__Proteobacteria;c__Gammaproteobacteria;o__Enterobacterales;f__Enterobacteriaceae;g__Citrobacter;s__Citrobacter braakii	GCF_002075345.1	Illumina NovaSeq S4	34	98.4	0.71	4.92381	0.217383	52.05	144818
UW_MP_ATO4_1		JAKVON000000000	UW_MP_CSTR	Reactor described in this paper and previously (Walters et al., 2022)	d__Bacteria;p__Actinobacteriota;c__Coriobacteriia;o__Coriobacteriales;f__Atopobiaceae;g__;s__	N/A	PacBio Sequel II	33	93.71	4.95	2.61094	0.136653	66.33	79119
UW_MP_BACIL8_1		JALCRU000000000	UW_MP_CSTR	Reactor described in this paper and previously (Walters et al., 2022)	d__Bacteria;p__Firmicutes;c__Bacilli;o__RF39;f__UBA660;g__CAG-451;s__CAG-451 sp000438295	GCA_000438295.1	Illumina NovaSeq S4	36	80.34	1.69	1.07297	0.043768	27.87	29804
UW_MP_BIF8_1		JALCNP000000000	UW_MP_CSTR	Reactor described in this paper and previously (Walters et al., 2022)	d__Bacteria;p__Actinobacteriota;c__Actinomycetia;o__Actinomycetales;f__Bifidobacteriaceae;g__Bifidobacterium;s__	N/A	Illumina NovaSeq S4	33	98.57	2.2	2.36663	0.099065	61.82	71715
UW_MP_ENTER2_1		JALCCX000000000	UW_MP_USB	UFMP-fed upflow sludge blanket bioreactor (Walters et al., 2022)	d__Bacteria;p__Proteobacteria;c__Gammaproteobacteria;o__Enterobacterales;f__Enterobacteriaceae;g__Serratia;s__Serratia liquefaciens	GCF_000422085.1	Illumina NovaSeq S4	22	98.21	0.56	5.14666	0.47896	55.51	233939
UW_MP_LIQLAC2_1		JALCMK000000000	UW_MP_CSTR	Reactor described in this paper and previously (Walters et al., 2022)	d__Bacteria;p__Firmicutes;c__Bacilli;o__Lactobacillales;f__Lactobacillaceae;g__Liquorilactobacillus;s__Liquorilactobacillus nagelii	GCF_001434225.1	Illumina NovaSeq S4	32	95.29	0	2.0318	0.093162	36.88	63493
UW_MP_BUL2_1		JALCTL000000000	UW_MP_CSTR	Reactor described in this paper and previously (Walters et al., 2022)	d__Bacteria;p__Firmicutes;c__Bacilli;o__Erysipelotrichales;f__Erysipelotrichaceae;g__Bulleidia;s__Bulleidia massiliensis_B	GCF_900290205.1	Illumina NovaSeq S4	54	94.29	0.32	2.41787	0.062691	50.13	44775
UW_MP_BACIL1_1		JAKVOY000000000	UW_MP_CSTR	Reactor described in this paper and previously (Walters et al., 2022)	d__Bacteria;p__Firmicutes;c__Bacilli;o__RFN20;f__CAG-826;g__UBA4951;s__UBA4951 sp002397465	GCA_002397465.1	PacBio Sequel II	1	97.75	1.12	1.62758	1.62758	48.36	1627576
UW_DM_ACUT3_1		JALCPO000000000	UW_DM	Dairy manure hydrolysate fed bioreactor (Ingle et al., 2022)	d__Bacteria;p__Firmicutes_A;c__Clostridia;o__Oscillospirales;f__Acutalibacteraceae;g__Caprobacter;s__	N/A	Illumina Novaseq S4	81	94.07	0.67	2.11054	0.035769	58.11	26056
UW_TS_PREV2_1		JALCDQ000000000	UW_TS	Starch-ethanol thin stillage fed bioreactor (Fortney et al., 2022)	d__Bacteria;p__Bacteroidota;c__Bacteroidia;o__Bacteroidales;f__Bacteroidaceae;g__Prevotella;s__	N/A	Illumina NovaSeq S4	33	89.46	0.91	2.56217	0.205266	43.6	77641
UW_MP_SPH1_1		JAKVOU000000000	UW_MP_CSTR	Reactor described in this paper and previously (Walters et al., 2022)	d__Bacteria;p__Spirochaetota;c__Spirochaetia;o__Sphaerochaetales;f__Sphaerochaetaceae;g__RZYO01;s__	N/A	PacBio Sequel II	3	98.85	0	3.46752	3.40879	44.42	1155839
UW_MP_SCHLAC1_1		JALCNU000000000	UW_MP_CSTR	Reactor described in this paper and previously (Walters et al., 2022)	d__Bacteria;p__Firmicutes;c__Bacilli;o__Lactobacillales;f__Lactobacillaceae;g__Schleiferilactobacillus;s__Schleiferilactobacillus harbinensis	GCF_000425885.1	Illumina NovaSeq S4	16	98.69	1.05	3.13133	0.307757	53.48	195708
UW_MP_ENTER1_1		JALCNN000000000	UW_MP_CSTR	Reactor described in this paper and previously (Walters et al., 2022)	d__Bacteria;p__Proteobacteria;c__Gammaproteobacteria;o__Enterobacterales;f__Enterobacteriaceae;g__Ewingella;s__Ewingella americana	GCF_000735345.1	Illumina NovaSeq S4	10	97.7	0.25	4.88249	0.76716	53.86	488248
UW_MP_BACIL6_1		JALCSW000000000	UW_MP_CSTR	Reactor described in this paper and previously (Walters et al., 2022)	d__Bacteria;p__Firmicutes;c__Bacilli;o__RFN20;f__CAG-826;g__UBA4951;s__	N/A	Illumina Novaseq S4	4	79.78	0	1.28995	0.504483	54.5	322486
UW_MP_LCO2_1		JALCLY000000000	UW_MP_CSTR	Reactor described in this paper and previously (Walters et al., 2022)	d__Bacteria;p__Firmicutes_A;c__Clostridia;o__Lachnospirales;f__Lachnospiraceae;g__Eubacterium_I;s__Eubacterium_I sp000270305	GCF_000270305.1	Illumina NovaSeq S4	32	97.99	1.15	2.50934	0.109722	51.11	78416
UW_DM_BACTE1_1		JALCKZ000000000	UW_DM - Inoculant	Dairy manure hydrolysate fed bioreactor (Ingle et al., 2022)	d__Bacteria;p__Bacteroidota;c__Bacteroidia;o__Bacteroidales;f__UBA932;g__UBA1232;s__	N/A	PacBio Sequel II	1	95.86	0.48	2.22901	2.22901	40.66	2229011
UW_MP_ACID2_1		JAKVOW000000000	UW_MP_CSTR	Reactor described in this paper and previously (Walters et al., 2022)	d__Bacteria;p__Firmicutes_C;c__Negativicutes;o__Acidaminococcales;f__Acidaminococcaceae;g__;s__	N/A	PacBio Sequel II	18	95.76	6.59	2.32653	0.193503	40.58	129251
UW_MP_LEUC1_1		JAKVOL000000000	UW_MP_CSTR	Reactor described in this paper and previously (Walters et al., 2022)	d__Bacteria;p__Firmicutes;c__Bacilli;o__Lactobacillales;f__Lactobacillaceae;g__Leuconostoc;s__Leuconostoc mesenteroides	GCF_000014445.1	PacBio Sequel II	1	99.74	0	1.85604	1.85604	37.88	1856045
UW_MP_LIQLAC1_1		JALCLK000000000	UW_MP_USB	UFMP-fed upflow sludge blanket bioreactor (Walters et al., 2022)	d__Bacteria;p__Firmicutes;c__Bacilli;o__Lactobacillales;f__Lactobacillaceae;g__Liquorilactobacillus;s__Liquorilactobacillus nagelii	GCF_001434225.1	PacBio Sequel II	1	98.95	1.31	2.44657	2.44657	36.85	2446573
UW_MP_OSCL3_1		JALCSB000000000	UW_MP_CSTR	Reactor described in this paper and previously (Walters et al., 2022)	d__Bacteria;p__Firmicutes_A;c__Clostridia;o__Oscillospirales;f__Oscillospiraceae;g__Intestinimonas;s__	N/A	Illumina Novaseq S4	28	89.09	0.34	2.05363	0.113074	53.79	73343
UW_DM_BURK1_1		JAKVPB000000000	UW_DM	Dairy manure hydrolysate fed bioreactor (Ingle et al., 2022)	d__Bacteria;p__Proteobacteria;c__Gammaproteobacteria;o__Burkholderiales;f__Burkholderiaceae;g__Mesosutterella;s__Mesosutterella multiformis	GCF_003402575.1	PacBio Sequel II	1	97.5	0	1.92271	1.92271	57.22	1922705
UW_TS_PREV1_1		JAKVNH000000000	UW_TS	Starch-ethanol thin stillage fed bioreactor (Fortney et al., 2022)	d__Bacteria;p__Bacteroidota;c__Bacteroidia;o__Bacteroidales;f__Bacteroidaceae;g__Prevotella;s__Prevotella sp002409785	GCA_002409785.1	PacBio Sequel II	1	97.97	1.94	3.1709	3.1709	44.33	3170899
UW_MP_PREV6_1		JAKVNZ000000000	UW_MP_USB	UFMP-fed upflow sludge blanket bioreactor (Walters et al., 2022)	d__Bacteria;p__Bacteroidota;c__Bacteroidia;o__Bacteroidales;f__Bacteroidaceae;g__Prevotella;s__Prevotella sp002409785	GCA_002409785.1	PacBio Sequel II	24	82.21	1.71	2.42031	0.116585	44.74	100846
UW_MP_BACIL2_1		JAKVOO000000000	UW_MP_CSTR	Reactor described in this paper and previously (Walters et al., 2022)	d__Bacteria;p__Firmicutes;c__Bacilli;o__RFN20;f__CAG-826;g__UBA7706;s__	N/A	PacBio Sequel II	2	98.31	0	1.49734	1.48198	37.91	748672
UW_TS_ATO2_1		JAKVMH000000000	UW_TS	Starch-ethanol thin stillage fed bioreactor (Fortney et al., 2022)	d__Bacteria;p__Actinobacteriota;c__Coriobacteriia;o__Coriobacteriales;f__Atopobiaceae;g__UBA7748;s__UBA7748 sp900314535	GCA_900314535.1	PacBio Sequel II	6	99.19	0	2.52371	1.26322	60.03	420618
UW_MP_BIF16_1		JALCLS000000000	UW_MP_CSTR	Reactor described in this paper and previously (Walters et al., 2022)	d__Bacteria;p__Actinobacteriota;c__Actinomycetia;o__Actinomycetales;f__Bifidobacteriaceae;g__Bifidobacterium;s__Bifidobacterium crudilactis	GCF_000738005.1	Illumina NovaSeq S4	84	90.81	2.23	1.95674	0.026613	57.94	23294
UW_MP_BACTE7_1		JAKVOZ000000000	UW_MP_CSTR	Reactor described in this paper and previously (Walters et al., 2022)	d__Bacteria;p__Bacteroidota;c__Bacteroidia;o__Bacteroidales;f__P3;g__;s__	N/A	PacBio Sequel II	23	91.84	0	1.88108	0.150616	29.65	81786
UW_MP_BIF5_1		JALCTS000000000	UW_MP_CSTR	Reactor described in this paper and previously (Walters et al., 2022)	d__Bacteria;p__Actinobacteriota;c__Actinomycetia;o__Actinomycetales;f__Bifidobacteriaceae;g__Bifidobacterium;s__Bifidobacterium crudilactis	GCF_000738005.1	Illumina NovaSeq S4	25	99.23	1.93	2.31349	0.143116	57.52	92539
UW_MP_LCO5_1		JALCRM000000000	UW_MP_CSTR	Reactor described in this paper and previously (Walters et al., 2022)	d__Bacteria;p__Firmicutes_A;c__Clostridia;o__Lachnospirales;f__Lachnospiraceae;g__CAG-791;s__	N/A	Illumina NovaSeq S4	27	84.34	0	2.66989	0.16572	55	98884
UW_MP_ATO1_1		JALCLV000000000	UW_MP_CSTR	Reactor described in this paper and previously (Walters et al., 2022)	d__Bacteria;p__Actinobacteriota;c__Coriobacteriia;o__Coriobacteriales;f__Atopobiaceae;g__;s__	N/A	Illumina Novaseq S4	3	100	0	2.02467	1.14992	65.21	674890
UW_MP_BIF6_1		JALCUB000000000	UW_MP_CSTR	Reactor described in this paper and previously (Walters et al., 2022)	d__Bacteria;p__Actinobacteriota;c__Actinomycetia;o__Actinomycetales;f__Bifidobacteriaceae;g__Bifidobacterium;s__Bifidobacterium psychraerophilum	GCF_000741705.1	Illumina Novaseq S4	22	98.41	1.97	2.49351	0.218031	59.17	113341
UW_MP_BIF1_1		JALCSS000000000	UW_MP_CSTR	Reactor described in this paper and previously (Walters et al., 2022)	d__Bacteria;p__Actinobacteriota;c__Actinomycetia;o__Actinomycetales;f__Bifidobacteriaceae;g__Bifidobacterium;s__Bifidobacterium breve	GCF_001025175.1	Illumina Novaseq S4	4	100	0	2.18236	1.12847	58.78	545590
UW_MP_ACET1_1		JALCMR000000000	UW_MP_CSTR	Reactor described in this paper and previously (Walters et al., 2022)	d__Bacteria;p__Proteobacteria;c__Alphaproteobacteria;o__Acetobacterales;f__Acetobacteraceae;g__Acetobacter;s__Acetobacter lovaniensis	GCF_014207635.1	Illumina Novaseq S4	15	96.02	0	2.16311	0.221985	58.91	144207
UW_MP_RUM1_1		JALCRP000000000	UW_MP_CSTR	Reactor described in this paper and previously (Walters et al., 2022)	d__Bacteria;p__Firmicutes_A;c__Clostridia;o__Oscillospirales;f__Ruminococcaceae;g__Faecalibacterium;s__	N/A	Illumina NovaSeq S4	35	93.88	0	2.21773	0.104752	56.48	63363
UW_MP_LAC2_1		JALCLZ000000000	UW_MP_CSTR	Reactor described in this paper and previously (Walters et al., 2022)	d__Bacteria;p__Firmicutes;c__Bacilli;o__Lactobacillales;f__Lactobacillaceae;g__Lactobacillus;s__Lactobacillus delbrueckii	GCF_001433875.1	Illumina Novaseq S4	49	90.15	0.22	1.51229	0.038263	50.82	30863
UW_MP_ANA3_1		JALCTF000000000	UW_MP_CSTR	Reactor described in this paper and previously (Walters et al., 2022)	d__Bacteria;p__Firmicutes_A;c__Clostridia;o__Peptostreptococcales;f__Anaerovoracaceae;g__Eubacterium_T;s__Eubacterium_T saphenum_A	GCA_004555725.1	Illumina Novaseq S4	92	76.9	0	1.86693	0.02441	50.07	20292
UW_TS_ATO3_1		JAKVMI000000000	UW_TS	Starch-ethanol thin stillage fed bioreactor (Fortney et al., 2022)	d__Bacteria;p__Actinobacteriota;c__Coriobacteriia;o__Coriobacteriales;f__Atopobiaceae;g__Olsenella;s__Olsenella sp003862195	GCA_003862195.1	PacBio Sequel II	3	98.39	0	2.33266	1.01815	65.43	777554
UW_MP_PREV3_1		JAKVOT000000000	UW_MP_CSTR	Reactor described in this paper and previously (Walters et al., 2022)	d__Bacteria;p__Bacteroidota;c__Bacteroidia;o__Bacteroidales;f__Bacteroidaceae;g__Prevotella;s__Prevotella sp900316015	GCA_900316015.1	PacBio Sequel II	6	94.29	1.07	3.45918	0.928859	46.93	576529
UW_SG_COR2		QOUO00000000	UW_SG	Cellulosic ethanol thin stillage fed bioreactor (Scarborough et al., 2018a)	d__Bacteria; p__Actinobacteriota; c__Coriobacteriia; o__Coriobacteriales; f__Atopobiaceae; g__Parafannyhessea; s__Parafannyhessea sp003862195	GTDB representative	Illumina Novaseq S4	157	100	1.61	2.42285	0.034678	64.79	15425
UW_MP_ENTER5_1		JALCNW000000000	UW_MP_CSTR	Reactor described in this paper and previously (Walters et al., 2022)	d__Bacteria;p__Proteobacteria;c__Gammaproteobacteria;o__Enterobacterales;f__Enterobacteriaceae;g__Lelliottia;s__	N/A	Illumina NovaSeq S4	116	94.44	1.07	4.58012	0.05127	52.82	39483
UW_MP_ACUT1_1		JAKVOA000000000	UW_MP_USB	UFMP-fed upflow sludge blanket bioreactor (Walters et al., 2022)	d__Bacteria;p__Firmicutes_A;c__Clostridia;o__Oscillospirales;f__Acutalibacteraceae;g__UBA4871;s__	N/A	PacBio Sequel II	2	98.66	0	2.46738	1.82266	50.56	1233690
UW_MP_STREP1_1		JALCTW000000000	UW_MP_CSTR	Reactor described in this paper and previously (Walters et al., 2022)	d__Bacteria;p__Firmicutes;c__Bacilli;o__Lactobacillales;f__Streptococcaceae;g__Lactococcus;s__Lactococcus lactis	GCF_900099625.1	Illumina Novaseq S4	67	98.71	0.57	2.274	0.039112	35.04	33940
UW_MP_ACID3_1		JALCSI000000000	UW_MP_CSTR	Reactor described in this paper and previously (Walters et al., 2022)	d__Bacteria;p__Firmicutes_C;c__Negativicutes;o__Acidaminococcales;f__Acidaminococcaceae;g__Succiniclasticum;s__Succiniclasticum sp900314855	GCA_900314855.1	Illumina Novaseq S4	31	95.09	0	1.76921	0.070665	59.67	57071
UW_MP_SACCH1_1		JAKVLB000000000	UW_MP_USB	UFMP-fed upflow sludge blanket bioreactor (Walters et al., 2022)	d__Bacteria;p__Firmicutes_A;c__Clostridia;o__Saccharofermentanales;f__Saccharofermentanaceae;g__Saccharofermentans;s__	N/A	Illumina NovaSeq S4	12	99.65	0	1.92293	0.226536	46.69	160244
UW_MP_SPOR1_1		JALCNT000000000	UW_MP_CSTR	Reactor described in this paper and previously (Walters et al., 2022)	d__Bacteria;p__Firmicutes;c__Bacilli;o__Bacillales_G;f__Sporolactobacillaceae;g__Sporolactobacillus;s__Sporolactobacillus sp900543345	GCA_900543345.1	Illumina NovaSeq S4	39	96.74	1.94	3.63612	0.114333	49.12	93233
UW_MP_LCO4_1		JALCTJ000000000	UW_MP_CSTR	Reactor described in this paper and previously (Walters et al., 2022)	d__Bacteria;p__Firmicutes_A;c__Clostridia;o__Lachnospirales;f__Lachnospiraceae;g__Eubacterium_H;s__Eubacterium_H sp003488475	GCA_003488475.1	Illumina NovaSeq S4	25	89.17	0.64	1.90701	0.135648	50.51	76280
UW_MP_BACTE6_1		JALCST000000000	UW_MP_CSTR	Reactor described in this paper and previously (Walters et al., 2022)	d__Bacteria;p__Bacteroidota;c__Bacteroidia;o__Bacteroidales;f__UBA932;g__;s__	N/A	Illumina Novaseq S4	23	91.79	0	2.18467	0.13854	48.43	94985
UW_TS_ATO1_1		JAKVMV000000000	UW_TS	Starch-ethanol thin stillage fed bioreactor (Fortney et al., 2022)	d__Bacteria;p__Actinobacteriota;c__Coriobacteriia;o__Coriobacteriales;f__Atopobiaceae;g__;s__	GCA_902795635.1	Illumina Novaseq S4	1	99.85	0	1.88781	1.88781	67.42	1887808
UW_MP_BACTE8_1		JALCRT000000000	UW_MP_CSTR	Reactor described in this paper and previously (Walters et al., 2022)	d__Bacteria;p__Bacteroidota;c__Bacteroidia;o__Bacteroidales;f__UBA932;g__RC9;s__RC9 sp000432515	GCA_000432515.1	Illumina Novaseq S4	109	80.01	1.9	2.39164	0.02505	49.15	21941
UW_MP_MUR1_1		JAKVKZ000000000	UW_MP_USB	UFMP-fed upflow sludge blanket bioreactor (Walters et al., 2022)	d__Bacteria;p__Bacteroidota;c__Bacteroidia;o__Bacteroidales;f__Muribaculaceae;g__;s__	N/A	Illumina NovaSeq S4	93	85.97	0.57	2.94834	0.03942	44.63	31702
UW_DM_ATO2_1		JALCPM000000000	UW_DM	Dairy manure hydrolysate fed bioreactor (Ingle et al., 2022)	d__Bacteria;p__Actinobacteriota;c__Coriobacteriia;o__Coriobacteriales;f__Atopobiaceae;g__Olegusella;s__Olegusella sp002407925	GCA_002407925.1	Illumina Novaseq S4	9	95.16	0	1.60962	0.356376	53.87	178847
UW_MP_MEG2_1		JALCNL000000000	UW_MP_CSTR	Reactor described in this paper and previously (Walters et al., 2022)	d__Bacteria;p__Firmicutes_C;c__Negativicutes;o__Veillonellales;f__Megasphaeraceae;g__Megasphaera_A;s__	GCF_900103535.1	Illumina Novaseq S4	97	89.24	1.4	2.09688	0.028348	39.79	21617
UW_MP_METH1_1		JALCSP000000000	UW_MP_CSTR	Reactor described in this paper and previously (Walters et al., 2022)	d__Archaea;p__Thermoplasmatota;c__Thermoplasmata;o__Methanomassiliicoccales;f__Methanomethylophilaceae;g__Methanomethylophilus;s__Methanomethylophilus sp001481295	GCF_001481295.1	Illumina NovaSeq S4	9	98.39	0.81	1.74374	0.389392	60.47	193748
UW_DM_MEG1_1		JAKVPG000000000	UW_DM	Dairy manure hydrolysate fed bioreactor (Ingle et al., 2022)	d__Bacteria;p__Firmicutes_C;c__Negativicutes;o__Veillonellales;f__Megasphaeraceae;g__Megasphaera;s__Megasphaera sp000417505	GCF_000417505.1	PacBio Sequel II	1	100	0	2.38552	2.38552	53.63	2385522
UW_MP_BACIL3_1		JALCRV000000000	UW_MP_CSTR	Reactor described in this paper and previously (Walters et al., 2022)	d__Bacteria;p__Firmicutes;c__Bacilli;o__RFN20;f__CAG-288;g__UBA6879;s__	N/A	Illumina Novaseq S4	20	97.75	1.5	2.09352	0.166297	43.26	104675
UW_MP_STREP3_1		JALCNS000000000	UW_MP_CSTR	Reactor described in this paper and previously (Walters et al., 2022)	d__Bacteria;p__Firmicutes;c__Bacilli;o__Lactobacillales;f__Streptococcaceae;g__Lactococcus;s__Lactococcus lactis_E	GCF_002078765.2	Illumina Novaseq S4	39	91.32	0	2.10215	0.088055	35.74	53901
UW_MP_BURK2_1		JALCNG000000000	UW_MP_CSTR	Reactor described in this paper and previously (Walters et al., 2022)	d__Bacteria;p__Proteobacteria;c__Gammaproteobacteria;o__Burkholderiales;f__Burkholderiaceae;g__Achromobacter;s__Achromobacter ruhlandii	GCF_902859695.1	Illumina Novaseq S4	141	97.25	0.23	5.8687	0.058032	67.94	41621
UW_MP_ANA2_1		JALCRY000000000	UW_MP_CSTR	Reactor described in this paper and previously (Walters et al., 2022)	d__Bacteria;p__Firmicutes_A;c__Clostridia;o__Peptostreptococcales;f__Anaerovoracaceae;g__;s__	N/A	Illumina Novaseq S4	70	89.61	0.35	2.33001	0.039452	48.63	33285
UW_MP_BACTE3_1		JALCME000000000	UW_MP_CSTR	Reactor described in this paper and previously (Walters et al., 2022)	d__Bacteria;p__Bacteroidota;c__Bacteroidia;o__Bacteroidales;f__Bacteroidaceae;g__Bacteroides;s__	N/A	Illumina Novaseq S4	42	94.42	1.63	4.26021	0.150155	39.97	101433
UW_MP_BIF7_1		JALCCR000000000	UW_MP_USB	UFMP-fed upflow sludge blanket bioreactor (Walters et al., 2022)	d__Bacteria;p__Actinobacteriota;c__Actinomycetia;o__Actinomycetales;f__Bifidobacteriaceae;g__Bifidobacterium;s__Bifidobacterium crudilactis	GCF_000738005.1	Illumina NovaSeq S4	16	99.17	1.67	2.31989	0.227897	57.69	144993
UW_MP_CARN1_1		JALCNO000000000	UW_MP_CSTR	Reactor described in this paper and previously (Walters et al., 2022)	d__Bacteria;p__Firmicutes;c__Bacilli;o__Lactobacillales;f__Carnobacteriaceae;g__Carnobacterium;s__Carnobacterium maltaromaticum	GCF_000744945.1	Illumina Novaseq S4	79	95.63	7.19	3.39852	0.062383	34.41	43019
UW_MP_SPHING1_1		JAKVLC000000000	UW_MP_USB	UFMP-fed upflow sludge blanket bioreactor (Walters et al., 2022)	d__Bacteria;p__Proteobacteria;c__Alphaproteobacteria;o__Sphingomonadales;f__Sphingomonadaceae;g__Sphingobium;s__	N/A	Illumina Novaseq S4	48	98.11	0.78	2.80835	0.078943	63.26	58507
UW_Xyl_COR6		JAJGAE000000000	UW_Xyl	Xylose-rich synthetic cellulosic medium fed bioreactors (Scarborough et al., 2022b)	d__Bacteria;p__Actinobacteriota;c__Coriobacteriia;o__Coriobacteriales;f__Eggerthellaceae;g__RUG013;s__	GCF_001486445.1	Illumina Novaseq S4	133	93.03	2.49	1.87515	0.019826	64.97	14098
UW_MP_ACID4_1		JAKVKY000000000	UW_MP_USB	UFMP-fed upflow sludge blanket bioreactor (Walters et al., 2022)	d__Bacteria;p__Firmicutes_C;c__Negativicutes;o__Acidaminococcales;f__Acidaminococcaceae;g__;s__	N/A	Illumina Novaseq S4	58	79.92	1.2	1.72068	0.038348	51.94	29666
UW_MP_OSCL2_1		JALCRQ000000000	UW_MP_CSTR	Reactor described in this paper and previously (Walters et al., 2022)	d__Bacteria;p__Firmicutes_A;c__Clostridia;o__Oscillospirales;f__Oscillospiraceae;g__Oscillibacter;s__	N/A	Illumina NovaSeq S4	63	93.74	3.02	1.79601	0.029278	61.65	28508
UW_DM_ACUT1_1		JALCRG000000000	UW_DM	Dairy manure hydrolysate fed bioreactor (Ingle et al., 2022)	d__Bacteria;p__Firmicutes_A;c__Clostridia;o__Oscillospirales;f__Acutalibacteraceae;g__UBA4871;s__UBA4871 sp902809935	GCF_902809935.1	Illumina Novaseq S4	6	97.85	0.34	2.3015	0.429045	42.76	383583
UW_DM_BACIL1_1		JALCLG000000000	UW_DM - Inoculant	Dairy manure hydrolysate fed bioreactor (Ingle et al., 2022)	d__Bacteria;p__Firmicutes;c__Bacilli;o__RFN20;f__CAG-288;g__UBA7642;s__	N/A	PacBio Sequel II	1	96.63	0	2.07982	2.07982	49.99	2079823
UW_MP_BACIL4_1		JALCDB000000000	UW_MP_USB	UFMP-fed upflow sludge blanket bioreactor (Walters et al., 2022)	d__Bacteria;p__Firmicutes;c__Bacilli;o__RFN20;f__CAG-826;g__UBA4951;s__	N/A	Illumina Novaseq S4	15	85.39	0.05	1.59136	0.237851	52.35	106090
UW_MP_OSCL1_1		JALCRR000000000	UW_MP_CSTR	Reactor described in this paper and previously (Walters et al., 2022)	d__Bacteria;p__Firmicutes_A;c__Clostridia;o__Oscillospirales;f__Oscillospiraceae;g__Oscillibacter;s__	N/A	Illumina NovaSeq S4	69	96.98	1.34	2.25273	0.042828	55.4	32648
UW_MP_BACTE4_1		JALCMP000000000	UW_MP_CSTR	Reactor described in this paper and previously (Walters et al., 2022)	d__Bacteria;p__Bacteroidota;c__Bacteroidia;o__Bacteroidales;f__UBA932;g__UBA1232;s__	N/A	Illumina Novaseq S4	56	95	0.95	2.36734	0.063665	41.79	42274
UW_TS_ACET5_1		JALCGI000000000	UW_TS	Starch-ethanol thin stillage fed bioreactor (Fortney et al., 2022)	d__Bacteria;p__Proteobacteria;c__Alphaproteobacteria;o__Acetobacterales;f__Acetobacteraceae;g__Acetobacter;s__Acetobacter peroxydans	GCF_006539345.1	Illumina NovaSeq S4	29	100	0	2.55868	0.117286	60.72	88230
UW_MP_BIF10_1		JALCLO000000000	UW_MP_USB	UFMP-fed upflow sludge blanket bioreactor (Walters et al., 2022)	d__Bacteria;p__Actinobacteriota;c__Actinomycetia;o__Actinomycetales;f__Bifidobacteriaceae;g__Bifidobacterium;s__Bifidobacterium crudilactis	GCF_000738005.1	PacBio Sequel II	1	92.41	1.21	2.06242	2.06242	57.67	2062421
UW_DM_LAC2_1		JALCPY000000000	UW_DM	Dairy manure hydrolysate fed bioreactor (Ingle et al., 2022)	d__Bacteria;p__Firmicutes;c__Bacilli;o__Lactobacillales;f__Lactobacillaceae;g__Lactobacillus;s__Lactobacillus delbrueckii	GCF_001433875.1	Illumina Novaseq S4	53	86.47	0	1.50923	0.035941	50.72	28475
UW_DM_CLOS2_1		JALCPJ000000000	UW_DM	Dairy manure hydrolysate fed bioreactor (Ingle et al., 2022)	d__Bacteria;p__Firmicutes_A;c__Clostridia;o__Clostridiales;f__Clostridiaceae;g__Clostridium_B;s__Clostridium_B luticellarii	GCF_002995845.1	Illumina Novaseq S4	75	99.14	0	3.12629	0.062443	35.3	41683
UW_MP_LAC1_1		JAKVJT000000000	UW_MP_USB	UFMP-fed upflow sludge blanket bioreactor (Walters et al., 2022)	d__Bacteria;p__Firmicutes;c__Bacilli;o__Lactobacillales;f__Lactobacillaceae;g__Lactobacillus;s__Lactobacillus delbrueckii	GCF_001433875.1	Illumina NovaSeq S4	62	96.43	0	1.79991	0.036981	50.17	29030
UW_TS_EUB1_1		JAKVNN000000000	UW_TS	Starch-ethanol thin stillage fed bioreactor (Fortney et al., 2022)	d__Bacteria;p__Firmicutes_A;c__Clostridia;o__Peptostreptococcales;f__Anaerovoracaceae;g__Eubacterium_T;s__	GCF_900766045.1	PacBio Sequel II	1	99.29	0.71	2.7501	2.7501	49.29	2750104
UW_TS_EGG1_1		JALCHN000000000	UW_TS	Starch-ethanol thin stillage fed bioreactor (Fortney et al., 2022)	d__Bacteria;p__Actinobacteriota;c__Coriobacteriia;o__Coriobacteriales;f__Eggerthellaceae;g__RUG013;s__	N/A	Illumina Novaseq S4	56	99.19	1.49	1.95945	0.044707	64.75	34990
UW_MP_BIF15_1		JALCLN000000000	UW_MP_USB	UFMP-fed upflow sludge blanket bioreactor (Walters et al., 2022)	d__Bacteria;p__Actinobacteriota;c__Actinomycetia;o__Actinomycetales;f__Bifidobacteriaceae;g__Bifidobacterium;s__Bifidobacterium crudilactis	GCF_000738005.1	PacBio Sequel II	5	84.03	0.98	1.75139	0.479481	57.64	350278
UW_MP_SCHLAC2_1		JALCTX000000000	UW_MP_CSTR	Reactor described in this paper and previously (Walters et al., 2022)	d__Bacteria;p__Firmicutes;c__Bacilli;o__Lactobacillales;f__Lactobacillaceae;g__Schleiferilactobacillus;s__Schleiferilactobacillus perolens	GCF_001435585.1	Illumina NovaSeq S4	42	95.29	0.79	2.83681	0.107959	49.39	67542
UW_Xyl_COR5		JAJGAD000000000	UW_Xyl	Xylose-rich synthetic cellulosic medium fed bioreactors (Scarborough et al., 2022b)	d__Bacteria;p__Actinobacteriota;c__Coriobacteriia;o__Coriobacteriales;f__Atopobiaceae;g__Olsenella;s__	GCF_009695875.1	Illumina Novaseq S4	46	100	6.45	2.74486	0.106098	65.78	59670
UW_DM_LCO1_1		JALCKY000000000	UW_DM - Inoculant	Dairy manure hydrolysate fed bioreactor - inoculant (Ingle et al., 2022)	d__Bacteria;p__Firmicutes_A;c__Clostridia;o__Lachnospirales;f__Lachnospiraceae;g__;s__	N/A	PacBio Sequel II	11	91.14	1.64	3.02661	0.375901	51.98	275146
UW_MP_ACUT3_1		JALCSH000000000	UW_MP_CSTR	Reactor described in this paper and previously (Walters et al., 2022)	d__Bacteria;p__Firmicutes_A;c__Clostridia;o__Oscillospirales;f__Acutalibacteraceae;g__Ruminococcus_E;s__Ruminococcus_E sp902766885	GCA_902766885.1	Illumina Novaseq S4	78	90.16	0.67	1.96191	0.029939	41.58	25152
UW_Xyl_COR4		JAJGAC000000000	UW_Xyl	Xylose-rich synthetic cellulosic medium fed bioreactors (Scarborough et al., 2022b)	d__Bacteria;p__Actinobacteriota;c__Coriobacteriia;o__Coriobacteriales;f__Atopobiaceae;g__Olegusella;s__Olegusella sp002407925	GCA_002407925.1	Illumina Novaseq S4	165	78.65	2.82	1.36553	0.011723	53.2	8275
UW_MP_MEG3_1		JALCDF000000000	UW_MP_USB	UFMP-fed upflow sludge blanket bioreactor (Walters et al., 2022)	d__Bacteria;p__Firmicutes_C;c__Negativicutes;o__Veillonellales;f__Megasphaeraceae;g__Megasphaera;s__	N/A	Illumina NovaSeq S4	73	84.28	0.6	1.68717	0.031132	46.87	23111
UW_MP_LAC3_1		JALCCW000000000	UW_MP_USB	UFMP-fed upflow sludge blanket bioreactor (Walters et al., 2022)	d__Bacteria;p__Firmicutes;c__Bacilli;o__Lactobacillales;f__Lactobacillaceae;g__Lactobacillus;s__Lactobacillus delbrueckii	GCF_001433875.1	Illumina Novaseq S4	41	83.77	0.09	1.33761	0.04725	50.7	32624
UW_DM_PREV1_1		JALCLC000000000	UW_DM - Inoculant	Dairy manure hydrolysate fed bioreactor - inoculant (Ingle et al., 2022)	d__Bacteria;p__Bacteroidota;c__Bacteroidia;o__Bacteroidales;f__Bacteroidaceae;g__Prevotella;s__	N/A	PacBio Sequel II	18	89.16	0	2.4648	0.166331	37.89	136933
UW_DM_PSEUD1_1		JALCKX000000000	UW_DM - Inoculant	Dairy manure hydrolysate fed bioreactor - inoculant (Ingle et al., 2022)	d__Bacteria;p__Proteobacteria;c__Gammaproteobacteria;o__Pseudomonadales;f__Pseudomonadaceae;g__Pseudomonas_E;s__Pseudomonas_E veronii	GCF_001439695.1	PacBio Sequel II	21	92.27	2.49	6.3217	0.422793	61.35	301033
UW_DM_ATO1_1		JALCQQ000000000	UW_DM	Dairy manure hydrolysate fed bioreactor (Ingle et al., 2022)	d__Bacteria;p__Actinobacteriota;c__Coriobacteriia;o__Coriobacteriales;f__Atopobiaceae;g__Olsenella;s__Olsenella sp900555995	GCF_009695875.1	Illumina Novaseq S4	19	99.8	0.08	2.18215	0.254458	65	114850
UW_MP_STREP4_1		JAKVKT000000000	UW_MP_USB	UFMP-fed upflow sludge blanket bioreactor (Walters et al., 2022)	d__Bacteria;p__Firmicutes;c__Bacilli;o__Lactobacillales;f__Streptococcaceae;g__Lactococcus_A;s__Lactococcus_A raffinolactis	GCF_001591765.1	Illumina Novaseq S4	37	90.57	0.5	1.91142	0.082688	40.38	51660
UW_TS_NIT1_1		JALCDO000000000	UW_TS	Starch-ethanol thin stillage fed bioreactor (Fortney et al., 2022)	d__Bacteria;p__Nitrospirota;c__Nitrospiria;o__Nitrospirales;f__Nitrospiraceae;g__Nitrospira_A;s__	N/A	Illumina Novaseq S4	32	94.49	0.91	3.9601	0.268274	58.26	123753
UW_TS_RUM1_1		JALCDN000000000	UW_TS	Starch-ethanol thin stillage fed bioreactor (Fortney et al., 2022)	d__Bacteria;p__Firmicutes_A;c__Clostridia;o__Oscillospirales;f__Ruminococcaceae;g__Ruminococcus;s__	N/A	Illumina Novaseq S4	82	89.6	0.12	1.96977	0.027421	39.24	24021
UW_MP_CLOS2_1		JALCLL000000000	UW_MP_USB	UFMP-fed upflow sludge blanket bioreactor (Walters et al., 2022)	d__Bacteria;p__Firmicutes_A;c__Clostridia;o__Clostridiales;f__Clostridiaceae;g__Clostridium_B;s__Clostridium_B tyrobutyricum	GCF_000359585.1	PacBio Sequel II	1	99.49	0.23	3.06237	3.06237	30.99	3062375
UW_SG_COR3		QOUN00000000	UW_SG	Cellulosic ethanol thin stillage fed bioreactor (Scarborough et al., 2018a)	d__Bacteria; p__Actinobacteriota; c__Coriobacteriia; o__Coriobacteriales; f__Atopobiaceae; g__UBA7748; s__UBA7748 sp003862175	GCA_018128285.1	Illumina Novaseq S4	558	98.39	7.41	3.64741	0.013371	55.46	6533
UW_TS_ACET4_1		JAKVMF000000000	UW_TS	Starch-ethanol thin stillage fed bioreactor (Fortney et al., 2022)	d__Bacteria;p__Proteobacteria;c__Alphaproteobacteria;o__Acetobacterales;f__Acetobacteraceae;g__Acetobacter;s__Acetobacter peroxydans	GCF_006539345.1	PacBio Sequel II	2	99.5	0.5	2.64155	2.16198	60.33	1320774
UW_DM_ACET2_1		JALCRI000000000	UW_DM	Dairy manure hydrolysate fed bioreactor (Ingle et al., 2022)	d__Bacteria;p__Proteobacteria;c__Alphaproteobacteria;o__Acetobacterales;f__Acetobacteraceae;g__Acetobacter;s__Acetobacter peroxydans	GCF_006539345.1	Illumina Novaseq S4	43	97.01	0.03	2.42175	0.072249	60.81	56319
UW_TS_ACET1_1		JAKVNI000000000	UW_TS	Starch-ethanol thin stillage fed bioreactor (Fortney et al., 2022)	d__Bacteria;p__Proteobacteria;c__Alphaproteobacteria;o__Acetobacterales;f__Acetobacteraceae;g__Acetobacter;s__Acetobacter fabarum	GCF_011516925.1	PacBio Sequel II	1	100	0.25	2.8958	2.8958	58.31	2895799
UW_DM_XAN1_1		JALCLA000000000	UW_DM - Inoculant	Dairy manure hydrolysate fed bioreactor - inoculant (Ingle et al., 2022)	d__Bacteria;p__Proteobacteria;c__Gammaproteobacteria;o__Xanthomonadales;f__Xanthomonadaceae;g__Chiayiivirga;s__	N/A	PacBio Sequel II	9	95.09	2.78	3.67803	0.761804	66.87	408670
UW_TS_TETRA1_1		JALCDJ000000000	UW_TS	Starch-ethanol thin stillage fed bioreactor (Fortney et al., 2022)	d__Bacteria;p__Actinobacteriota;c__Actinomycetia;o__Actinomycetales;f__Dermatophilaceae;g__Tetrasphaera_A;s__Tetrasphaera_A jenkinsii	GCF_001046875.1	Illumina Novaseq S4	83	78.29	0.45	2.84775	0.051019	68.5	34310
UW_TS_LACCAS1_1		JAKVNB000000000	UW_TS	Starch-ethanol thin stillage fed bioreactor (Fortney et al., 2022)	d__Bacteria;p__Firmicutes;c__Bacilli;o__Lactobacillales;f__Lactobacillaceae;g__Lacticaseibacillus;s__Lacticaseibacillus paracasei	GCF_000829035.1	PacBio Sequel II	1	99.46	0	3.02579	3.02579	46.55	3025788
UW_DM_XAN2_1		JALCKV000000000	UW_DM - Inoculant	Dairy manure hydrolysate fed bioreactor - inoculant (Ingle et al., 2022)	d__Bacteria;p__Proteobacteria;c__Gammaproteobacteria;o__Xanthomonadales;f__Xanthomonadaceae;g__Chiayiivirga;s__	N/A	PacBio Sequel II	2	83.59	0.86	3.74698	1.89073	66.94	1873489
UW_DM_ANA1_1		JALCQR000000000	UW_DM	Dairy manure hydrolysate fed bioreactor (Ingle et al., 2022)	d__Bacteria;p__Firmicutes_A;c__Clostridia;o__Lachnospirales;f__Anaerotignaceae;g__HGM11808;s__	N/A	Illumina Novaseq S4	19	97.99	0.89	2.60956	0.187209	36.68	137345
UW_DM_LACCAS2_1		JALCOI000000000	UW_DM	Dairy manure hydrolysate fed bioreactor (Ingle et al., 2022)	d__Bacteria;p__Firmicutes;c__Bacilli;o__Lactobacillales;f__Lactobacillaceae;g__Lacticaseibacillus;s__Lacticaseibacillus rhamnosus	GCA_000615245.1	Illumina Novaseq S4	74	95.13	1.63	2.83076	0.070721	46.56	38253
UW_DM_DIAL1_1		JAKVPC000000000	UW_DM	Dairy manure hydrolysate fed bioreactor (Ingle et al., 2022)	d__Bacteria;p__Firmicutes_C;c__Negativicutes;o__Veillonellales;f__Dialisteraceae;g__Dialister;s__Dialister hominis	GCF_007164725.1	PacBio Sequel II	2	94.3	0.02	1.86673	1.38223	47.9	933363
UW_TS_SAP1_1		JALCDL000000000	UW_TS	Starch-ethanol thin stillage fed bioreactor (Fortney et al., 2022)	d__Bacteria;p__Bacteroidota;c__Bacteroidia;o__Chitinophagales;f__Saprospiraceae;g__UBA3362;s__	N/A	Illumina Novaseq S4	116	96.78	0.14	4.30922	0.050077	33.34	37148
UW_DM_FLAV1_1		JALCLE000000000	UW_DM - Inoculant	Dairy manure hydrolysate fed bioreactor - inoculant (Ingle et al., 2022)	d__Bacteria;p__Bacteroidota;c__Bacteroidia;o__Flavobacteriales;f__PHOS-HE28;g__PHOS-HE28;s__	N/A	PacBio Sequel II	9	96.46	0.18	3.66992	0.595105	56.92	407768
UW_SG_LAC2		QOUR00000000	UW_SG	Cellulosic ethanol thin stillage fed bioreactor (Scarborough et al., 2018a)	d__Bacteria; p__Firmicutes; c__Bacilli; o__Lactobacillales; f__Lactobacillaceae; g__Lentilactobacillus; s__Lentilactobacillus hilgardii	GCA_000159315.1	Illumina Novaseq S4	80	99.38	1.56	3.17917	0.122889	40.47	39739
UW_MP_PREV7_1		JALCLI000000000	UW_MP_USB	UFMP-fed upflow sludge blanket bioreactor (Walters et al., 2022)	d__Bacteria;p__Bacteroidota;c__Bacteroidia;o__Bacteroidales;f__Bacteroidaceae;g__Prevotella;s__	N/A	PacBio Sequel II	15	77.7	4.48	2.52373	0.319951	40.52	168248
UW_DM_ACET1_1		JALCOP000000000	UW_DM	Dairy manure hydrolysate fed bioreactor (Ingle et al., 2022)	d__Bacteria;p__Proteobacteria;c__Alphaproteobacteria;o__Acetobacterales;f__Acetobacteraceae;g__Acetobacter;s__Acetobacter fabarum	GCF_011516925.1	Illumina Novaseq S4	10	96.02	0.25	2.32389	0.593251	58.95	232388
UW_TS_LCO3_1		JAKVNU000000000	UW_TS	Starch-ethanol thin stillage fed bioreactor (Fortney et al., 2022)	d__Bacteria;p__Firmicutes_A;c__Clostridia;o__Lachnospirales;f__Lachnospiraceae;g__CAG-791;s__CAG-791 sp900317475	GCA_900317475.1	PacBio Sequel II	1	96.15	0.69	3.33192	3.33192	51.78	3331916
UW_MP_TREP1_1		JALCCK000000000	UW_MP_USB	UFMP-fed upflow sludge blanket bioreactor (Walters et al., 2022)	d__Bacteria;p__Spirochaetota;c__Spirochaetia;o__Treponematales;f__Treponemataceae;g__Treponema_D;s__	N/A	Illumina Novaseq S4	95	84.62	0.35	2.69176	0.036147	44.8	28334
UW_DM_SCHLAC1_1		JALCOF000000000	UW_DM	Dairy manure hydrolysate fed bioreactor (Ingle et al., 2022)	d__Bacteria;p__Firmicutes;c__Bacilli;o__Lactobacillales;f__Lactobacillaceae;g__Schleiferilactobacillus;s__Schleiferilactobacillus perolens	GCF_001435585.1	Illumina Novaseq S4	76	98.3	1.05	2.82039	0.056988	49.2	37110
UW_MP_MEG1_1		JAKVKI000000000	UW_MP_USB	UFMP-fed upflow sludge blanket bioreactor (Walters et al., 2022)	d__Bacteria;p__Firmicutes_C;c__Negativicutes;o__Veillonellales;f__Megasphaeraceae;g__Megasphaera;s__	N/A	Illumina NovaSeq S4	47	92.22	0.6	1.90344	0.057356	45.65	40498
UW_MP_MYC1_1		JALCDE000000000	UW_MP_USB	UFMP-fed upflow sludge blanket bioreactor (Walters et al., 2022)	d__Bacteria;p__Actinobacteriota;c__Actinomycetia;o__Mycobacteriales;f__Mycobacteriaceae;g__Corynebacterium;s__Corynebacterium provencense	GCF_900049755.1	Illumina Novaseq S4	29	96.62	1.91	2.99551	0.201682	67.14	103293
UW_TS_GAST1_1		JALCDS000000000	UW_TS	Starch-ethanol thin stillage fed bioreactor (Fortney et al., 2022)	d__Bacteria;p__Cyanobacteria;c__Vampirovibrionia;o__Gastranaerophilales;f__Gastranaerophilaceae;g__;s__	N/A	Illumina Novaseq S4	41	84.62	0.85	1.71421	0.075093	32.48	41810
UW_SG_EUB1		VOGB00000000	UW_SG+	Cellulosic ethanol thin stillage fed bioreactor (Scarborough et al., 2018a), MAG updated with additional sequencing (Scarborough et al., 2020)	d__Bacteria;p__Firmicutes_A;c__Clostridia;o__Eubacteriales;f__Eubacteriaceae;g__Pseudoramibacter;s__Pseudoramibacterfermentans	GCA_002396065.1	PacBio Sequel II	35	97.77	0.23	2.00261	0.142846	51.21	57217
UW_TS_ACID1_1		JAKVMG000000000	UW_TS	Starch-ethanol thin stillage fed bioreactor (Fortney et al., 2022)	d__Bacteria;p__Firmicutes_C;c__Negativicutes;o__Acidaminococcales;f__Acidaminococcaceae;g__Acidaminococcus;s__Acidaminococcus provencensis	GCF_900291475.1	PacBio Sequel II	1	99.38	1.2	2.91486	2.91486	52.84	2914862
UW_TS_ACET2_1		JAKVNJ000000000	UW_TS	Starch-ethanol thin stillage fed bioreactor (Fortney et al., 2022)	d__Bacteria;p__Proteobacteria;c__Alphaproteobacteria;o__Acetobacterales;f__Acetobacteraceae;g__Acetobacter;s__	GCA_012517935.1	PacBio Sequel II	1	100	1.24	3.36684	3.36684	54.36	3366842
UW_MP_MEG5_1		JALCLJ000000000	UW_MP_USB	UFMP-fed upflow sludge blanket bioreactor (Walters et al., 2022)	d__Bacteria;p__Firmicutes_C;c__Negativicutes;o__Veillonellales;f__Megasphaeraceae;g__Megasphaera;s__Megasphaera cerevisiae	GCF_001045675.1	PacBio Sequel II	7	76.05	1.87	1.70459	0.339652	44.48	243513
UW_MP_PREV4_1		JAKVJW000000000	UW_MP_USB	UFMP-fed upflow sludge blanket bioreactor (Walters et al., 2022)	d__Bacteria;p__Bacteroidota;c__Bacteroidia;o__Bacteroidales;f__Bacteroidaceae;g__Prevotella;s__	N/A	Illumina NovaSeq S4	73	89.67	1.01	2.93331	0.068436	40.2	40182
UW_MP_SELEN1_1		JAKVOG000000000	UW_MP_USB	UFMP-fed upflow sludge blanket bioreactor (Walters et al., 2022)	d__Bacteria;p__Firmicutes_C;c__Negativicutes;o__Selenomonadales;f__Selenomonadaceae;g__Selenomonas_A;s__	N/A	PacBio Sequel II	22	90.69	1.87	2.94106	0.232634	51.65	133684
UW_MP_CAUL1_1		JAKVIZ000000000	UW_MP_USB	UFMP-fed upflow sludge blanket bioreactor (Walters et al., 2022)	d__Bacteria;p__Proteobacteria;c__Alphaproteobacteria;o__Caulobacterales;f__Caulobacteraceae;g__Brevundimonas;s__Brevundimonas sp002386585	GCA_002386585.1	Illumina NovaSeq S4	15	100	0.39	3.59816	0.487738	67.44	239877
UW_TS_BUL2_1		JAKVNL000000000	UW_TS	Starch-ethanol thin stillage fed bioreactor (Fortney et al., 2022)	d__Bacteria;p__Firmicutes;c__Bacilli;o__Erysipelotrichales;f__Erysipelotrichaceae;g__Bulleidia;s__Bulleidia sp900319505	GCA_900319505.1	Illumina Novaseq S4	2	100	1.27	2.72072	2.2659	46.82	1360358
UW_MP_LCO3_1		JAKVKH000000000	UW_MP_USB	UFMP-fed upflow sludge blanket bioreactor (Walters et al., 2022)	d__Bacteria;p__Firmicutes_A;c__Clostridia;o__Lachnospirales;f__Lachnospiraceae;g__Butyrivibrio;s__	N/A	Illumina NovaSeq S4	60	94.33	3.01	3.57435	0.073154	45.11	59572
UW_DM_ANA2_1		JALCPN000000000	UW_DM	Dairy manure hydrolysate fed bioreactor (Ingle et al., 2022)	d__Bacteria;p__Firmicutes_A;c__Clostridia;o__Lachnospirales;f__Anaerotignaceae;g__HGM11808;s__	N/A	Illumina Novaseq S4	94	77.08	0.56	2.33162	0.029649	36.21	24804
UW_TS_EUB2_1		JAKVMM000000000	UW_TS	Starch-ethanol thin stillage fed bioreactor (Fortney et al., 2022)	d__Bacteria;p__Firmicutes_A;c__Clostridia;o__Eubacteriales;f__Eubacteriaceae;g__Pseudoramibacter;s__	N/A	PacBio Sequel II	1	97.89	0.94	1.96555	1.96555	50.02	1965554
UW_DM_LENLAC1_1		JALCQL000000000	UW_DM	Dairy manure hydrolysate fed bioreactor (Ingle et al., 2022)	d__Bacteria;p__Firmicutes;c__Bacilli;o__Lactobacillales;f__Lactobacillaceae;g__Lentilactobacillus;s__Lentilactobacillus hilgardii	GCF_000159315.1	Illumina Novaseq S4	54	96.75	0.31	2.94279	0.082345	39.99	54496
UW_TS_LIMLAC1_1		JALCHW000000000	UW_TS	Starch-ethanol thin stillage fed bioreactor (Fortney et al., 2022)	d__Bacteria;p__Firmicutes;c__Bacilli;o__Lactobacillales;f__Lactobacillaceae;g__Limosilactobacillus;s__Limosilactobacillus mucosae	GCF_001436025.1	Illumina NovaSeq S4	60	91.47	0.82	1.84667	0.040201	47.12	30777
UW_Xyl_LAC5_1		JAJGAF000000000	UW_Xyl	Xylose-rich synthetic cellulosic medium fed bioreactors (Scarborough et al., 2022b)	d__Bacteria;p__Firmicutes;c__Bacilli;o__Lactobacillales;f__Lactobacillaceae;g__Limosilactobacillus;s__Limosilactobacillus mucosae	GCF_001436025.1	Illumina Novaseq S4	17	99.18	0	1.99285	0.211056	46.74	117226
UW_DM_LIGLAC1_1		JALCPD000000000	UW_DM	Dairy manure hydrolysate fed bioreactor (Ingle et al., 2022)	d__Bacteria;p__Firmicutes;c__Bacilli;o__Lactobacillales;f__Lactobacillaceae;g__Ligilactobacillus;s__Ligilactobacillus acidipiscis	GCF_001435755.1	Illumina Novaseq S4	66	89.01	1.83	1.56289	0.031071	39.32	23680
UW_Xyl_ACET1		JAJGAA000000000	UW_Xyl	Xylose-rich synthetic cellulosic medium fed bioreactors (Scarborough et al., 2022b)	d__Bacteria;p__Proteobacteria;c__Alphaproteobacteria;o__Acetobacterales;f__Acetobacteraceae;g__Acetobacter;s__Acetobacter senegalensis	GCF_001580995.1	Illumina Novaseq S4	36	99.5	0	3.08708	0.164642	56.28	85752
UW_SG_LAC1		QOUU00000000	UW_SG	Cellulosic ethanol thin stillage fed bioreactor (Scarborough et al., 2018a)	d__Bacteria; p__Firmicutes; c__Bacilli; o__Lactobacillales; f__Lactobacillaceae; g__Paucilactobacillus; s__Paucilactobacillus vaccinostercus	GCA_001436295.1	Illumina Novaseq S4	18	99.46	1.09	2.63389	0.640122	43.6	146327
UW_SG_LAC3		QOUQ00000000	UW_SG	Cellulosic ethanol thin stillage fed bioreactor (Scarborough et al., 2018a)	d__Bacteria; p__Firmicutes; c__Bacilli; o__Lactobacillales; f__Lactobacillaceae; g__Loigolactobacillus; s__Loigolactobacillus coryniformis	GCA_002706425.1	Illumina Novaseq S4	175	99.18	1.36	2.70406	0.029509	43.01	15449
UW_SG_LAC4		QOUP00000000	UW_SG	Cellulosic ethanol thin stillage fed bioreactor (Scarborough et al., 2018a)	d__Bacteria; p__Firmicutes; c__Bacilli; o__Lactobacillales; f__Lactobacillaceae; g__Lentilactobacillus; s__Lentilactobacillus diolivorans	GCA_001434255.1	Illumina Novaseq S4	95	98.94	1.25	3.33523	0.086779	40.21	35107
UW_Xyl_LAC6		JAJGAG000000000	UW_Xyl	Xylose-rich synthetic cellulosic medium fed bioreactors (Scarborough et al., 2022b)	d__Bacteria;p__Firmicutes;c__Bacilli;o__Lactobacillales;f__Lactobacillaceae;g__Lentilactobacillus;s__Lentilactobacillus buchneri	GCF_001434735.1	Illumina Novaseq S4	22	99.06	0	2.47474	0.236046	44.33	112488
UW_SG_LCO1		VOGC00000000	UW_SG+	Cellulosic ethanol thin stillage fed bioreactor (Scarborough et al., 2018a), MAG updated with additional sequencing (Scarborough et al., 2020)	d__Bacteria;p__Firmicutes_A;c__Clostridia;o__Lachnospirales;f__Lachnospiraceae;g__Weimeria;s__Weimeriabifida	GCA_003862155.1	PacBio Sequel II	44	95.42	0	2.10691	0.103964	45.72	47884
UW_Xyl_LCO2		JAJGAH000000000	UW_Xyl	Xylose-rich synthetic cellulosic medium fed bioreactors (Scarborough et al., 2022b)	d__Bacteria;p__Firmicutes_A;c__Clostridia;o__Lachnospirales;f__Lachnospiraceae;g__Eubacterium_H;s__	N/A	Illumina Novaseq S4	384	77.14	2.12	2.53011	0.007313	48.22	6588
UW_DM_ACUT2_1		JALCPP000000000	UW_DM	Dairy manure hydrolysate fed bioreactor (Ingle et al., 2022)	d__Bacteria;p__Firmicutes_A;c__Clostridia;o__Oscillospirales;f__Acutalibacteraceae;g__Caprobacter;s__	N/A	Illumina Novaseq S4	18	97.99	0.02	2.55051	0.249649	48.65	141695
UW_DM_ACUT4_1		JALCQE000000000	UW_DM	Dairy manure hydrolysate fed bioreactor (Ingle et al., 2022)	d__Bacteria;p__Firmicutes_A;c__Clostridia;o__Oscillospirales;f__Acutalibacteraceae;g__Caprobacter;s__	GCA_002407675.1	Illumina Novaseq S4	52	80.54	0.67	1.72743	0.038926	52.04	33219
UW_DM_BIF1_1		JALCQD000000000	UW_DM	Dairy manure hydrolysate fed bioreactor (Ingle et al., 2022)	d__Bacteria;p__Actinobacteriota;c__Actinomycetia;o__Actinomycetales;f__Bifidobacteriaceae;g__;s__	N/A	Illumina Novaseq S4	6	100	0	2.1621	0.65855	57.32	360349
UW_DM_BIF2_1		JALCQC000000000	UW_DM	Dairy manure hydrolysate fed bioreactor (Ingle et al., 2022)	d__Bacteria;p__Actinobacteriota;c__Actinomycetia;o__Actinomycetales;f__Bifidobacteriaceae;g__;s__	N/A	Illumina Novaseq S4	32	95.69	0	2.05868	0.106512	57.09	64333
UW_DM_BIF4_1		JALCOX000000000	UW_DM	Dairy manure hydrolysate fed bioreactor (Ingle et al., 2022)	d__Bacteria;p__Actinobacteriota;c__Actinomycetia;o__Actinomycetales;f__Bifidobacteriaceae;g__;s__	N/A	Illumina Novaseq S4	71	89.58	0	1.70321	0.028493	58.33	23988
UW_DM_ENTER1_1		JALCOL000000000	UW_DM	Dairy manure hydrolysate fed bioreactor (Ingle et al., 2022)	d__Bacteria;p__Firmicutes;c__Bacilli;o__Lactobacillales;f__Enterococcaceae;g__;s__	N/A	Illumina Novaseq S4	26	96.69	1.66	2.37132	0.168079	47.22	91204
UW_DM_LAC3_1		JALCOU000000000	UW_DM	Dairy manure hydrolysate fed bioreactor (Ingle et al., 2022)	d__Bacteria;p__Firmicutes;c__Bacilli;o__Lactobacillales;f__Lactobacillaceae;g__Lactobacillus;s__Lactobacillus amylovorus	GCF_002706375.1	Illumina Novaseq S4	53	77.52	0.08	1.24716	0.027935	38.13	23531
UW_DM_LACCAS1_1		JALCPX000000000	UW_DM	Dairy manure hydrolysate fed bioreactor (Ingle et al., 2022)	d__Bacteria;p__Firmicutes;c__Bacilli;o__Lactobacillales;f__Lactobacillaceae;g__Lacticaseibacillus;s__Lacticaseibacillus sp900540605	GCA_900540605.1	Illumina Novaseq S4	32	97.08	0.52	2.32568	0.097253	53.4	72677
UW_DM_LACCAS3_1		JALCQM000000000	UW_DM	Dairy manure hydrolysate fed bioreactor (Ingle et al., 2022)	d__Bacteria;p__Firmicutes;c__Bacilli;o__Lactobacillales;f__Lactobacillaceae;g__Lacticaseibacillus;s__	N/A	Illumina Novaseq S4	73	91.97	1.31	2.77148	0.054188	52.71	37965
UW_DM_LIMLAC1_1		JAKVPL000000000	UW_DM	Dairy manure hydrolysate fed bioreactor (Ingle et al., 2022)	d__Bacteria;p__Firmicutes;c__Bacilli;o__Lactobacillales;f__Lactobacillaceae;g__Limosilactobacillus;s__	N/A	PacBio Sequel II	1	99.46	1.09	2.33532	2.33532	52.19	2335323
UW_DM_LIMLAC2_1		JAKVPM000000000	UW_DM	Dairy manure hydrolysate fed bioreactor (Ingle et al., 2022)	d__Bacteria;p__Firmicutes;c__Bacilli;o__Lactobacillales;f__Lactobacillaceae;g__Limosilactobacillus;s__Limosilactobacillus oris	GCF_001434465.1	PacBio Sequel II	1	99.45	0	2.0442	2.0442	49.58	2044198
UW_DM_LIMLAC3_1		JALCQJ000000000	UW_DM	Dairy manure hydrolysate fed bioreactor (Ingle et al., 2022)	d__Bacteria;p__Firmicutes;c__Bacilli;o__Lactobacillales;f__Lactobacillaceae;g__Limosilactobacillus;s__Limosilactobacillus timonensis	GCF_900240275.1	Illumina Novaseq S4	32	95.11	0	1.28562	0.053832	47.82	40175
UW_DM_LIMLAC4_1		JALCQI000000000	UW_DM	Dairy manure hydrolysate fed bioreactor (Ingle et al., 2022)	d__Bacteria;p__Firmicutes;c__Bacilli;o__Lactobacillales;f__Lactobacillaceae;g__Limosilactobacillus;s__	N/A	Illumina Novaseq S4	42	91.29	0	1.53119	0.043528	41.25	36456
UW_MP_ACUT4_1		JAKVJJ000000000	UW_MP_USB	UFMP-fed upflow sludge blanket bioreactor (Walters et al., 2022)	d__Bacteria;p__Firmicutes_A;c__Clostridia;o__Oscillospirales;f__Acutalibacteraceae;g__UBA4871;s__	N/A	Illumina Novaseq S4	48	82.21	0	1.73985	0.054604	48.88	36246
UW_MP_AGRLAC1_1		JAKVKU000000000	UW_MP_USB	UFMP-fed upflow sludge blanket bioreactor (Walters et al., 2022)	d__Bacteria;p__Firmicutes;c__Bacilli;o__Lactobacillales;f__Lactobacillaceae;g__Agrilactobacillus;s__	GCF_001436375.1	Illumina Novaseq S4	25	99.48	1.05	3.34397	0.209297	45.01	133758
UW_MP_ATO2_1		JAKVOB000000000	UW_MP_USB	UFMP-fed upflow sludge blanket bioreactor (Walters et al., 2022)	d__Bacteria;p__Actinobacteriota;c__Coriobacteriia;o__Coriobacteriales;f__Atopobiaceae;g__;s__	N/A	PacBio Sequel II	1	97.58	0	2.276	2.276	65.2	2276002
UW_MP_BACIL7_1		JAKVOC000000000	UW_MP_USB	UFMP-fed upflow sludge blanket bioreactor (Walters et al., 2022)	d__Bacteria;p__Firmicutes;c__Bacilli;o__RFN20;f__CAG-288;g__UBA7642;s__	N/A	PacBio Sequel II	17	81.09	4.49	1.11039	0.080078	49.28	65316
UW_MP_BIF12_1		JALCCV000000000	UW_MP_USB	UFMP-fed upflow sludge blanket bioreactor (Walters et al., 2022)	d__Bacteria;p__Actinobacteriota;c__Actinomycetia;o__Actinomycetales;f__Bifidobacteriaceae;g__Bifidobacterium;s__	N/A	Illumina NovaSeq S4	53	94.72	2.27	2.14993	0.056899	60.7	40564
UW_MP_BIF13_1		JAKVKQ000000000	UW_MP_USB	UFMP-fed upflow sludge blanket bioreactor (Walters et al., 2022)	d__Bacteria;p__Actinobacteriota;c__Actinomycetia;o__Actinomycetales;f__Bifidobacteriaceae;g__Bifidobacterium;s__	N/A	Illumina NovaSeq S4	24	88.64	1.36	2.03669	0.145914	48.58	84862
UW_MP_BIF17_1		JAKVKW000000000	UW_MP_USB	UFMP-fed upflow sludge blanket bioreactor (Walters et al., 2022)	d__Bacteria;p__Actinobacteriota;c__Actinomycetia;o__Actinomycetales;f__Bifidobacteriaceae;g__Bifidobacterium;s__Bifidobacterium minimum	GCF_000741645.1	Illumina Novaseq S4	68	89.08	0.66	1.48767	0.027143	63.22	21877
UW_MP_BIF19_1		JALCCT000000000	UW_MP_USB	UFMP-fed upflow sludge blanket bioreactor (Walters et al., 2022)	d__Bacteria;p__Actinobacteriota;c__Actinomycetia;o__Actinomycetales;f__Bifidobacteriaceae;g__Bifidobacterium;s__	N/A	Illumina NovaSeq S4	22	81.29	1.21	1.76082	0.139106	58.77	80037
UW_MP_BIF3_1		JALCLM000000000	UW_MP_USB	UFMP-fed upflow sludge blanket bioreactor (Walters et al., 2022)	d__Bacteria;p__Actinobacteriota;c__Actinomycetia;o__Actinomycetales;f__Bifidobacteriaceae;g__Bifidobacterium;s__	N/A	PacBio Sequel II	1	98.86	0.91	2.34226	2.34226	48.81	2342264
UW_MP_BUL1_1		JAKVKC000000000	UW_MP_USB	UFMP-fed upflow sludge blanket bioreactor (Walters et al., 2022)	d__Bacteria;p__Firmicutes;c__Bacilli;o__Erysipelotrichales;f__Erysipelotrichaceae;g__Bulleidia;s__	N/A	Illumina NovaSeq S4	40	96.05	0.79	2.07547	0.073713	45.23	51886
UW_MP_BUL3_1		JAKVKD000000000	UW_MP_USB	UFMP-fed upflow sludge blanket bioreactor (Walters et al., 2022)	d__Bacteria;p__Firmicutes;c__Bacilli;o__Erysipelotrichales;f__Erysipelotrichaceae;g__Bulleidia;s__	N/A	Illumina NovaSeq S4	85	81.19	1.27	1.98877	0.030486	48.8	23397
UW_MP_BURK1_1		JAKVIY000000000	UW_MP_USB	UFMP-fed upflow sludge blanket bioreactor (Walters et al., 2022)	d__Bacteria;p__Proteobacteria;c__Gammaproteobacteria;o__Burkholderiales;f__Burkholderiaceae;g__Kerstersia;s__Kerstersia gyiorum	GCF_004216755.1	Illumina NovaSeq S4	67	98.33	0	3.75589	0.081143	62.56	56058
UW_MP_BURK4_1		JAKVJP000000000	UW_MP_USB	UFMP-fed upflow sludge blanket bioreactor (Walters et al., 2022)	d__Bacteria;p__Proteobacteria;c__Gammaproteobacteria;o__Burkholderiales;f__Burkholderiaceae;g__Alcaligenes;s__Alcaligenes aquatilis	GCF_003076515.1	Illumina NovaSeq S4	131	79.99	0.18	3.13756	0.02675	56.11	23950
UW_MP_EGG1_1		JAKVJR000000000	UW_MP_USB	UFMP-fed upflow sludge blanket bioreactor (Walters et al., 2022)	d__Bacteria;p__Actinobacteriota;c__Coriobacteriia;o__Coriobacteriales;f__Eggerthellaceae;g__UBA5808;s__UBA5808 sp002417975	GCA_002417975.1	Illumina Novaseq S4	62	89.85	0.81	1.73397	0.034929	46.51	27967
UW_MP_ENTER3_1		JAKVJC000000000	UW_MP_USB	UFMP-fed upflow sludge blanket bioreactor (Walters et al., 2022)	d__Bacteria;p__Proteobacteria;c__Gammaproteobacteria;o__Enterobacterales;f__Enterobacteriaceae;g__Proteus;s__Proteus vulgaris	GCF_901472505.1	Illumina NovaSeq S4	30	99.46	0	3.91249	0.216552	37.82	130416
UW_MP_MIC1_1		JALCCL000000000	UW_MP_USB	UFMP-fed upflow sludge blanket bioreactor (Walters et al., 2022)	d__Bacteria;p__Actinobacteriota;c__Actinomycetia;o__Actinomycetales;f__Microbacteriaceae;g__;s__	N/A	Illumina NovaSeq S4	53	83.82	0.58	1.2075	0.032353	66.2	22783
UW_MP_MORAX1_1		JAKVJF000000000	UW_MP_USB	UFMP-fed upflow sludge blanket bioreactor (Walters et al., 2022)	d__Bacteria;p__Proteobacteria;c__Gammaproteobacteria;o__Pseudomonadales;f__Moraxellaceae;g__Acinetobacter;s__Acinetobacter populi	GCF_002174125.1	Illumina Novaseq S4	62	97.48	0	3.31708	0.082347	40.29	53501
UW_MP_MORAX2_1		JAKVJG000000000	UW_MP_USB	UFMP-fed upflow sludge blanket bioreactor (Walters et al., 2022)	d__Bacteria;p__Proteobacteria;c__Gammaproteobacteria;o__Pseudomonadales;f__Moraxellaceae;g__Acinetobacter;s__Acinetobacter gerneri	GCF_000368565.1	Illumina NovaSeq S4	48	84.98	0.86	4.04085	0.119159	37.58	84184
UW_MP_PREV1_1		JAKVNY000000000	UW_MP_USB	UFMP-fed upflow sludge blanket bioreactor (Walters et al., 2022)	d__Bacteria;p__Bacteroidota;c__Bacteroidia;o__Bacteroidales;f__Bacteroidaceae;g__Prevotella;s__	N/A	PacBio Sequel II	1	97.64	2.11	3.41202	3.41202	43.8	3412017
UW_MP_PREV8_1		JALCDD000000000	UW_MP_USB	UFMP-fed upflow sludge blanket bioreactor (Walters et al., 2022)	d__Bacteria;p__Bacteroidota;c__Bacteroidia;o__Bacteroidales;f__Bacteroidaceae;g__Prevotella;s__	N/A	Illumina NovaSeq S4	82	80.41	2.45	1.95205	0.030242	44.83	23805
UW_MP_PROP1_1		JALCLH000000000	UW_MP_USB	UFMP-fed upflow sludge blanket bioreactor (Walters et al., 2022)	d__Bacteria;p__Actinobacteriota;c__Actinomycetia;o__Propionibacteriales;f__Propionibacteriaceae;g__Acidipropionibacterium;s__	N/A	PacBio Sequel II	26	91.48	1.32	3.68169	0.239532	67.84	141603
UW_MP_STREP2_1		JAKVKP000000000	UW_MP_USB	UFMP-fed upflow sludge blanket bioreactor (Walters et al., 2022)	d__Bacteria;p__Firmicutes;c__Bacilli;o__Lactobacillales;f__Streptococcaceae;g__MMGLQ5-1;s__	N/A	Illumina NovaSeq S4	41	94.04	0.66	2.51678	0.078287	35.05	61384
UW_TS_ACET3_1		JAKVME000000000	UW_TS	Starch-ethanol thin stillage fed bioreactor (Fortney et al., 2022)	d__Bacteria;p__Proteobacteria;c__Alphaproteobacteria;o__Acetobacterales;f__Acetobacteraceae;g__Acetobacter;s__	N/A	PacBio Sequel II	3	99.75	0	3.70815	2.63608	57.64	1236049
UW_TS_ACET6_1		JALCKK000000000	UW_TS	Starch-ethanol thin stillage fed bioreactor (Fortney et al., 2022)	d__Bacteria;p__Proteobacteria;c__Alphaproteobacteria;o__Acetobacterales;f__Acetobacteraceae;g__Acetobacter;s__Acetobacter indonesiensis	GCF_000963945.1	Illumina NovaSeq S4	23	89.05	0	2.33673	0.133774	55.1	101596
UW_TS_ANEURI1_1		JALCKS000000000	UW_TS	Starch-ethanol thin stillage fed bioreactor (Fortney et al., 2022)	d__Bacteria;p__Firmicutes;c__Bacilli;o__Aneurinibacillales;f__Aneurinibacillaceae;g__Aneurinibacillus;s__Aneurinibacillus aneurinilyticus	GCF_000466385.1	Illumina Novaseq S4	94	99.22	1.68	5.04213	0.088132	43.61	53639
UW_TS_BAC1_1		JALCJO000000000	UW_TS	Starch-ethanol thin stillage fed bioreactor (Fortney et al., 2022)	d__Bacteria;p__Firmicutes;c__Bacilli;o__Bacillales;f__Bacillaceae_C;g__Bacillus_E;s__Bacillus_E coagulans_A	GCF_000169195.2	Illumina NovaSeq S4	37	98.36	0	3.02991	0.128955	47.02	81889
UW_TS_BAC2_1		JALCJX000000000	UW_TS	Starch-ethanol thin stillage fed bioreactor (Fortney et al., 2022)	d__Bacteria;p__Firmicutes;c__Bacilli;o__Bacillales;f__Bacillaceae_C;g__Bacillus_U;s__Bacillus_U oleronius	GCF_002009555.1	Illumina NovaSeq S4	78	97.76	0.32	4.97713	0.101624	34.81	63809
UW_TS_BUL1_1		JAKVNK000000000	UW_TS	Starch-ethanol thin stillage fed bioreactor (Fortney et al., 2022)	d__Bacteria;p__Firmicutes;c__Bacilli;o__Erysipelotrichales;f__Erysipelotrichaceae;g__Bulleidia;s__Bulleidia massiliense	GCF_900343155.1	PacBio Sequel II	1	100	0.32	2.68156	2.68156	47.21	2681559
UW_TS_CLOS1_1		JALCJE000000000	UW_TS	Starch-ethanol thin stillage fed bioreactor (Fortney et al., 2022)	d__Bacteria;p__Firmicutes_A;c__Clostridia;o__Clostridiales;f__Clostridiaceae;g__Clostridium;s__Clostridium beijerinckii	GCF_002006445.1	Illumina NovaSeq S4	77	99.19	1.61	5.47916	0.1265	29.62	71157
UW_TS_COMLAC1_1		JAKVMK000000000	UW_TS	Starch-ethanol thin stillage fed bioreactor (Fortney et al., 2022)	d__Bacteria;p__Firmicutes;c__Bacilli;o__Lactobacillales;f__Lactobacillaceae;g__Companilactobacillus;s__	N/A	PacBio Sequel II	1	99.48	1.05	2.66695	2.66695	38.26	2666950
UW_TS_FURLAC1_1		JAKVNO000000000	UW_TS	Starch-ethanol thin stillage fed bioreactor (Fortney et al., 2022)	d__Bacteria;p__Firmicutes;c__Bacilli;o__Lactobacillales;f__Lactobacillaceae;g__Furfurilactobacillus;s__	GCF_013394045.1	PacBio Sequel II	1	99.46	1.36	2.55288	2.55288	43.59	2552882
UW_TS_LAC1_1		JAKVNP000000000	UW_TS	Starch-ethanol thin stillage fed bioreactor (Fortney et al., 2022)	d__Bacteria;p__Firmicutes;c__Bacilli;o__Lactobacillales;f__Lactobacillaceae;g__Lactobacillus;s__Lactobacillus crispatus	GCF_002088015.1	PacBio Sequel II	1	98.86	0	2.31006	2.31006	36.65	2310059
UW_TS_LAC2_1		JAKVNQ000000000	UW_TS	Starch-ethanol thin stillage fed bioreactor (Fortney et al., 2022)	d__Bacteria;p__Firmicutes;c__Bacilli;o__Lactobacillales;f__Lactobacillaceae;g__Lactobacillus;s__Lactobacillus amylovorus	GCF_002706375.1	PacBio Sequel II	4	98.12	0.06	2.10629	1.25801	37.9	526572
UW_TS_LAC3_1		JAKVNR000000000	UW_TS	Starch-ethanol thin stillage fed bioreactor (Fortney et al., 2022)	d__Bacteria;p__Firmicutes;c__Bacilli;o__Lactobacillales;f__Lactobacillaceae;g__Lactobacillus;s__	N/A	PacBio Sequel II	1	92.18	0.52	1.55509	1.55509	42.52	1555094
UW_TS_LAC4_1		JAKVMO000000000	UW_TS	Starch-ethanol thin stillage fed bioreactor (Fortney et al., 2022)	d__Bacteria;p__Firmicutes;c__Bacilli;o__Lactobacillales;f__Lactobacillaceae;g__RHOV01;s__RHOV01 sp003946675	GCF_003946675.1	PacBio Sequel II	26	89.97	3.32	2.26341	0.124361	40.74	87054
UW_TS_LAC5_1		JAKVLG000000000	UW_TS	Starch-ethanol thin stillage fed bioreactor (Fortney et al., 2022)	d__Bacteria;p__Firmicutes;c__Bacilli;o__Lactobacillales;f__Lactobacillaceae;g__Lactobacillus;s__Lactobacillus amylovorus	GCF_002706375.1	Illumina NovaSeq S4	47	88.54	0	1.56785	0.046197	38.21	33358
UW_TS_LAC6_1		JALCDX000000000	UW_TS	Starch-ethanol thin stillage fed bioreactor (Fortney et al., 2022)	d__Bacteria;p__Firmicutes;c__Bacilli;o__Lactobacillales;f__Lactobacillaceae;g__Lactobacillus;s__	N/A	Illumina NovaSeq S4	15	75.86	0	0.807589	0.072248	44.2	53839
UW_TS_LACCAS2_1		JALCDR000000000	UW_TS	Starch-ethanol thin stillage fed bioreactor (Fortney et al., 2022)	d__Bacteria;p__Firmicutes;c__Bacilli;o__Lactobacillales;f__Lactobacillaceae;g__Lacticaseibacillus;s__Lacticaseibacillus songhuajiangensis	GCF_003946025.1	Illumina NovaSeq S4	39	87.43	1.05	1.5669	0.056523	53.01	40176
UW_TS_LACPLAN1_1		JAKVLM000000000	UW_TS	Starch-ethanol thin stillage fed bioreactor (Fortney et al., 2022)	d__Bacteria;p__Firmicutes;c__Bacilli;o__Lactobacillales;f__Lactobacillaceae;g__Lactiplantibacillus;s__Lactiplantibacillus pentosus	GCF_003641185.1	Illumina NovaSeq S4	35	91.36	1.39	2.63834	0.133313	46.91	75381
UW_TS_LCO1_1		JAKVMP000000000	UW_TS	Starch-ethanol thin stillage fed bioreactor (Fortney et al., 2022)	d__Bacteria;p__Firmicutes_A;c__Clostridia;o__Lachnospirales;f__Lachnospiraceae;g__UBA1066;s__UBA1066 sp900315305	GCA_900315305.1	PacBio Sequel II	1	97.93	0	2.77611	2.77611	54.56	2776109
UW_TS_LCO2_1		JAKVND000000000	UW_TS	Starch-ethanol thin stillage fed bioreactor (Fortney et al., 2022)	d__Bacteria;p__Firmicutes_A;c__Clostridia;o__Lachnospirales;f__Lachnospiraceae;g__UBA4285;s__UBA4285 sp900314255	GCA_900314255.1	PacBio Sequel II	2	97.76	0	2.95901	2.29557	53.04	1479506
UW_TS_LCO4_1		JAKVNF000000000	UW_TS	Starch-ethanol thin stillage fed bioreactor (Fortney et al., 2022)	d__Bacteria;p__Firmicutes_A;c__Clostridia;o__Lachnospirales;f__Lachnospiraceae;g__CAG-791;s__	N/A	Illumina Novaseq S4	4	96.55	1.26	4.30013	0.930953	56.63	1075033
UW_TS_LCO5_1		JALCER000000000	UW_TS	Starch-ethanol thin stillage fed bioreactor (Fortney et al., 2022)	d__Bacteria;p__Firmicutes_A;c__Clostridia;o__Lachnospirales;f__Lachnospiraceae;g__Eubacterium_H;s__Eubacterium_H sp900318755	GCA_900318755.1	Illumina Novaseq S4	56	95.22	0.64	2.22126	0.047465	55.08	39665
UW_TS_LEVLAC1_1		JAKVLN000000000	UW_TS	Starch-ethanol thin stillage fed bioreactor (Fortney et al., 2022)	d__Bacteria;p__Firmicutes;c__Bacilli;o__Lactobacillales;f__Lactobacillaceae;g__Levilactobacillus;s__Levilactobacillus sp004745505	GCF_004745505.1	Illumina NovaSeq S4	9	99.38	0	2.68455	0.462158	52.45	298283
UW_TS_LIMLAC2_1		JALCDW000000000	UW_TS	Starch-ethanol thin stillage fed bioreactor (Fortney et al., 2022)	d__Bacteria;p__Firmicutes;c__Bacilli;o__Lactobacillales;f__Lactobacillaceae;g__Limosilactobacillus;s__Limosilactobacillus timonensis	GCF_900240275.1	Illumina Novaseq S4	33	89.67	0.07	1.28042	0.083384	47.61	38800
UW_TS_PAENI1_1		JALCKG000000000	UW_TS	Starch-ethanol thin stillage fed bioreactor (Fortney et al., 2022)	d__Bacteria;p__Firmicutes;c__Bacilli;o__Paenibacillales;f__Paenibacillaceae;g__Paenibacillus;s__Paenibacillus lautus_A	GCF_002407025.1	Illumina Novaseq S4	102	98.63	0.8	6.67806	0.102579	51.51	65471
UW_TS_PED1_1		JAKVLZ000000000	UW_TS	Starch-ethanol thin stillage fed bioreactor (Fortney et al., 2022)	d__Bacteria;p__Firmicutes;c__Bacilli;o__Lactobacillales;f__Lactobacillaceae;g__Pediococcus;s__Pediococcus acidilactici	GCF_000146325.1	PacBio Sequel II	1	98.77	0	1.93112	1.93112	42.28	1931124
UW_TS_PED2_1		JAKVNG000000000	UW_TS	Starch-ethanol thin stillage fed bioreactor (Fortney et al., 2022)	d__Bacteria;p__Firmicutes;c__Bacilli;o__Lactobacillales;f__Lactobacillaceae;g__Pediococcus;s__Pediococcus pentosaceus	GCF_001437285.1	PacBio Sequel II	1	98.77	0	1.66113	1.66113	37.39	1661130
UW_TS_PED3_1		JALCDU000000000	UW_TS	Starch-ethanol thin stillage fed bioreactor (Fortney et al., 2022)	d__Bacteria;p__Firmicutes;c__Bacilli;o__Lactobacillales;f__Lactobacillaceae;g__Pediococcus;s__Pediococcus acidilactici	GCF_000146325.1	Illumina NovaSeq S4	68	80.26	0.62	1.48238	0.023948	42.45	21799

## Sheet: Table S2A
Table S2A.	Amino acid sequence for Acetobacterium woodii lctD electron confurcating dehydrogenase (Weghoff et al., 2015) used in tblastn analysis to find gene homologues.
>lctD (awo 0873 - WP_014355267.1) electron confurcating lactate dehydrogenase (ecLDH) - Acetobacterium woodii (strain ATCC 29683; DSM 1030)
MNYKKVEASDIAAIKELIPAERVFVGTEIGEDFSHDELGSIHSYPEVLIKVTSTEEVSKIMKYAYEHNIPVVVRGSGTGLVGACVPLFGGIMLETTLMNNILELDTENLTVTVEPGVLLMELSKFVEENDLFYPPDPGEKSATIAGNISTNAGGMRAVKYGVTRDYVRGLTVVLANGEIIELGGKIVKNSSGYSLKDLVIGSEGTLCVITKAILKLLPLPKMTLSLLIPFENISDAAGIVPKIIKSKAIPTAIEFMERQTILFAEDFLGKKFPDSSSNAYILLTFDGNTKEQVEAEYETVANLCLAEGAKDVYIVDTVERKDSVWSARGAFLEAIKASTTEMDECDVVVPRNRIAEFIEFTHDLAKEMDVRIPSFGHAGDGNLHIYVCRDELCQADWEA…

## Sheet: Table S2B
Table S2B. Amino acid sequences for lactose permeases used in tblastn analysis to find homologues.
The first sequence is from the transporter classification database (Saier et al., 2021)
The "UW_MP_CLOS1 lactose permease homologue" is a lactose permease predicted within the CLOS1 MAG by the initial tblastn search and used in a subsequent tblastn search to further predict lactose permeases within our other MAGs
>gnl|TC-DB|ACV04919|2.A.1.1.141 lactose permease [Aspergillus nidulans] (from transporter classification database)
MADEKTVQPSAEQEAVGEAEEVRVAHDALNAKYSPLTWSMFRLYLCLIIPYLCGTLNGYD
GSLMGGLNAMETYLDFFNMETSGSSTGIVFALYNIGSIPAVFFTGPVNDYWGRRCGMFVG
ALIIVIGTCIQSPSVNRGMFLAGRFILGFGVSFCCVSAPCYVSEMAHPAWRGTITGLYNC
TWYIGSILASWVVYGCSQLDNANSFRIPIWCQLISSALVVLGVWFIPESPRWLMAQDRAE
DAAKILTRYHGENDPDHPLVHLQLKEMQQSIATDASDKKWWDYRELYTGHSARRRLICVL
GMACFGQISGNSVTSYYLPVMLENAGIVSESRKLLFNGIYPPLSLIGAVVGARMTDTIGR
RPLLIYSLLFCSVAFAIITGTSKLATDDPTNTAAANTTIAFIYLFGIVFSFGWTPLQSMY
IAETLTTTTRAKGTAVGNLASSIASTIIQYSSGPAFKDIQYYFYLVFVFWDLIEIVIMYF
YFPETKDRTLEELEEVFSAPNPVKRSLVKRDAATVLNTMQVEQRELVSKEAQV
>UW_MP_CLOS1 lactose permease homologue
IISTFGGLLFGYDTGVINGALTFMTRSDQLNLNSLTEGLVTSALLFGAALGAVFGGHLSDRYGRRTILKLLAIIFFLATIGCSISPNASVIISCRFILGLAVGGASVIVPTFLSEMAPTDKRGSIVSQNELMIVSGQLLAYVFNAILGNLFSDPGIWRYMIAIATIPAVVLWFGMMVVPETPRWLAANGKNQKALEILKRLRSETEAEIELKGIQENIQKEKNLNRATFKDLNIPWIRRLILIGIGIGIIQQIAGINIMMYYGTTVLEKAGFGVGAALIANIGNGSMAVIATIVYMRFFANRIKRRSMLLIGYTGSTLSMLSIAVLTNLLEGWSILPYLVIILTMSFLAFFQGTVGPVIWLVLSEIFPLRLRGFGMGISAFFLWTANFCVGLVFPTLLS…

## Sheet: Table S2C
Table S2C. Amino acid sequences for lactose-specific PTS permease components used in tblastn analysis to find homologues.
Each sequence is from the transporter classification database (Saier et al., 2021)
Predictions for the lactose PTS permease complex are considered positive if they homologues for each component (A-C)
>gnl|TC-DB|P11162|4.A.3.1.1 PTS system, lactose-specific IIBC component (EIIBC-LAC) (Lactose- permease IIBC component) (Phosphotransferase enzyme II, BC component) (EC 2.7.1.69) (EII-LAC) - Staphylococcus aureus. (from transporter classification database)
MMQKLIAQIEKGKPFFEKLSRNIYLRAIRDGFISAMPVILFSSIFLLIAYVPNIFGFKWD
KGMEAILMKPYNYTMGLVAFLVAGTTAKSLTDSFNRKLESTNQINFISTMQAAMCGFLFL
ASDPAKDGGFLSAFMGTKGLLTAFLSAFVTVIVYNFCVKRNITIKMPKEVPPNISQVFKD
LIPFSAVIIILYALDLVIRNSFKSNVAEGILKLFEPLFTAADGWIGVTIIFGAFALFWFV
GIHGPSIVEPAIAAITYANIEANFKLLQAGEHADKIITSGTQMFIVTFGGTGATLVVPFM
FMWMTKSKRNKAIGRASVVPTFFGVNEPILFGAPLVLNPVFFIPFVLAPIVNVWIFKLFV
EVLGMNSFSVNLPWTTPGPLGIIMGTGFGLWSFVLAITLIVVDIIIYYPFLKVYDSEILD
EEEGRKESNSDLKEKVAANFDTKKADSILAASGVSDDAAKASNITEQTNVLVLCAGGGTS
GLLANALNKAAEEYHVPVKAAAGGYGAHMDIMKEYQLIILAPQVASNYEDIKQDTDRLGI
KLAKTQGAEYIKLTRDGQAALDFVQQQFEN
>gnl|TC-DB|Q045H3|4.A.3.1.3 PTS system lactose-specific IIB component, Lac family / PTS system lactose-specific IIC component, Lac family OS=Lactobacillus gasseri (strain ATCC 33323 / DSM 20243) GN=LGAS_0501 PE=4 SV=1 (from transporter classification database)
MNGFTKAMDKMKPKFEKIAANPYVSAVRDGFIAAMPIILFSSLFTLIAYVPNAWGFYWPK
AVENALVLPYSYSMGLLALYVTATCAKNLTDYKNLKLPKTNQINPMNVILAAEISFIIIA
IKVGKNGLDLTYLGTQGLIASYIVGLIVPNIYYACVKNNVTIKMPDVVPQNIAQTFKDIF
PTTFSVALFWIVQIILNQLFGANLSECVVKVLSPLFHASDTYGGLALVAGAMAFFWFVGV
QGPSIVAPAVAAIETTNVGLNQQLVHAGMQASHALTINCQDYVMNMGGTGSTFVVPFIFL
LLAKSAQNKAAGKAAVIPGCFSVNEPILFGAPIIMNPVFFIPFLVTPMFNVCAYKFFVQV
LHMNALYNTLPWTVPAPIGIIVSSGFAGLSFVYVILTLVVDTLIWIPFFKFYDNDLYKQE
QAKLAAEKAAGVATATDDSTASLAATDKEAKEGITKDTNVMVICAGGGTSGILAKALNKM
AKERNLPLHAAARAYGQHMDIIHDMDLIILAPQMDSMKDNLKEIADHDGSKLVTTTGRQY
IELTQKPDLAFKFVVDSLEGKNEDK
>gnl|TC-DB|Q045X3|4.A.3.1.2 PTS system lactose-specific IIB component, Lac family / PTS system lactose-specific IIC component, Lac family OS=Lactobacillus gasseri (strain ATCC 33323 / DSM 20243) GN=LGAS_0343 PE=4 SV=1 (from transporter classification database)
MDGLVKRIEKAQPFFRKVATNQYLRAIRDGFIALMPIIIFSSFFLLIANVPQIWGFVWPK
KVATALNLFYNLSMGFLSLMAASTVAKALTGSLNLKLPKTNQIPVAGVQYTAQISFAFVA
IDTLLNKGNLYLATDMIGTKGLICAFLVAFIVPNIYYFCFKHNVTITLPDVVPQNIAQAF
KNIVPFAIATTFFWAFTLIFRALTNMNLAAWIIKSLTPLFTAADGYVGLAIIYGAMAFFW
FIGIQGPSIVEPAVTAIYLTNVEANLRAFNSGNIQGANHILSQGIQMFVATLGGTGATLV
VTFMFAFLSKSKQLKAVGRASTIPVIFGVNEPILFGAPLILNPIFFIPFIFAPILNVWIF
KIFVDVLHMPSFIYNLPWTTPPTLGLWMGTGFNILALLLGILLLVVDSLLYYPFFKAYDA
SMLAQEEKKEELEEKDNKKSVVSSAEPKFNESEIPLGKTKDQQALNVLVLCAGGGTSGIL
AKSLNKLAKEDKLPLNAAAAAFGSHHDLISGMDVVILAPQMDTMKDELAKECKQNNARMI
TTTGKQYIYMTQHANECLKLLINDINK
>gnl|TC-DB|Q045X4|4.A.3.1.2 PTS system lactose-specific IIA component, Lac family OS=Lactobacillus gasseri (strain ATCC 33323 / DSM 20243) GN=LGAS_0342 PE=4 SV=1 (from transporter classification database)
MVSKEEISMVGFTIVAYAGDAKTDLLNALKLAREGKFEEAEKLIEEANNSLVDAHNAQTK
LMSQEASGEELETTFIMSHGQDTLMTTMLLRDEVKYFIDLYKQNLALRAEIEQLKEKMN
>gnl|TC-DB|U5MFA1|4.A.3.2.9 PTS lactose transporter subunit IIC OS=Klebsiella pneumoniae CG43 GN=D364_16500 PE=4 SV=1
MALQDKLIDALGRFATTFNSYRYIMAIKSAFITLMPVIIVGAFSVLISNMVLDPKNGLAS
FSSLSFLAALKPITSALNYATLNFLNIGAVFLIGIELGRINGIKSLFPGLLAVICFICVT
PTTVEMMVDGQMHVVKDVLLRQFSDTRSLFLGMFIAILSVEIYCWLEGRKGLKIKMPDTV
PPNVSASFSALIPAIITTTAIATFGFLFHQLTGMYLYDAVYQVVQQPLERVVQSLPGILL
LMFVAQLFWVIGIHGNQMIKPIREPLLLGAITVNMSAFEQGKEVPNIITMPFWDVYMSIG
GSGLTIGLLIAVMIATRRKEMKEIAKLSIGPGLFNINEPVIFGMPIMLNPILAIPFIITP
LVTGSIGYFATLTGFAGKAVVMVPWTTPPLINAWLSTAGSMGAVVTQLICIVVAVLIYLP
FVKIATRRADAAQRQVDNQQTANPV
>gnl|TC-DB|U5MIE1|4.A.3.2.9 PTS lactose transporter subunit IIB OS=Klebsiella pneumoniae CG43 GN=D364_23635 PE=4 SV=1 (from transporter classification database)
MPRIVLYCAAGMSTSMLVNKMKAEAQQRALALEIYAVAVAEFERELPHADVILLGPQVKY
EAGRLAALAAPQGKAVAVIDMADYGMMRGAAVLDKALALLEH
>gnl|TC-DB|U5MLJ3|4.A.3.2.9 PTS lactose transporter subunit IIA OS=Klebsiella pneumoniae CG43 GN=D364_22245 PE=4 SV=1
MEDLETIIMELLVNAGSARSAALTALQLARKGDFAAAEQAMAESHEFVKHAHKIQTQLIG
MDEGSGKLPVNLITVHSQDHLMNAMVIQDLATDMIELYRRLPLAQ

## Sheet: Table S2D
Table S2D. Amino acid sequences for lactate permeases used in tblastn analysis to find gene homologues.
Each gene is from the transporter classification database (Saier et al., 2021)
>gnl|TC-DB|AOY58527|2.A.14.2.2 LldP: L-lactate permease [Desulfococcus multivorans]
MSLGFQSFMAVLPILTAAVLLVGFRWPAKWAMPICYVVAVLISFIFWHVDVVRIVASTIQ
GLFITADILFIIFGAILLLNTLKHSGAISAIRTGFTKISPDRRVQVVLTAWLFGAFIEGA
SGFGTPAAIAAPLMVAIGFPALGAVMIGMMIQSTPVTFGAVGTPILIGVKGGLENPQLTA
LLAEVGMDFSQYLQLITAASAIFHAIAGTLIPTFMVVMMTRFFGRNKSWTEGLSILPFSI
MGGLAFTIPYMLTGIFLGPEFPSLIGALIGMAIMTTAATKGFLVPKDIWDFPPREEWEPG
WMSQMEIKLDALTSKKPMNLTLAWIPYLLVAIILVLTRLGQLPLGTWLKSVKFPWSDILG
TGISAAFVPLYLPGAILCFVVLITYFLHKMSWNELSLAIKESSSILLGAGFVLIFTIPMV
RVYINSGVNAAGYSSMPLAMAEWVAANVGQVWPFFAPLIGALGAFIAGSNTVSNLMFSLF
QHGVAQNLAISGVVVVALQAVGAAAGNMFCIHNVVAASATVGLLGQEGNTLRRTIIPTLY
YCILVGILGLLVIYAMGYHDPLNAYLVSR
>gnl|TC-DB|P71067|2.A.14.1.3 L-lactate permease OS=Bacillus subtilis (strain 168) GN=lutP PE=1 SV=2
MQWTQAYTPIGGNLLLSALAALVPIIFFFWALAIKRMKGYTAGLATLGIALIIAVLVYRM
PAEKALMSATQGAVYGLLPIGWIIVTSVFLYKITVKTGQFDIIRSSVLSITDDRRLQALL
IAFSFGAFLEGAAGFGAPVAISAALLVGLGFNPLYAAGICLIANTAPVAFGAIGIPITAV
EGPTGIPAMEISQMVGRQLPFLSVFIPLYLIIIMSGFRKALEIWPAILVSGVSFAVVQYL
SSNFLGPELPDVLSALVSMAALAVFLKWWKPKTTFRFAGEQESAASIETARTNPAAPAYR
GGQIFKAWSPFLLLTAMISVWGIPSVKSALTGHYEGSAVFLKWLNAVGEKLTFSPGVPFL
NNQIVNADGTPIEAVYKLEVLGSAGTAILIAAVLSKFITAISWKDWGTVFKETVQELKLP
ILTIASVVGFAYVTNSSGMSTTLGMTLALTGSMFTFFSPVLGWLGVFITGSDTSANLLFG
NLQKVTALSVGMDPVLSVAANSSGGVTGKMISPQSIAVACAAVGLAGKESDLFRFTIKHS
LFLLLLVCIITFLQHHVFSWMIP
>gnl|TC-DB|Q57251|2.A.14.2.1 Putative L-lactate permease - Haemophilus influenzae.
MLSFILSIFPIVLLIYLMVKRNALPSYVALPWVATLVMGVHLLHFNTDIVTISANVVSAI
IAVQTPITVIFGAILFNRFSEISGATNIMRKWLGNINPNPVAQLMIIGWAFAFMIEGASG
FGTPAAIAAPILVGLGFHPLKVAMLALIMNSVPVSFGAVGTPTWFGFGALKLSEDMILEI
GSITAFIHSIAALIIPLLALRILVNWDDIRKNIVFIYISVLGCVVPYFLIAQVNYEFPSL
VGGAIGLFISVWAANRNIGLAKVTNTLDNNAVSAGEVVKALFPTGLLIAFLIVTRIHQLP
FKAMMNDATIWFSTTLGSLGLFEISKGLIFSLKNIFGSNVSSSYKLLYVPALIPFVITVL
IAIPFFKISSSNVKQILVSSLQQSKNPFIALIGALVMVNLMLVGGEHSMVKIIGRTFAEI
SGSNWTIFSSFLGAIGSFFSGSNTVSNLTFGSVQLSTAETTGISVALVLALQSVGGAMGN
MVCINNIVAVSSVLNISNQEGTIIKKTIIPMIIYGIIAALGALFLVPLFYNL
>gnl|TC-DB|Q8TUV1|2.A.14.1.4 L-lactate permease - Methanopyrus kandleri.
MRLYRRRDPEPQSPSSSEGGLPLPSLALVVPLISISALIVAALRGWGLFRASSLSLALYL
IASTFTPFTVQVPYVRVVDSALKGVEILAVVLASLTLVEMMREDGVLEDIVHILKETCQL
RGPCLVGLSVVATGAFESVASFGTPATLVGPLLVEAGLSKTTAAAAALVGHAPFGVFAAF
GVPILVTSGVSGIDPKKLSFDVALCIAPSLLVLPYAVAETADLRVSKVLLTTMGIMTTAS
LLAVWWVASPSIVGPLLVLGVASGFLWYLRVAGEEARIKVSNDTIKGMIVYGLVVVGIGV
VKALDVKWVQPWMLLWVAVLLYATPRWTRMVGALIRVLRKTWEELLSIVLLMVLGTLIAH
SELPSAIRPYAGSPLVTFLVGFMGEMVVGSTTAVMATFASGTPYPEITLAGAACAAAACP
YNVAVAAAAVRCHEKRVMRRSLLGSMYLTVPTLAWCTMLWIWGAMK

## Sheet: Table S3
Table S3. Summary of the predicted homologues within the most abundant MAGs in our community and the basis for each prediction.
Predictions for the lactose PTS permease complex are considered positive if the genome contains homologues for each component (A-C)
EC/KO/COG numbers and gene product names were found within the JGI annotation files for each MAG (https://github.com/GLBRC/UFMP-metagenomics).
The amino acid sequences used in each tblastn analysis are provided in Table S2.
Functional prediction of electron transfer flavoproteins (A and B) determined by phylogenetic analysis described in methods (Figure 4)
Pathway	Gene_ID	Name	Basis for gene prediction	SPH2	ATO3	ATO6	BIF2	BIF11	BIF18	ACT2	ACID1	CLOS1	LCO1
Lactose permease	LacS	lactose/raffinose/galactose permease	K16209	0	0	0	1	0	0	0	0	0	1
Lactose permease	LacS	Lactose permease	Transporter database - Table S2A (tBLASTn)	0	0	0	0	0	0	0	0	2	0
Lactose permease	LacS	Lactose permease	Predicted lactose permease within CLOS1 - Table S2A (tBLASTn)	0	0	0	2	2	0	5	0	3	0
Lactose permease	LacS	Lactose permease	"lactose/L-arabinose transport system permease protein" (gene product name from JGI annotation files)	0	0	0	0	0	0	0	0	0	2
Lactose hydrolysis	BGS	beta-galactosidase	EC:3.2.1.23	4	5	0	1	0	1	3	0	0	7
Lactose hydrolysis	BGS	beta-galactosidase	K01190	4	3	0	1	0	0	1	0	0	5
Lactose hydrolysis	BGS	Beta-galactosidase/beta-glucuronidase [Carbohydrate transport and metabolism]	COG3250	0	0	0	0	0	0	0	0	0	0
Lactose hydrolysis	BGS	Beta-glucosidase/6-phospho-beta-glucosidase/beta-galactosidase [Carbohydrate transport and metabolism]	COG2723	0	0	0	0	1	0	0	0	0	0
Leloir	A1E	aldose 1-epimerase	EC:5.1.3.3	2	1	1	1	1	1	1	0	1	1
Leloir	A1E	aldose 1-epimerase	K01785	2	1	1	1	1	1	1	0	1	1
Leloir	GK	galactokinase	EC:2.7.1.6	4	1	1	1	1	1	1	0	0	1
Leloir	GK	galactokinase	K00849	4	1	1	1	1	1	1	0	0	1
Leloir	UDPT	UDPglucose--hexose-1-phosphate uridylyltransferase	EC:2.7.7.12	1	1	1	1	1	1	1	0	0	1
Leloir	UDPT	UDPglucose--hexose-1-phosphate uridylyltransferase	K00965	1	1	1	1	1	1	1	0	0	1
Leloir	UDPE	UDP-glucose 4-epimerase	EC:5.1.3.2	1	3	2	2	2	1	1	3	1	2
Leloir	UDPE	UDP-glucose 4-epimerase	K01784	1	3	1	2	2	1	1	3	1	2
Leloir	PHGM	Phosphoglucomutase	EC:5.4.2.2	1	1	1	1	1	1	1	0	1	1
Lactose Degradation I (tagatose pathway)	LPTSP	lactose PTS permease	EC:2.7.1.207	0	0	0	0	0	0	0	0	0	0
Lactose Degradation I (tagatose pathway)	LPTSP	lactose PTS permease (components A, B, and C)	Transporter database - Table S2B (tBLASTn)	0	3	0	0	0	0	0	0	1	1
Lactose Degradation I (tagatose pathway)	6PBG	6-phospho-beta-galactosidase	EC:3.2.1.85	0	0	0	0	0	0	0	0	0	0
Lactose Degradation I (tagatose pathway)	Ga6PI	galactose-6-phosphate isomerase	EC:5.3.1.26	0	0	0	0	0	0	0	0	2	0
Lactose Degradation I (tagatose pathway)	T6PK	tagatose-6-phosphate kinase	EC:2.7.1.144	1	1	1	0	0	0	0	0	2	0
Lactose Degradation I (tagatose pathway)	TBPA	tagatose-bisphosphate aldolase	EC:4.1.2.40	0	1	1	0	0	0	0	0	2	0
Glycolysis (Embden-Meyerhof pathway)	HK	Hexokinase	EC:2.7.1.1	1	0	0	0	0	0	0	0	0	0
Glycolysis (Embden-Meyerhof pathway)	HK	Hexokinase	K00844	1	0	0	0	0	0	0	0	0	0
Glycolysis (Embden-Meyerhof pathway)	HK	Hexokinase	EC:2.7.1.2	0	1	2	0	1	0	1	0	1	2
Glycolysis (Embden-Meyerhof pathway)	HK	Hexokinase glucose ATP phosphotransferase	Pathway tools hole filler	0	0	0	1	0	0	0	0	0	0
Glycolysis (Embden-Meyerhof pathway)	G6PI	glucose-6-phosphate isomerase	EC:5.3.1.9	1	1	1	1	1	0	1	1	1	1
Glycolysis (Embden-Meyerhof pathway)	G6PI	glucose-6-phosphate isomerase	K01810	1	1	1	1	1	0	1	1	1	1
Glycolysis (Embden-Meyerhof pathway)	G6PI	glucose-6-phosphate isomerase	K01810	1	1	1	1	1	0	1	1	1	1
Glycolysis (Embden-Meyerhof pathway)	PFK	6-phosphofructokinase	EC:2.7.1.11	2	3	2	0	0	0	2	1	2	3
Glycolysis (Embden-Meyerhof pathway)	PFK	6-phosphofructokinase	K24182	0	0	0	0	0	0	0	0	0	0
Glycolysis (Embden-Meyerhof pathway)	FBA	fructose-bisphosphate aldolase	EC:4.1.2.13	3	3	2	1	1	1	4	1	4	1
Glycolysis (Embden-Meyerhof pathway)	FBA	fructose-bisphosphate aldolase	K01623	1	0	0	0	0	0	1	0	0	0
Glycolysis (Embden-Meyerhof pathway)	TIM	triosephosphate isomerase	EC:5.3.1.1	1	3	1	1	1	1	1	1	1	1
Glycolysis (Embden-Meyerhof pathway)	GAPDH	glyceraldehyde 3-phosphate dehydrogenase	EC:1.2.1.12	1	1	2	1	1	1	2	1	1	1
Glycolysis (Embden-Meyerhof pathway)	GAPDH	glyceraldehyde 3-phosphate dehydrogenase	K00134	1	1	2	1	1	1	2	1	1	1
Glycolysis (Embden-Meyerhof pathway)	PGK	phosphoglycerate kinase	EC:2.7.2.3	1	1	1	1	1	1	1	0	1	1
Glycolysis (Embden-Meyerhof pathway)	PGK	phosphoglycerate kinase	K00927	1	1	1	1	1	1	1	0	1	1
Glycolysis (Embden-Meyerhof pathway)	PGK	phosphoglycerate kinase	Pathway tools hole filler	0	0	0	0	0	0	0	1	0	0
Glycolysis (Embden-Meyerhof pathway)	PGM	2,3-bisphosphoglycerate-dependent phosphoglycerate mutase	EC:5.4.2.11	2	1	0	3	3	2	1	0	0	0
Glycolysis (Embden-Meyerhof pathway)	PGM	phosphoglycerate mutase / cofactor independent phosphoglycerate mutase	EC:5.4.2.12	1	0	0	2	2	2	2	2	2	2
Glycolysis (Embden-Meyerhof pathway)	PGM	2,3-bisphosphoglycerate-dependent phosphoglycerate mutase	K01834	2	1	0	3	3	2	1	0	0	0
Glycolysis (Embden-Meyerhof pathway)	ENO	enolase	EC:4.2.1.11	2	1	1	2	2	1	2	1	1	1
Glycolysis (Embden-Meyerhof pathway)	ENO	enolase	K01689	2	1	1	2	2	1	2	1	1	1
Glycolysis (Embden-Meyerhof pathway)	PYK	pyruvate kinase	EC:2.7.1.40	0	1	1	1	1	1	1	2	1	1
Glycolysis (Embden-Meyerhof pathway)	PYK	pyruvate kinase	K00873	0	1	1	1	1	1	1	2	1	1
Pyruvate oxidation	PFOR	pyruvate ferredoxin oxidoreductase alpha subunit	EC:1.2.7.1	1	1	1	0	0	0	3	3	2	1
Pyruvate oxidation	PFOR	2-oxoglutarate/2-oxoacid ferredoxin oxidoreductase subunit alpha	EC:1.2.7.11	0	0	0	0	0	0	0	6	0	0
Pyruvate oxidation	PFOR	pyruvate ferredoxin oxidoreductase alpha subunit	K00169	0	0	0	0	0	0	1	0	0	0
Pyruvate oxidation	PFL	pyruvate formate lyase	EC:2.3.1.54	0	5	0	2	2	1	1	0	5	1
Pyruvate oxidation	PFL	pyruvate formate lyase	K00656	0	5	0	2	2	1	1	0	5	1
Acetate production	PTA	phosphate acetyltransferase	EC:2.3.1.8	1	1	3	1	1	1	1	1	1	1
Acetate production	ACK	acetate kinase	EC:2.7.2.1	1	1	1	1	1	1	0	1	1	1
Acetate production	ACK	acetate kinase	EC:2.7.2.15	0	0	0	0	0	0	0	0	0	0
Lactic acid production	LDH	L-lactate dehydrogenase	EC:1.1.1.27	0	3	1	1	1	0	0	3	1	1
Lactic acid production	LDH	L-lactate dehydrogenase	K00016	0	3	1	1	1	0	0	3	1	1
Lactic acid production	DLDH	D-lactate dehydrogenase	EC:1.1.1.28	2	2	2	0	1	1	0	1	1	1
Lactic acid production	DLDH	D-lactate dehydrogenase	K03778	2	2	2	0	1	1	0	1	1	1
Ethanol production	ADA	acetaldehyde dehydrogenase	EC:1.2.1.10	1	1	1	1	1	1	0	1	0	0
Ethanol production	ADH	alcohol dehydrogenase / aldehyde reductase	EC:1.1.1.1	1	1	1	3	2	2	2	3	0	1
Bifid shunt	HK	Hexokinase	EC:2.7.1.1	1	0	0	0	0	0	0	0	0	0
Bifid shunt	HK	Hexokinase	K00844	1	0	0	0	0	0	0	0	0	0
Bifid shunt	HK	Hexokinase	EC:2.7.1.2	0	1	2	0	1	0	1	0	1	2
Bifid shunt	HK	Hexokinase glucose ATP phosphotransferase	Pathway tools hole filler	0	0	0	1	0	0	0	0	0	0
Bifid shunt	FPHK	fructose-6-phosphate phosphoketolase	EC:4.1.2.22	0	1	0	1	1	1	0	0	0	0
Bifid shunt	TA	transaldolase	EC:2.2.1.2	1	2	0	1	1	1	2	1	1	1
Bifid shunt	TK	transketolase	EC:2.2.1.1	2	3	1	1	1	1	2	4	4	4
Bifid shunt	R5PI	ribose-5-phosphate isomerase / phosphopentosisomerase	EC:5.3.1.6	1	1	0	1	1	1	3	1	3	1
Bifid shunt	R5PE	ribulose-phosphate 3-epimerase	EC:5.1.3.1	1	2	2	1	1	0	1	1	2	1
Bifid shunt	PKT	phosphoketolase	EC:4.1.2.9	0	1	0	1	1	1	0	0	0	0
Bifid shunt	ACK	acetate kinase	EC:2.7.2.1	1	1	1	1	1	1	0	1	1	1
Bifid shunt	ACK	acetate kinase	EC:2.7.2.15	0	0	0	0	0	0	0	0	0	0
Bifid shunt	GAPDH	glyceraldehyde 3-phosphate dehydrogenase	EC:1.2.1.12	1	1	2	1	1	1	2	1	1	1
Bifid shunt	PGK	phosphoglycerate kinase	EC:2.7.2.3	1	1	1	1	1	1	1	0	1	1
Bifid shunt	PGK	phosphoglycerate kinase	Pathway tools hole filler	0	0	0	0	0	0	0	1	0	0
Bifid shunt	PGM	2,3-bisphosphoglycerate-dependent phosphoglycerate mutase	EC:5.4.2.11	2	1	0	3	3	2	1	0	0	0
Bifid shunt	PGM	phosphoglycerate mutase / cofactor independent phosphoglycerate mutase	EC:5.4.2.12	1	0	0	2	2	2	2	2	2	2
Bifid shunt	ENO	enolase	EC:4.2.1.11	2	1	1	2	2	1	2	1	1	1
Bifid shunt	PYK	pyruvate kinase	EC:2.7.1.40	0	1	1	1	1	1	1	2	1	1
Bifid shunt	LDH	L-lactate dehydrogenase	EC:1.1.1.27	0	3	1	1	1	0	0	3	1	1
Bifid shunt	LDH	L-lactate dehydrogenase	K00016	0	3	1	1	1	0	0	3	1	1
Bifid shunt	DLDH	D-lactate dehydrogenase	EC:1.1.1.28	2	2	2	0	1	1	0	1	1	1
Bifid shunt	DLDH	D-lactate dehydrogenase	K03778	2	2	2	0	1	1	0	1	1	1
Phosphoketolase (heterolactic fermentation)	HK	Hexokinase	EC:2.7.1.1	1	0	0	0	0	0	0	0	0	0
Phosphoketolase (heterolactic fermentation)	HK	Hexokinase	K00844	1	0	0	0	0	0	0	0	0	0
Phosphoketolase (heterolactic fermentation)	HK	Hexokinase	EC:2.7.1.2	0	1	2	0	1	0	1	0	1	2
Phosphoketolase (heterolactic fermentation)	HK	Hexokinase glucose ATP phosphotransferase	Pathway tools hole filler	0	0	0	1	0	0	0	0	0	0
Phosphoketolase (heterolactic fermentation)	G6PD	glucose-6-phosphate dehydrogenase	EC:1.1.1.49	0	0	0	1	1	1	1	0	0	0
Phosphoketolase (heterolactic fermentation)	G6PD	glucose-6-phosphate dehydrogenase	EC:1.1.1.363	0	0	0	1	1	1	1	0	0	0
Phosphoketolase (heterolactic fermentation)	PGL	6-phosphogluconolactonase	EC:3.1.1.31	1	0	0	1	1	1	1	0	0	0
Phosphoketolase (heterolactic fermentation)	PGD	phosphogluconate dehydrogenase [NAD(P)+-dependent, decarboxylating]	EC:1.1.1.351	0	0	0	0	0	0	0	0	0	0
Phosphoketolase (heterolactic fermentation)	PGD	phosphogluconate dehydrogenase [NAD(P)+-dependent, decarboxylating]	EC:1.1.1.43	0	0	0	0	0	0	0	0	0	0
Phosphoketolase (heterolactic fermentation)	PGD	phosphogluconate dehydrogenase [NAD(P)+-dependent, decarboxylating]	EC:1.1.1.44	1	1	1	3	2	1	1	0	0	0
Phosphoketolase (heterolactic fermentation)	R5PE	ribulose-phosphate 3-epimerase	EC:5.1.3.1	1	2	2	1	1	0	1	1	2	1
Phosphoketolase (heterolactic fermentation)	PKT	phosphoketolase	EC:4.1.2.9	0	1	0	1	1	1	0	0	0	0
Phosphoketolase (heterolactic fermentation)	GAPDH	glyceraldehyde 3-phosphate dehydrogenase	EC:1.2.1.12	1	1	2	1	1	1	2	1	1	1
Phosphoketolase (heterolactic fermentation)	PGK	phosphoglycerate kinase	Pathway tools hole filler	0	0	0	0	0	0	0	1	0	0
Phosphoketolase (heterolactic fermentation)	PGK	phosphoglycerate kinase	EC:2.7.2.3	1	1	1	1	1	1	1	0	1	1
Phosphoketolase (heterolactic fermentation)	PGM	2,3-bisphosphoglycerate-dependent phosphoglycerate mutase	EC:5.4.2.11	2	1	0	3	3	2	1	0	0	0
Phosphoketolase (heterolactic fermentation)	PGM	phosphoglycerate mutase / cofactor independent phosphoglycerate mutase	EC:5.4.2.12	1	0	0	2	2	2	2	2	2	2
Phosphoketolase (heterolactic fermentation)	ENO	enolase	EC:4.2.1.11	2	1	1	2	2	1	2	1	1	1
Phosphoketolase (heterolactic fermentation)	PYK	pyruvate kinase	EC:2.7.1.40	0	1	1	1	1	1	1	2	1	1
Phosphoketolase (heterolactic fermentation)	PTA	phosphate acetyltransferase	EC:2.3.1.8	1	1	3	1	1	1	1	1	1	1
Phosphoketolase (heterolactic fermentation)	LDH	L-lactate dehydrogenase	EC:1.1.1.27	0	3	1	1	1	0	0	3	1	1
Phosphoketolase (heterolactic fermentation)	LDH	L-lactate dehydrogenase	K00016	0	3	1	1	1	0	0	3	1	1
Phosphoketolase (heterolactic fermentation)	DLDH	D-lactate dehydrogenase	EC:1.1.1.28	2	2	2	0	1	1	0	1	1	1
Phosphoketolase (heterolactic fermentation)	DLDH	D-lactate dehydrogenase	K03778	2	2	2	0	1	1	0	1	1	1
Phosphoketolase (heterolactic fermentation)	ADA	acetaldehyde dehydrogenase	EC:1.2.1.10	1	1	1	1	1	1	0	1	0	0
Phosphoketolase (heterolactic fermentation)	ADH	alcohol dehydrogenase / aldehyde reductase	EC:1.1.1.1	1	1	1	3	2	2	2	3	0	1
Succinic acid production	PEPCK	phosphoenolpyruvate carboxykinase	EC:4.1.1.32	1	0	0	0	0	0	1	0	0	0
Succinic acid production	PEPCK	phosphoenolpyruvate carboxykinase	EC:4.1.1.49	0	1	1	0	0	0	0	1	0	1
Succinic acid production	PEPCK	phosphoenolpyruvate carboxykinase	K01596	1	0	0	0	0	0	1	0	0	0
Succinic acid production	PEPCK	phosphoenolpyruvate carboxykinase	K01610	0	1	1	0	0	0	0	1	0	1
Succinic acid production	MD	malate dehydrogenase	EC:1.1.1.37	0	0	0	0	0	0	2	0	0	0
Succinic acid production	MD	malate dehydrogenase	EC:1.1.5.4	0	0	0	0	0	0	0	0	0	0
Succinic acid production	MD	malate dehydrogenase	K00025	0	0	0	0	0	0	0	0	0	0
Succinic acid production	MD	malate dehydrogenase	K00116	0	0	0	0	0	0	0	0	0	0
Succinic acid production	FH	fumarate hydratase, class I (fumarase)	EC:4.2.1.2	1	1	0	0	0	0	2	1	2	2
Succinic acid production	FH	fumarate hydratase, class I	K01676	0	0	0	0	0	0	1	0	0	0
Succinic acid production	FR	fumarate reductase flavoprotein subunit	EC:1.3.5.4	0	0	1	2	2	2	5	1	0	4
Succinic acid production	FR	fumarate reductase flavoprotein subunit	K00244	0	0	1	0	0	0	1	1	0	2
Succinic acid production	ME	Malic enzyme	EC:1.1.1.38	0	1	0	0	1	0	0	2	1	1
Succinic acid production	PEPC	phosphoenolpyruvate carboxylase	EC:4.1.1.31	0	1	1	1	1	1	0	0	0	0
Succinic acid production	PYC	Pyruvate carboxylase	EC:6.4.1.1	1	0	0	0	0	0	0	3	1	0
Lactic acid metabolism	LacT	Lactate permease	K03303	0	0	0	0	0	0	0	0	1	0
Lactic acid metabolism	LacT	L-lactate permease	K00427	0	0	0	0	0	0	0	0	0	0
Lactic acid metabolism	LacT	Lactate permease	Transporter database - Table S2C (tBLASTn)	0	0	0	0	0	0	0	0	1	0
Lactic acid metabolism	ecLDH	Lactate dehydrogenase (NAD+,ferredoxin); electron confurcating LDH/Etf complex	EC:1.3.1.110	0	0	0	0	0	0	0	0	0	0
Lactic acid metabolism	ecLDH	Lactate dehydrogenase (NAD+,ferredoxin); electron confurcating LDH/Etf complex	A. woodii lctD - Table S2D (tBLASTn)	0	0	0	1	1	0	0	3	4	0
Lactic acid metabolism	EtfA	electron tansfer flavoprotein A	K03522 (enzymatic function further delineated by phylogenetic analysis - Figure 7)	0	0	0	0	0	0	0	0	3	0
Lactic acid metabolism	EtfB	electron tansfer flavoprotein B	K03521 (enzymatic function further delineated by phylogenetic analysis - Figure 7)	0	0	0	0	0	0	0	0	3	0
Reverse beta oxidation	ACAT	acetyl-CoA acetyltransferase	EC:2.3.1.9	0	0	1	1	1	0	0	2	2	1
Reverse beta oxidation	ACAT	acetyl-CoA acetyltransferase	EC:2.3.1.16	0	0	0	0	0	0	0	0	0	0
Reverse beta oxidation	HAD	3-hydroxybutyryl-CoA dehydrogenase	EC:1.1.1.36	0	0	0	0	0	0	0	0	0	0
Reverse beta oxidation	HAD	3-hydroxyacyl-CoA dehydrogenase	EC:1.1.1.35	0	0	0	0	0	0	0	0	0	0
Reverse beta oxidation	HAD	3-hydroxyacyl-CoA dehydrogenase	EC:1.1.1.157	0	1	2	1	1	0	0	2	2	1
Reverse beta oxidation	ECoAH	enoyl-coa hydratase	EC:4.2.1.17	1	0	0	0	0	0	0	1	2	1
Reverse beta oxidation	ECoAH	enoyl-coa hydratase	EC:4.2.1.55	0	0	0	0	0	0	0	0	2	0
Reverse beta oxidation	ACD	butanoyl-CoA dehydrogenase complex (NAD+, ferredoxin)	EC:1.3.1.109	0	0	0	0	0	0	0	0	0	0
Reverse beta oxidation	ACD	acyl-coa dehydrogenase	EC:1.3.99.2	0	0	0	0	0	0	0	0	0	0
Reverse beta oxidation	ACD	acyl-coa dehydrogenase (short chain)	EC:1.3.8.1	0	0	0	0	0	0	0	0	4	1
Reverse beta oxidation	ACD	butyryl-CoA dehydrogenase	K00248	0	0	0	0	0	0	0	0	4	1
Reverse beta oxidation	ACD	acyl-coa dehydrogenase (medium chain)	EC:1.3.8.7	0	0	0	0	0	0	0	0	0	0
Reverse beta oxidation	ACD	acyl-coa dehydrogenase	K06445	0	0	0	0	0	0	0	0	0	0
Reverse beta oxidation	ACD	acyl-coa dehydrogenase	"acyl-CoA dehydrogenase" (gene product name from JGI annotation files)	0	0	0	0	0	0	3	3	1	0
Reverse beta oxidation	EtfA	electron tansfer flavoprotein A	K03522 (enzymatic function further delineated by phylogenetic analysis - Figure 7)	0	0	0	0	0	0	0	1	2	1
Reverse beta oxidation	EtfB	electron tansfer flavoprotein B	K03521 (enzymatic function further delineated by phylogenetic analysis - Figure 7)	0	0	0	0	0	0	0	1	2	1
Reverse beta oxidation	CoAT	butanoyl-CoA:acetate CoA-transferase	EC:2.8.3.12	0	0	0	0	0	0	0	2	0	0
Reverse beta oxidation	CoAT	butanoyl-CoA:acetate CoA-transferase	EC:2.8.3.8	0	0	0	0	0	0	0	0	0	0
Reverse beta oxidation	CoAT	4-hydroxybutyrate CoA transferace	EC:2.8.3.-	0	0	0	0	0	0	0	0	3	0
Reverse beta oxidation	CoAT	butyryl-Coa:acetate CoA-transferase	"butyryl-Coa:acetate CoA-transferase" (gene product name from JGI annotation files)	0	0	0	0	0	0	0	1	0	1
Alternative fates of acyl-CoA species	TE	Thioesterase (acyl-coa hydrolase)	EC:3.1.2.20	0	0	0	0	0	0	0	0	0	0
Alternative fates of acyl-CoA species	PBT	Phosphate butyryltransferase	EC:2.3.1.19	0	0	0	0	0	0	0	0	0	0
Alternative fates of acyl-CoA species	BCK	Butyrate kinase	EC:2.7.2.7	0	0	2	0	0	0	0	1	0	0
Ferredoxin oxidation	Rnf_A-G	ferredoxin NAD+ oxidoreductase Na+ translocating -Rnf complex	EC:1.18.1.8	0	0	0	0	0	0	0	0	0	0
Ferredoxin oxidation	Rnf_A-G	ferredoxin NAD+ oxidoreductase Na+ translocating -Rnf complex	EC:7.2.1.2	0	0	0	0	0	0	0	0	0	0
Ferredoxin oxidation	RNF	electron transport complex protein RnfA	K03617	1	0	0	0	0	0	0	1	1	1
Ferredoxin oxidation	RNF	electron transport complex protein RnfB	K03616	0	0	0	0	0	0	0	0	0	0
Ferredoxin oxidation	RNF	electron transport complex protein RnfB	COG2878	1	0	0	0	0	0	0	1	1	1
Ferredoxin oxidation	RNF	electron transport complex protein RnfC	K03615	1	0	0	0	0	0	0	1	1	2
Ferredoxin oxidation	RNF	electron transport complex protein RnfD	K03614	1	0	0	0	0	0	0	1	1	0
Ferredoxin oxidation	RNF	electron transport complex protein RnfE	K03613	1	0	0	0	0	0	0	1	1	1
Ferredoxin oxidation	RNF	electron transport complex protein RnfG	K03612	1	0	0	0	0	0	0	1	1	1
Ferredoxin oxidation	Hyd1	ferredoxin hydrogenase	EC:1.12.7.2	0	0	0	0	0	0	0	0	0	1
Ferredoxin oxidation	Hyd1	ferredoxin hydrogenase	"FeFe hydrogenase (group B1/B3)" (gene product name from JGI annotation files)	1	1	1	0	0	0	0	1	1	1
Ferredoxin oxidation	HydABC	bifurcating [Fe-Fe] hydrogenase	EC:1.12.1.4	0	0	0	0	0	0	0	0	0	0
Ferredoxin oxidation	ECH	energy-conserving hydrogenase subunit A	K14086	0	0	0	0	0	0	0	0	0	0
Ferredoxin oxidation	ECH	energy-conserving hydrogenase subunit B	K14087	0	0	0	0	0	0	0	0	0	0
Ferredoxin oxidation	ECH	energy-conserving hydrogenase subunit C	K14088	0	0	0	0	0	0	0	0	0	0
Ferredoxin oxidation	ECH	energy-conserving hydrogenase subunit D	K14089	0	0	0	0	0	0	0	0	0	0
Ferredoxin oxidation	ECH	energy-conserving hydrogenase subunit E	K14090	0	0	0	0	0	0	0	0	0	0
Ferredoxin oxidation	ECH	energy-conserving hydrogenase subunit F	K14091	0	0	0	0	0	0	0	0	0	0

## Sheet: Table S4
Table S4. Amino acid sequences for EtfBs used in phylogenetic tree generation of Figure 4.
Descriptions of the sources of these genes can be found in Table S9.
>Acetobacterium_woodii_awo_0871
MKILVCIKQVPGTSNVEVDPETGVLIRDGVESKLNPYDLFGLETAFRLKEQLGGTITTLSMGPMQSK
EVLMESFYMGADEGCLLSDRKFGGADVVATSYTLAQGTKRLGDFDLIICGKQTTDGDTAQVGPEMAEFLGIPHVTNVIKILAADEKGLTL
QMNMEESLEIQRVPYPCLITVDKDIYTPRLPSYKRKLDISKNPEIKILTLKDMYDTNEKKYGLSGSPTQVERIFPPESNVEKTSFEGDGK
VLAKALLGILTEKKYLG
>Acetobacterium_woodii_awo_1573
MRILVCAKQVPDTNEVKIDPKTGTMIREGVPSILNPDDANALEAALVIKDENPGTEVIVMTMGPPQA
SEMLRECLAMGADEAYLLSDRAFGGADTWATSATLAAGIKKVKKVDLVLAGRQAIDGDTAQVGSQIAQRLKMPVVTYVEDIKIEDKKAIV
HRQMEDGYEVIEVQLPCLLTCVKELNDPRYMSVGGIMDAYEQPITIWNHEDIGLSPEACGLNASPTQVFRSFSPPAKGGGEMITGTTVNE
VAGSLVSKLKEKHII
>Clostridium_kluyveri_CKL_0456
MKIVVCLKQVPDTTEVKIDPKTGTLIREGVPSIINPDDKNALEESIALKEKVGGTVTVVSMGPPQAV
DALREALAMGADEAILVSDRAFAGADTQATSYALAGALKNLEYDLIFAGRQAIDGDTAQVGPQIAEKLGIPQITYVEKVDVDGDTLTVQR
AWEDGYEVAKIKTPCMLTAIKELNQPRYMNMKNIFEVFKKEVKIWSADDLDVDKNKLGLNGSCTKVKRSHTKEAKGAGEIVNKPIKEAVA
YSISKLREKHVI
>Acidaminococcus_fermentans_Acfer_0555
MNIVVCVKQVPDTAEMKIDPVTNNLVRDGVTNIMNPYDQYALETALQLKDELGAHVTVITMGPPHAE
SVLRDCLAVGADEAKLVSDRAFGGADTLATSAAMANTIKHFGVPDLILCGRQAIDGDTAQVGPEIAEHLGLPQVTAALKVQVKDDTVVVD
RDNEQMSMTFTMKMPCVVTVMRSKDLRFASIRGKMKARKAEIPVYTAAALEIPLDIIGKAGSPTQVMKSFTPKVTQVHGEIFDDEDPAVA
VDKLVNKLIEDKIITK
>Acidaminococcus_fermentans_Acfer_0985
MNIAVLLKQVPAVSDIQLAADNNLVRVGAPSMLNPVDLHALEAALALKDQEGGTVTLVTMGTALASD
ILREGIAMGADKGILLSDERMAGSDTLATGRILAAALGKLGPFDLVLTGKRSTDGDTGQIPPALAQRLGMTLLSYADELEVKEGKATIRR
LNRGGVETLQAALPAVISVTEKCGNPRTPGIRGKMAAKKAVFPVWRLEDIELEPEKAGKAGSATAVTELFAPEPHPVGTMIQGATPAEAA
ANLVNELRKKNLL
>Clostridium_kluyveri_CKL_3517
MDIIVLVKQVPDMEKVKFDREKGVVDRTSASAEINPFDLNALETAVQIAENIDARVTAVSMGPPNTESALKECIARG
AHEGVLVSDRKFGGSDTKATSKILASAIKKLGAYDLVIAGEKTVDGDTGQVGPEVAEFLNIPHASYVSKITEMNKDSMEVHSEIWEGTYL
KSIKFPCLITVTKDINHPRLPSFKNKMKARKAEIKILKLEDLEEFLNEDNVGFKGSPTKVKKIEIPQIEKRQGKIYRESDTVEAENELIN
IFKKIKVLEV
>Paracoccus_denitrificans_RS12675
MKVLVPVKRVIDYNVKARVKSDGSGVDLANVKMSMNPFDEIAVEEAIRLKEKGQAEEIIAVSIGVKQAAE
TLRTALAMGADRAILVVAADDVQQDIEPLAVAKILAAVARAEGTELIIAGKQAIDNDMNATGQMLAAILG
WAQATFASKVEIEGAKAKVTREVDGGLQTIAVSLPAVVTADLRLNEPRYASLPNIMKAKKKPLDEKTAAD
YGVDVAPRLEVVSVREPEGRKAGIKVGSVDELVGKLKEAGVI
>Ruminococcaceae_bacterium_CPB6_B6259_01785
MNILVCVKQVPDTTEIKIDPKTNTLIRDGVPSIVNPFDGYALEAAARIKDKNPDTKIVVMSMGPSQA
EAALRDCLAIAADKAYLVSDRAFGGSDTLATSYILSSAVKKIEELEGKFDAVFCGKQAIDGDTAQVGPELAEHLGYPQVTYGLEVSLEDD
SLHVLREAEDGTEIIGVKLPCVVTFTKPSFDPRFPTIKRKMAARRAKIEQLSAADLTTIDLTRAGLKGSPTKVKKSFVPPRKEAGVVIKE
ATPEDSAHKLFQTLNDAHVI
>Clostridium_butyricum_ATN24_RS08880
MNILLCVKQVPDDSVEIHLADSEKKPNLNGVSLVANAFDTYALEMAVRFIEANEGAVSVLTVGAEDC
LNTLKNCLSVGAKEAFFVKDDLYSDLDAMGAAQALADAIHKIEKDKGEKFDLILCGKESTDEITGQVGAILSEKLEVGFVSSAVEIDLKD
DNIEVHQETEEGYNLVSMKSPAVITVSKPNYDPRYPTIKSKMKSRKAVIPTYSAEEIGEVKKSKVHCIKYVEPPKKEAGIKIQEKDVNVA
ISAAMDQMKKDKVI
>Clostridium_butyricum_ATN24_RS03160
MNIVVCVKQVPDTTAVKIDPKTGTLIRDGVPSIINPEDKHALEGALRIKEATGAKVTVVSMGLPMAK
AALREALCMGADEAILLTDRALGGADTLATSKALSGVIAKLDADIVFAGRQAIDGDTAQVGPEIAEHLDIPQVTYVQDVKVEGETLIVNR
ALEDGHQVVEVKTPCLLTAIEELNSPRYMNVARIFETNDDEIKVMGAADIDVPVEELGLKGSPTKVKKSMTKEVKGQGELVKQEPKDAVT
YVLGKLKEKHYI
>Clostridium_butyricum_ATN24_RS03025
MNILVCIKQVPGTSKVEVDPVTGVLKRDGIDSKMNPYDLYALETALRIREEKGGTIKVLSMGPPQAL
SVIKEAYSMGVDDGVLLSDRKFGGADVLATSYTLSQGVRKMGDFDLIICGKQTTDGDTAQVGAEIAEYLGIPHAANIEKIYSIDEESITV
DMDMPETTEKIKIQYPCLITVDKGIFEPRLPSYKKKLTTKDREIKILSLNDFNDKEENNYGLNGSATQVERIFPPTVNTDREMWTGKSEE
LTDKILNKLKEVKFI
>Agathobacter_rectalis_EUR_03540
MNIVVCIKQVPDTKGGVKFNPDGTLDRASMLAIMNPDDKAGLEAALRIKDETGAKVTVLTMGLPKAD
AILREAMAMGADDAVLVTDRVLGGADTWATSTTIAGALRNLDYDLIITGRQAIDGDTAQVGPQIAVHLGLPVISYAEDIKVEGDSVVVKR
QYEDRYHVVKAKMPCLITALSELNEPRYMTPGGIFDAFDKEVTVWGRADLKDVDDSDLGLKGSPTKIAKASDKVPKGAGEKVNLDPTESV
NYLMEKFKEKHII
>Fusobacterium_prausnitzii_FAEPRAA2165_01582
MKAIVCVKQVPDTSGKVAVKADGTLDRASMATITNPDDLNALEAALKLKDATGCEVVVITMGPPPAE
GMLRELLARGADKAVLVSGREFGGSDTFATSQILAAAVNKIGVGPEDVVFCGRQAIDGDTAQVGPQIAEKLHLPQVTYVADIQKDGNTLT
VKRMLEDGYMMVKVQTPCLLTCIKELNQPRYMSVNGIFTCYDKPMEVFDYNALKDDPLIEVDTIGLKGSPTNVFKSFTPPQKGAGTMLTG
DDTAAQLAGILAKKHLI
>Candidatus_Weimeria_bifida_FRC54_10775
MKIVVCIKQVPDTKGGVVFNPDGTLNRAAMLTIMNPDDKAGLEAALRIKEAHPGTTVTVLTMGLPKA
EDVLLEAMAMGADDGVLVTDRVLGGADTWATSTTIAGALRNIDYDLIITGRQAIDGDTAQVGPQIAEHLGIPVISYAEDIKVDEAAKTVE
VKRQYDDRYHILKANMPCLVTALAELSKEPMYMTPGGIFDAVDQKADRITVWGRKDLKDVDDKDLGLKGSPTKIAKASDKVRKGAGEKVS
LDPQASVEYIMGKLNEKHLI
>Candidatus_Pseudoramibacter_fermentans_FRC53_01755
MKIAICVKYVPVDSKVQVDPATHALIRNSGAGEINPSDRYAVEMARRLKKDGDTLDVFTMGPADAVR
ALKVVLALGADHAYLLNDKAFAGSDTLGTAKVLAAALTQYGPYDVVLMGSASNDGATGQVGPMTAELLGMPDVTDAVDLQIDGGQAAVSK
KAGDSLFALKTALPVLVTVPFGANEPELPTLRNQVAANQHDIIDVTAADLGIAPETVGQAGALSIVTDTMQVVQKKQAVTVTGTVDEMAN
KLAGLVEGQLKALQQGGGEHV
>Candidatus_Pseudoramibacter_fermentans_FRC53_01660
MNFLVCVKQVPDTTEIRIDPETNTLIRKGVPSIVNPFDGYALEMAARIKDARDDVKIVVVSMGPDQA
KEALKNCLAVGGDEAYLVSGRKFGGSDTLATSYVLACAIKKIEEIEGKFDVIFCGKQAIDGDTAQVGPELAEHLGIPQITYGLTAEMTDD
EIQVTRETEDGQEILGASFPCLVTATKPSFDPRLPKIKDKLAARKKEIHVLGEEDFDIDFTKCGLKGSPTNVKKTFVPPVKTGGEMITGE
TPEEVAANLAAALDKEGLL
>Clostridium_tyrobutyricum_J418_RS0107525
MDILVCIKQVPGTSKVEVDPVTGVLKRDGIDSKMNPYDLFALETAFRIRAEKGGTIKVISMGPPQAA
DVIKEAYMMGADEGTLLSDRKFAGADVLATSYTISQGIRKMGHVDLILCGKQTTDGDTAQVGPEMAEYLGMPHIANVLSIEEVKDKSIVV
KMDMPNTVEIADVKFPCLLTVEKDIYQPRLPSYKKKLETKDRKVGMLALKDFEDKDENKYGLNGSPTQVERIFPPEVNTDQEKWEGTGEE
LADRLESKLKELKFV
>Clostridium_tyrobutyricum_J418_RS0108715
MKILLCVKQVPDDSVEIHLDNKTKKPNLNGVSLVANAFDTYALELAVRFMEAHGGNVSVLTVGADDS
LNTLKNCLAVGAKEAFFVKDDSYANLDAISAAGVLADAIHKIEKDKGEKFDLILCGKESTDEITGQVGPMLAEKLGTGFVSSAIEIDLKD
NGIAVNQEIEEGYNVVSLDTPAVVTVSKPDYDPRYPTIKNKMKSRRAVIPTYSASEIGEVKQAKVRCIEYVAPPKKEAGIKIQEKDAALA
VSAAMEQMKKDKAI
>Clostridium_tyrobutyricum_J418_RS0108780
MNIVVCLKQVPDTNEVKIDPKTGTLIREGVPSIINPDDKNALEESLVMRDKVGGKVTVISMGPPQAE
SALRESLAMGADEAILISDRAFAGADTCATAYALSGALKKLDYDVIFAGRQAIDGDTAQVGPEIAEFLSIPQITYVEKIDVNGNILTVKK
AWEDGYETVKVNTPVLLTAIKELNEPRYMGMKNIFETFKKEVKVWNADDLEVDKERLGLKGSPTKVKRSATKEARGAGEVINKPVKEAVT
YAISKLKEKHVI
>Pseudoramibacter_alactolyticus_bin1_IZT75_03270
MNILVCVKQVPDTTEIRIDPETNRLIRDGVPSIVNPFDGYALEMAARIKDERDDVKIVVVSMGPEQA
KEALKNCLAVGGDAAYLISGRKFGGSDTLATSYILSRGIAKIEETEGKFDAIFCGKQAIDGDTAQVGPELAEHLGLPQVTYGLTAEIVDD
EIQITRETEDGQEILAMDFPCLVTATKPNFDPRLPKIKDKLAARKKEITVLSEDDLDCDFSLCGLGGSPTKVKKTFVPPVKQGGMKIEAE
TGEEAAQKLAELLDKDNVL
>LCO1_LKE32_1332
MNIVVCIKQVPDTKGGVKFNPDGTLDRASMLAIMNPDDKAGLEAALRIKDETGAKVTVLTMGLPKAD
AILREAMAMGADDAVLVTDRVLGGADTWATSTTIAGALRNLDYDLIITGRQAIDGDTAQVGPQIAVHLGLPVISYAEDIKVEGDSVVVKR
QYEDRYHVVKAKMPCLITALSELNEPRYMTPGGIFDAFDKEVTVWGRADLKDVDDSDLGLKGSPTKIAKASDKVPKGAGEKVNLDPTESV
NYLMEKFKEKHII
>ACID1_LKE33_1737
MNIIVCVKQVPDTAEMRIDPVTNNLVRDGVTNIMNPYDQYALETALELKDSLGAHVTVLTMGPPQAE
VVSKDCLAVGADEAKLITDRAFGGADTLATSAALANSIKALGIPDLILCGRQAIDGDTAQVGPEIAEHLDLPQVTGALKVQVKGDEVIVD
RDNENTSQTLSMKMPCVVTVMRSPDLRFASIRGKLKARKTEVPHLSADDLHIDHDIIGKAGSPTQVMRSFTPKVVQVHGEIFTDEDPQVA
VDKLVAKLIEDKIITK
>CLOS1_LKE46_3875
MDPKTNTLDRSSAPTIFNPYDAHALEEAVRIKRKFGGRISVISMGPPQAQEVIKKSIEMGADEGYLL
SDRAFAGSDTLATSYILAMGIKKIMENENINIIFCGKQAIDGDTAQVGPGIASRLGITQLTYVEKIQSLDLKESTVTVHRKIDSGYEVVQ
SKLPCLITVEKSINELSFSPLPNMIRAARYRAKIWGINDFNADLNQLGLKGSPTSVRRIFPPAQRSGGELLHGSTDEVVKILVDKLKGGI
IKCQS
>CLOS1_LKE46_4486
MNIVVCLKQVPDTNEVKIDPKTGTLIREGVPSIINPDDKNALEESIAIKEKTGGKVTVISMGPPQAE
SALREALAMGADEAILISDRAFAGADTCATAYALSGALRKLDYDIIFAGRQAIDGDTAQVGPEIAEFLGIPQITYVEKVDVDGSTVTVRK
AWEDGYETVKVNTPVLLTAIKELNNPRYMHMKNIFKIFNKEVKVWSAADLEVDRERLGLKGSPTKVKRSATKEARGAGEIVNKPVKEAAA
YAISKLREKHVI
>CLOS1_LKE46_5193
MDILVCIKQVPGTSKVEVDPVTGVLKRDGIDSKMNPYDLFALETALRIKEKQGGTIKVISMGPPQAT
EVIKEAYMMGADEGVLLSDRKFAGADVLATSYTISQGIKKMGHIDLILCGKQTTDGDTAQVGPEMAEYLGIPHIANVISIEDIKDNSVVV
KMDMPNTIEIADIKFPCLLTVDKDIFQPRLPSYRKKLATKDREVGVLSLKDFEDKDENKYGLNGSPTQVEKIFPPEVNTDKEMWNGTNEE
LADKLTEKLKELKFV
>CLOS1_LKE46_5614
MQILLCVKQVPDDSVEIHLDSKTKKPNLNGVSLAANAFDTYALELAVRFVEANGGSVSVLNVGAEDS
LNTLKNCIAVGAKEAFFVKDDSYADLDAAVTADALADAIHKIEKDKGEKFDLILCGKESTDEITGQVGPLLAEKLGTGFVGSAIEIDLKD
DGIDVHQEIEEGYNVVSLKIPAVLTVSKPDYDPRYPTIKNKMASRKAVIPTYSAAEIGEVKQAKVHYVEYVDPPKKEAGIKIQEKDAALA
VSTAIEQMKKDKAI
>CLOS1_LKE46_6158
MNIVVLIKQVPDMERVKFDREKGVVDRKSAGTEINPFDLNALEAAVQISEKIDAKVTAISMGPPNAE
QALKECIARGADEGILVSDAKFGGSDTKATSFILASAIKKIGNCSLIIAGEKTVDGDTGQIGPEVAEFLDVPHASYISKITDVGEGSIKV
CSEIWEGTYLKNIKLPGLITVTKDINQPRLPSFKDKMKARKAEIKVIKFEDLKEYLDNDTVGFKGSPTKVKKIEVPQIEKRQGKIYRQQD
SERAEEELISLFMKKKILEVEV
>CLOS1_LKE46_7364
MNIVVCLKQVPDTNEVKIDPKTGTLIREGVPSIINPDDKNALEESIAIKEKTGGKVTVISMGPPQAE
SALREALAMGADEAILISDRAFAGADTCATAYALSGALRKLDYDIIFAGRQAIDGDTAQVGPEIAEFLGIPQITYVEKVDVDGSTVTVRK
AWEDGYETVKVNTPVLLTAIKELNNPRYMHMKNIFKIFNKEVKVWSAADLEVDRERLGLKGSPTKVKRSATKEARGAGEIVNKPVKEAAA
YAISKLKEKHVI

## Sheet: Table S5
Table S4. Extracellular concentrations of carbohydrates and fermentation products during bioreactor operation.
mM indicates units of millimolar. gCOD/L indicates units of grams of chemical oxygen demand per liter.
"UFMP feed" represents the ultra filtered milk permeate feed and indicates the average value of 5 batches of feed sampled throughout the reactor operation period.
Sample	Day	Reactor	Lactose_mM	Glucose_mM	Galactose_mM	Ethanol_mM	Lactic_acid_mM	Succinic_acid_mM	Formic_acid_mM	Acetic_acid_mM	Butyric_acid_mM	Hexanoic_acid_mM	Octanoic_acid_mM	Propanoic_acid_mM	Heptanoic_acid_mM	Pentanoic_acid_mM	Total_gCOD/L	Soluble_gCOD/L	Volatile_suspended_solids_g/L
UFMP feed	NA	Feed	130.305	0.012703	0.220927	7.09859	4.24609	3.08247	1.38702	6.13246	0	0	0	0	0	0	51.7802	50.8166
Day 0	0	CSTR	51.1092	3.25707	0.926535	5.6475	3.44026	0.620279	0.0783637	21.0438	0	0	0	25.2875	0	4.8425	46.4315	25.7601	24.6667
Day 6	6	CSTR	0	0	0	0	0.378575	0.086785	0.512415	165.204	23.46	4.23	0.035	44.245	0.815	10.74	41.2544	30.3414	15.4333
Day 12	12	CSTR	0	0	0	0	0.166995	0.128785	1.60214	209.023	32.8	7.27	0.175	30.52	0.745	8.32	41.6041	32.8147	9.28333
Day 18	18	CSTR	0	0	0	0	0.718335	0.14801	1.97049	205.131	27.7	10.44	0.355	19.51	0.835	5.855	38.4471	31.8461	5.9
Day 24	24	CSTR	0	0	0	0	0.053625	0.037645	0.26973	147.584	36.875	10.445	0.17	12.585	0.43	4.23	40.1691	32.0972	5.575
Day 30	30	CSTR	0	0	0	0	0.282305	0.19252	2.36723	76.1487	70.31	20.375	0.435	9.22	0.315	3.31	44.4383	38.6982	6.01111
Day 36	36	CSTR	0	0	0	0.715	0.59186	0.227555	1.93995	115.966	83.98	22.585	0.35	0	0.2	3.42	44.9046	38.0525	4.325
Day 44	44	CSTR	0	0	0	57.76	25.7182	0.30947	2.68607	131.971	45.985	27.25	0.82	7.11	0.3	5.41	45.084	42.1064	1.76111
Day 49	49	CSTR	0	0	0	103.46	40.8213	3.09232	13.965	109.386	17.15	40.795	5.675	0	1.595	3.405	48.9944	43.7208	2.10833
Day 54	54	CSTR	0	0	0	169.92	36.4385	6.15235	6.08239	117.423	0	25.785	10.38	0	1.81	1.025	47.3083	44.5818	2.13333
Day 60	60	CSTR	0	0	0	111.83	154.625	6.03454	9.55375	88.7016	0	17.265	10.36	0	0.695	0.2	47.3581	41.4173	2.15
Day 66	66	CSTR	0.279365	0	0.99385	56.835	312.371	5.96386	4.38321	51.6651	0	16.065	8.625	0	0.27	0.06	47.2501	43.7577	2.17222
Day 72	72	CSTR	0	0	1.68881	36.505	241.763	5.56726	2.45126	29.8249	21.665	16.16	3.8	0	0.22	0.14	48.0422	43.5776	2.7
Day 78	78	CSTR	0	0	0.903745	41.275	232.289	6.75641	7.02381	75.1405	24.675	13.845	2.22	0	0.165	0.285	46.8181	46.458	3.08333
Day 84	84	CSTR	0	0	0.632065	22.385	166.005	10.7394	25.7708	56.0141	23.59	25.935	2.04	0	1.205	4.77	46.602	42.7495	3.53333
Day 91	91	CSTR	0	0	0.632925	8.115	93.1981	45.6247	28.9519	60.1765	60.225	14.465	0.855	32.555	0.8	8.015	46.7821	42.2094	4.2625
Day 97	97	CSTR	0	0	0	4.78	24.116	89.6635	24.4994	55.8315	126.685	8.78	0.29	20.835	0.355	4.175	46.134	41.5974	2.67778
Day 104	104	CSTR	0	0	0.947775	4.18	75.3124	96.1816	23.119	74.168	66.675	5.445	0.085	15.02	0.12	2.41	48.7555	45.2917	4.98889
Day 108	108	CSTR	1.03205	0	8.79583	4.075	141.769	52.3209	1.72254	143.34	49.625	3.685	0.03	13.19	0.065	1.34	49.8268	47.2914	4.89167
Day 114	114	CSTR	0	0	0	2.575	0	17.1282	0	146.697	192.145	1.41	0	0	0.02	0.505	51.4158	47.5057	4.03889
Day 120	120	CSTR	0	0	0	8.06	0	4.67058	0	119.214	221.215	0.745	0	0	0.01	0.225	50.8981	48.1842	4.14444
Day 126	126	CSTR	0	0	0	6.985	4.08359	5.62997	0	82.2916	196.71	0.76	0	0	0	0.08	51.9693	48.1127	8.36667
Day 132	132	CSTR	12.9865	0	10.3478	0	64.4133	5.08407	18.1463	92.304	102.685	0.71	0	0	0	0.05	50.9338	48.3984	4.79167
Day 139	139	CSTR	0	0	0	3.88	9.15724	1.14719	3.1399	182.791	171.195	0.215	0	0	0	0.05	47.8271	45.5417	4.41111
Day 146	146	CSTR	0	0	0	3.54	0.75112	4.34394	4.68015	223.435	167.58	0.15	0	0	0	0.035	46.6292	44.1192	3.83889
Day 149	149	CSTR	0	0	0	2.5	1.46006	4.30718	3.34963	214.859	168.15	0.155	0	0	0	0.04	46.7368	44.0117	3.83333
Day 156	156	CSTR	1.14989	0	0	2.12	22.2075	5.57932	5.25171	239.824	142.785	0.545	0	0	0	0.065	48.9241	44.9081	3.95
Day 162	162	CSTR	2.52918	0	0	3.88	48.9586	6.45601	5.89262	253.042	108.015	0.695	0	0	0	0.065	49.4978	44.9798	3.8
Day 168	168	CSTR	3.58804	0	0	4.05	59.0328	7.13985	8.58868	258.259	101.14	0.65	0	0	0	0.085	48.0635	46.9161	4.25556
Day 176	176	CSTR	3.37245	0	0	4.61	71.6798	7.4779	8.11862	259.033	87.595	0.695	0	0	0	0.04	48.2787	44.6212	4.78889
Day 181	181	CSTR	0.48691	0	0	4.16	85.7302	7.95747	7.53549	254.546	87.06	0.805	0	0	0	0.025	51.0038	46.2707	6.9
Day 185	185	CSTR	0	0	0.595755	8.32	0.50743	6.50099	13.6443	186.703	167.59	0.985	0	0	0.01	0.035	47.6332	45.9838	6.1
Day 192	192	CSTR	0	0	0.474215	15.79	0	3.09515	6.41817	123.789	182.67	1.58	0	0	0.01	0.2	47.9918	45.4101	6.45
Day 199	199	CSTR	0	0	0.381575	17.27	0	3.24461	7.26097	130.664	188.97	1.79	0	0	0.04	0.505	48.5297	45.5894	6.05
Day 204	204	CSTR	0	0	0.478335	20.65	0.93851	3.04322	6.04007	129.46	170.493	5.94667	0.26	0	0.05	0.49	50.2508	47.0954	5.57778
Day 210	210	CSTR	0	0	0.379665	22.995	0.09245	2.88166	4.83256	120.087	160.023	7.14333	0.32	0	0.04	0.545	51.47	47.5974	7.175
Day 216	216	CSTR	0	0	0	23.005	0.343775	3.37893	4.28359	80.4043	177.705	8.14	0.475	0	0.03	0.51	50.6787	47.7819	6.36667
Day 224	224	CSTR	0	0	0	20.05	0.444915	4.07606	5.34291	109.393	174.205	9.61	0.375	0	0.02	0.62	50.4587	48.2586	6.38333
Day 228	228	CSTR	0	0	0	18.865	0.523535	4.1776	4.2794	136.567	160.18	8.51	0.28	0	0.025	0.685	51.1554	48.1852	4.76111
Day 234	234	CSTR	0	0	0	15.185	10.6115	3.75338	3.13278	140.661	154.06	9.205	0.19	0	0.03	0.815	51.6688	47.3785	5.95
Day 240	240	CSTR	0	0	0	13.45	2.85346	4.07932	2.6429	155.784	165.825	6.765	0.105	0	0.025	0.645	49.5787	47.9286	5.96667
Day 246	246	CSTR	0	0	0	9.985	14.5833	2.27589	17.1944	204.025	167.19	7.25	0.12	3.34	0.01	0.47	51.7421	47.0118	3.27778
Day 252	252	CSTR	0	0	0.168945	8.56	33.2076	1.76058	17.5864	235.587	147.358	5.12	0.1	2.245	0.01	0.33	48.0752	44.7017	4.1
Day 258	258	CSTR	2.9705	0	7.26429	5.335	115.22	1.08503	17.136	260.281	83.68	3.85	0.08	1.61	0	0.265	50.2183	49.2486	4.55
Day 264	264	CSTR	0.65945	0	0.560755	9.305	124.443	1.1247	17.5848	274.977	79.59	2.34	0.04	1.965	0	0.225	50.0691	48.9129	6.31667
Day 270	270	CSTR	0	0	0.262845	11.89	33.9403	1.7653	18.2162	235.816	148.8	2.21	0.03	2.23	0	0.195	50.554	48.3534	3.03333
Day 276	276	CSTR	0.83145	0	3.6154	12.895	44.645	1.54137	17.8437	225.687	137.39	1.93	0.02	2.65	0	0.33	51.188	48.8756	3.22222
Day 282	282	CSTR	5.58869	0	10.2093	12.11	61.9378	0.864745	17.4899	201.22	111.21	1.98	0.02	2.065	0	0.305	49.435	47.9059	2.82778

## Sheet: Table S6
Table S5. Relative abundance of MAGs in all samples. Relative abundance values are percentages out of 100.
The NCBI SRA accession numbers are provided as links for the raw reads of the metagenome for each sample. For PacBio samples that utilized multiple runs, the NCBI BioSample for the experiment is provided.
					Sample
					Day 000	Day 012	Day 024	Day 036	Day 044	Day 049	Day 054	Day 060	Day 066	Day 072	Day 078	Day 084	Day 097	Day 108	Day 120	Day 126	Day 146	Day 168	Day 192	Day 216
					0	12	24	36	44	49	54	60	66	72	78	84	97	108	120	126	146	168	192	216
					Sequencing platform
					Illumina NovaSeq S4	Illumina NovaSeq S4	PacBio Sequel II	Illumina NovaSeq S4	PacBio Sequel II	Illumina NovaSeq S4	Illumina NovaSeq S4	PacBio Sequel II	Illumina NovaSeq S4	Illumina NovaSeq S4	Illumina NovaSeq S4	Illumina NovaSeq S4	Illumina NovaSeq S4	Illumina NovaSeq S4	Illumina NovaSeq S4	Illumina NovaSeq S4	Illumina NovaSeq S4	Illumina NovaSeq S4	Illumina NovaSeq S4	PacBio Sequel II
					SRA accession number
					SRX12654481	SRX12654482	SAMN18243588	SRX12654483	SAMN18243037	SRX12654484	SRX12654502	SAMN18243139	SRX12654503	SRX12655142	SRX12655143	SRX12655158	SRX12655187	SRX12655904	SRX12655888	SRX12655887	SRX12655903	SRX12655961	SRX12655976	SAMN18243112
MAG ID (code used in main text)		Max relative abundance (%)	Mean relative abundance (%)		Relative abundance
Unmapped reads		90.6564	29.9131		90.6564	74.0086	56.1252	28.5621	39.3365	28.7099	24.1889	30.2912	26.6656	25.5482	26.2322	25.9216	21.8693	18.3526	13.808	10.1707	11.4114	8.91567	16.7938	20.6942
UW_MP_ATO3_1 (ATO1)		61.4704	25.4321		0	0.158527	0.0950437	1.50057	25.3508	35.1826	52.9295	61.4704	58.2957	54.8481	37.9211	50.2642	22.476	22.1553	21.239	17.2638	0.617938	0.129739	20.3703	26.3731
UW_MP_CLOS1_1 (CLOS1)		45.5744	12.1141		0	0	0	0	0	0	0	0	0	0	0	0.185552	13.9059	5.95006	24.7321	43.4234	45.5744	32.4461	35.1578	40.9075
UW_MP_ACT2_1 (ACT2)		29.598	4.3351		0	0	0	0	0	0	0	0	0	0	0.128319	4.2536	29.598	29.5868	6.60935	7.88018	1.71657	3.99954	2.58105	0.348506
UW_MP_LCO1_1 (LCO1)		18.7426	1.28023		0.0237635	1.72877	18.7426	3.82434	1.01433	0.209402	0.0433603	0	0	0	0	0.0181302	0	0	0	0	0	0	0	0
UW_MP_BIF2_1 (BIF2)		17.4471	2.31545		0	0.00842472	0.00525244	0.00444599	0	0.0155268	0.0165771	0	0.0121457	0.0387902	0.258256	0.166427	0.289363	1.71231	3.96662	4.76163	17.4471	13.15	3.83166	0.624555
UW_MP_SPH2_1 (SPH2)		16.1296	2.30195		0	2.50352	8.07393	16.1296	6.49299	7.26505	3.95819	0.688905	0.400585	0.117983	0.0607578	0.0511466	0.0486437	0.0434679	0.0171872	0.00784246	0.0358006	0.031536	0.0484732	0.0632778
UW_MP_BIF11_1 (BIF11)		15.3436	2.26779		0	0	0.00234437	0	0	0	0	0	0	0.00587399	0.156873	0.145512	0.550789	5.46168	11.7309	7.83322	2.59567	15.3436	1.36294	0.166446
UW_MP_ATO6_1 (ATO6)		13.9042	1.74138		0	0.680661	0.495319	13.9042	9.16431	2.4001	1.45869	0.202614	1.20914	1.19568	0.864242	1.18394	0.614576	0.314787	0.307488	0.247379	0	0	0.336391	0.248224
UW_MP_BIF18_1 (BIF18)		11.4399	0.94545		0	0.0118546	0	0.00795466	0	0.0137519	0.0085326	0	0.0578994	3.6745	11.4399	3.43975	0.161211	0.0459687	0.0255847	0	0	0	0	0.0221276
UW_MP_ACID1_1 (ACID1)		10.2364	0.903702		0	0	0.400921	10.2364	3.13148	3.34267	0.911296	0.0458955	0.00541344	0	0	0	0	0	0	0	0	0	0	0
UW_MP_ACT1_1		6.83206	0.937248		0	0.028627	0.0108014	0.025948	0	0.144169	0.214283	0.112096	0.655928	5.83282	6.83206	4.25161	0.500829	0.130797	0.0049932	0	0	0	0	0
UW_MP_ATO5_1		6.24935	0.413012		0	6.24935	1.05656	0.193882	0.151836	0.248257	0.188002	0	0.172339	0	0	0	0	0	0	0	0	0	0	0
UW_MP_BIF14_1		6.21838	0.727273		0	0	0.00112932	0	0	0	0	0	0	0	0.0198786	0.0165778	0.0251466	0.0552189	0.440956	0.118598	1.93343	6.21838	4.39322	1.32292
UW_MP_BIF9_1		6.2014	0.948158		0	0	0	0	0	0	0	0	0	0.00440444	1.04315	0.950537	1.67424	1.33214	1.63686	1.36135	3.78412	6.2014	0.840039	0.134925
UW_MP_BACTE5_1		5.78892	0.895828		0	0.107576	3.38217	5.78892	4.4121	3.62952	0.586722	0	0.00358517	0	0	0.00598473	0	0	0	0	0	0	0	0
UW_MP_BACTE1_1		5.67919	0.67834		0	0.111851	1.11781	1.99681	3.63595	5.67919	1.02518	0	0	0	0	0	0	0	0	0	0	0	0	0
UW_MP_ANA1_1		5.49199	0.756401		0	0	0	0	0	1.89101	5.49199	4.21282	1.27209	0.675137	0.39192	1.08093	0.0537096	0.0223839	0.00708443	0	0	0	0	0.0289392
UW_MP_BACTE2_1		4.94824	0.637754		0	0	0	0	0.0385524	0.0603263	0.0116847	0	0	0	0	1.299	0.410182	0.181392	4.94824	1.21	0.00380712	0	1.88214	2.70977
UW_MP_BIF4_1		4.79207	0.610669		0	0.0494598	0.0317611	0.0112818	0.0264061	0.278722	0.346632	0.0585126	0.117379	0.16156	0.370999	0.112955	0.0656285	0.820218	1.48964	1.17603	0.920745	4.79207	0.971874	0.411502
UW_MP_ENTER4_1		4.78664	0.467758		0.0131236	0	0	0	0	0	0	0	0.0292826	0.0138864	0.00527022	0.00451349	0.319746	4.78664	0.840793	0.306088	2.64975	0.301585	0.0292736	0.0552074
UW_MP_ATO4_1		4.60488	0.321204		0	0.114747	0.212498	4.60488	0.669931	0.550306	0.215271	0	0.0564342	0	0	0	0	0	0	0	0	0	0	0
UW_MP_BACIL8_1		4.33962	0.218727		0	4.33962	0.0349096	0	0	0	0	0	0	0	0	0	0	0	0	0	0	0	0	0
UW_MP_BIF8_1		3.77458	0.266038		0	0	0	0	0	0	0	0	0.00324445	0.00671905	0.0205289	0.0273485	0.0215961	0.0257698	0.059355	0.0158635	0.184578	0.664974	3.77458	0.516203
UW_MP_ENTER2_1		3.37881	0.322292		0.449231	0.271067	0.25386	0.161849	0.105942	0.106847	0.223945	0.113425	0.0186821	0	0	0	0	0	0	0	3.37881	0.688458	0.370836	0.302887
UW_MP_LIQLAC2_1		3.01786	0.285799		0	0	0	0	0	0	0	0	0	0.0299419	3.01786	0.464617	0.0600029	0.029019	1.28115	0.493372	0.106908	0.161714	0.0626261	0.00876773
UW_MP_BUL2_1		2.91269	0.155532		0	0	0.00321628	0	0	0	0.0108966	0	2.91269	0.117539	0.0153885	0.00457704	0.0155837	0.00774091	0	0	0	0	0	0.0230114
UW_MP_BACIL1_1		2.85196	0.180196		0	0.560453	2.85196	0.134987	0.020594	0.0278111	0.0081149	0	0	0	0	0	0	0	0	0	0	0	0	0
UW_DM_ACUT3_1		2.78949	0.377516		0	0	0	0.0254421	0	0.199319	0.133606	0.0823205	2.78949	1.57498	1.95878	0.446697	0.18685	0.0116023	0.00407521	0.0188385	0.0218782	0.00641132	0.0212375	0.0687946
UW_TS_PREV2_1		2.61298	0.134151		2.61298	0.0647298	0.00530141	0	0	0	0	0	0	0	0	0	0	0	0	0	0	0	0	0
UW_MP_SPH1_1		2.61058	0.241778		0	0	0.251485	2.61058	1.51018	0.356161	0.0946249	0	0	0	0	0	0.00414312	0.00838871	0	0	0	0	0	0
UW_MP_SCHLAC1_1		2.48769	0.249366		0	0	0	0	0	0	0	0	0	0	0	0	0	0	0.267413	0.625355	2.48769	0.941227	0.65532	0.0103126
UW_MP_ENTER1_1		2.43529	0.274978		0	0	0	0	0	0	0	0	0.230756	0.263559	0.494181	0.293187	0.949876	0	0	0	0	2.43529	0.832705	0
UW_MP_BACIL6_1		2.39721	0.177402		0	0	0	2.39721	0.600183	0.426757	0.123889	0	0	0	0	0	0	0	0	0	0	0	0	0
UW_MP_LCO2_1		2.32466	0.309147		0	0	0	0	0	0	0	0	0.0103827	0.51936	1.35489	1.34482	2.32466	0.593416	0.0288907	0.00652761	0	0	0	0
UW_DM_BACTE1_1		2.07392	0.105356		2.07392	0.0230074	0.00467799	0.00552688	0	0	0	0	0	0	0	0	0	0	0	0	0	0	0	0
UW_MP_ACID2_1		1.84381	0.181989		0.00525958	1.56491	1.84381	0.207803	0	0.0142283	0.00377407	0	0	0	0	0	0	0	0	0	0	0	0	0
UW_MP_LEUC1_1		1.79491	0.394538		0	0.018994	0.0171929	0.505175	0.412467	1.61099	1.79491	1.63334	0.429342	0.319883	0.338057	0.0518771	0.0194088	0.146892	0.237164	0.188826	0.0808428	0.0853867	0	0
UW_MP_LIQLAC1_1		1.74946	0.142601		0	0	0	0	0	0	0	0	0	0.0145605	1.74946	0.26165	0.0379174	0.0139253	0.423369	0.164617	0.0425236	0.0541217	0.0721139	0.0177698
UW_MP_OSCL3_1		1.42126	0.110475		0	0	0.519516	1.42126	0.161793	0.0786171	0.0169227	0	0	0	0	0.00220318	0.00434675	0.0048471	0	0	0	0	0	0
UW_DM_BURK1_1		1.39434	0.162235		0	0.0137186	0.082469	0.0628226	0.0908745	0.187554	0.0545542	0	0	0	0	0	0.0537909	1.39434	0.0802114	0.0313862	0.280526	0.162453	0.723987	0.026018
UW_TS_PREV1_1		1.35209	0.381542		0	0	0.00309314	0	0	0.197035	0.647302	0.183773	0.922805	0.653089	0.773888	0.638161	0.0989904	0.0695806	0.340454	0.284561	0.476583	0.212606	0.77682	1.35209
UW_MP_PREV6_1		1.30975	0.356732		0	0	0.00267242	0	0	0.172323	0.56252	0.167794	0.856013	0.608896	0.716662	0.596595	0.0915441	0.0655452	0.325756	0.269996	0.447753	0.200036	0.740789	1.30975
UW_MP_BACIL2_1		1.30962	0.238183		0	0.0352322	0.339561	1.30962	1.28237	1.09809	0.582387	0	0.00196982	0	0	0	0.0103422	0.0186912	0.0193106	0.00569423	0.0232085	0.00892095	0.0219704	0.00628216
UW_TS_ATO2_1		1.27584	0.0893732		0	1.27584	0.141035	0.0599332	0	0.0957283	0.11355	0	0.101378	0	0	0	0	0	0	0	0	0	0	0
UW_MP_BIF16_1		1.26803	0.165712		0	0.00359264	0	0	0	0.00791811	0.0110164	0	0.0103811	0.0129865	0.01544	0.00834416	0.349014	1.15365	1.26803	0.310324	0.0668292	0.0763088	0.0165026	0.00390095
UW_MP_BACTE7_1		1.18609	0.0696227		0.0481821	0.123952	1.18609	0.0305264	0	0.00370082	0	0	0	0	0	0	0	0	0	0	0	0	0	0
UW_MP_BIF5_1		1.01448	0.251026		0	0.0351679	0.0830812	0.0837121	0.104571	0.341764	0.530623	0.0676483	0.590935	1.01448	0.348375	0.0873147	0.0688227	0.574283	0.246495	0.18819	0.116466	0.452099	0.0675566	0.0189431
UW_MP_LCO5_1		0.895691	0.0547151		0.895691	0.191433	0.00717811	0	0	0	0	0	0	0	0	0	0	0	0	0	0	0	0	0
UW_MP_ATO1_1		0.880614	0.10164		0	0	0	0	0	0	0	0	0.0249678	0.122163	0.429519	0.330842	0.880614	0.127278	0.0155723	0.0071709	0.00894189	0.00759276	0.0145245	0.0636161
UW_MP_BIF6_1		0.855026	0.178919		0	0.00415864	0	0	0	0	0	0	0	0.0828652	0.855026	0.2332	0.0581192	0.661861	0.709087	0.113336	0.404696	0.299319	0.0978805	0.0588362
UW_MP_BIF1_1		0.804986	0.0788215		0.00663497	0.157976	0.0111977	0.0389911	0.124432	0.804986	0.426283	0	0.00592819	0	0	0	0	0	0	0	0	0	0	0
UW_MP_ACET1_1		0.787525	0.107136		0	0	0.00114166	0	0	0	0.00752711	0	0.00470261	0	0.0352821	0.0289683	0.155943	0.787525	0.450306	0.320282	0.118823	0.152588	0.0531778	0.026458
UW_MP_RUM1_1		0.761636	0.0385106		0	0.761636	0.00857607	0	0	0	0	0	0	0	0	0	0	0	0	0	0	0	0	0
UW_MP_LAC2_1		0.728039	0.075462		0	0	0	0	0	0	0.00287884	0	0	0	0.00337127	0.00871963	0.0135379	0.243075	0.24549	0.159497	0.728039	0.0161942	0.0723757	0.016062
UW_MP_ANA3_1		0.722218	0.0542949		0	0	0	0.0093987	0.0288511	0.722218	0.287293	0	0.0163196	0.00894746	0.00501415	0.00403899	0.00381772	0	0	0	0	0	0	0
UW_TS_ATO3_1		0.717154	0.10734		0	0.226278	0.717154	0.597728	0	0.465986	0.139647	0	0	0	0	0	0	0	0	0	0	0	0	0
UW_MP_PREV3_1		0.691187	0.110518		0	0.0452632	0.091188	0.562373	0.691187	0.66272	0.157634	0	0	0	0	0	0	0	0	0	0	0	0	0
UW_SG_COR2		0.667533	0.0961023		0	0.200283	0.667533	0.547041	0	0.408067	0.099122	0	0	0	0	0	0	0	0	0	0	0	0	0
UW_MP_ENTER5_1		0.66128	0.0729625		0.00592617	0.00494943	0.00186265	0	0	0	0	0	0.0217417	0.00583452	0	0.00588837	0.0206458	0.0311495	0.046562	0.0327391	0	0.170122	0.450549	0.66128
UW_MP_ACUT1_1		0.650669	0.13886		0	0	0	0	0	0	0.0405197	0.179052	0.603916	0.650669	0.626895	0.513213	0.0775366	0.0191856	0.00552062	0	0.0199488	0.00454504	0	0.0361921
UW_MP_STREP1_1		0.637031	0.0999814		0.0135459	0.111854	0.0140968	0.0207427	0.041259	0.219147	0.10026	0	0.046992	0.227981	0.188833	0.0356019	0.0317362	0.637031	0.216915	0.0868944	0.006737	0	0	0
UW_MP_ACID3_1		0.622929	0.0782932		0	0.622929	0.441854	0.246776	0.0958637	0.126715	0.0317265	0	0	0	0	0	0	0	0	0	0	0	0	0
UW_MP_SACCH1_1		0.527588	0.0267858		0.527588	0.00812696	0	0	0	0	0	0	0	0	0	0	0	0	0	0	0	0	0	0
UW_MP_SPOR1_1		0.49724	0.0300558		0	0	0	0	0	0	0	0	0	0	0	0	0	0	0	0	0	0.00386232	0.49724	0.100014
UW_MP_LCO4_1		0.490499	0.0840578		0	0	0	0.0155083	0.00926886	0.261982	0.420942	0.247688	0.490499	0.156278	0.0424643	0.0191721	0.00910685	0.00824812	0	0	0	0	0	0
UW_MP_BACTE6_1		0.489339	0.0775232		0	0	0.0890172	0.489339	0.314239	0.470476	0.184694	0	0.00269911	0	0	0	0	0	0	0	0	0	0	0
UW_TS_ATO1_1		0.465863	0.0267729		0	0.0525722	0	0	0	0	0.465863	0	0	0	0	0	0	0	0	0	0	0	0	0.0170222
UW_MP_BACTE8_1		0.465859	0.0236418		0	0.465859	0.00697774	0	0	0	0	0	0	0	0	0	0	0	0	0	0	0	0	0
UW_MP_MUR1_1		0.459688	0.0383006		0.459688	0.293656	0.0126668	0	0	0	0	0	0	0	0	0	0	0	0	0	0	0	0	0
UW_DM_ATO2_1		0.449126	0.0431247		0	0	0	0	0	0	0	0	0	0	0	0.0741942	0.0433334	0.035416	0.0303935	0.0293982	0.014354	0.00707617	0.179201	0.449126
UW_MP_MEG2_1		0.448683	0.0562364		0	0	0	0	0	0	0	0	0	0	0	0	0.0288157	0.0417387	0.0503235	0.0186663	0.320504	0.448683	0.124085	0.0919113
UW_MP_METH1_1		0.439849	0.0653194		0	0	0.0985136	0.36092	0.439849	0.30121	0.0905426	0	0.00555984	0.00275989	0.00703387	0	0	0	0	0	0	0	0	0
UW_DM_MEG1_1		0.439522	0.0733207		0	0.411307	0.0104296	0.431062	0.439522	0.167077	0.00701479	0	0	0	0	0	0	0	0	0	0	0	0	0
UW_MP_BACIL3_1		0.428348	0.023603		0.0375828	0.428348	0.00612923	0	0	0	0	0	0	0	0	0	0	0	0	0	0	0	0	0
UW_MP_STREP3_1		0.428312	0.0255276		0	0.0138333	0.00218523	0	0	0	0	0	0	0	0	0	0	0	0	0	0	0.0137111	0.428312	0.0525099
UW_MP_BURK2_1		0.414719	0.0388466		0	0	0	0	0	0	0	0	0	0	0	0	0.00626485	0.0837102	0.141874	0.0308338	0.414719	0.0554988	0.0347097	0.00932203
UW_MP_ANA2_1		0.395165	0.0262585		0	0.395165	0.116359	0.00968303	0	0.00396331	0	0	0	0	0	0	0	0	0	0	0	0	0	0
UW_MP_BACTE3_1		0.388554	0.0414264		0	0	0	0	0	0	0	0	0	0	0	0	0.323876	0.388554	0.0225404	0.00479709	0.0475322	0.024391	0.0140413	0.00279641
UW_MP_BIF7_1		0.347734	0.0575868		0	0.00369219	0	0	0	0.00979122	0.0131805	0	0.00833986	0.0149561	0.0174034	0.00875714	0.103788	0.324621	0.347734	0.100336	0.0621522	0.109734	0.0223509	0.00489897
UW_MP_CARN1_1		0.338961	0.0353617		0	0	0.00520931	0	0	0	0	0	0	0	0	0	0	0	0	0	0	0.295288	0.338961	0.0677752
UW_MP_SPHING1_1		0.335498	0.0177258		0.335498	0.0174689	0.00154859	0	0	0	0	0	0	0	0	0	0	0	0	0	0	0	0	0
UW_Xyl_COR6		0.334	0.0603338		0	0	0	0	0	0.00989053	0.0253566	0.0433806	0.210869	0.334	0.161502	0.187453	0.157389	0.0343908	0.00934015	0	0.00510552	0	0.0193688	0.00863027
UW_MP_ACID4_1		0.322984	0.0205842		0.322984	0.0860921	0.00260838	0	0	0	0	0	0	0	0	0	0	0	0	0	0	0	0	0
UW_MP_OSCL2_1		0.317997	0.0179795		0.0296241	0.317997	0.0119684	0	0	0	0	0	0	0	0	0	0	0	0	0	0	0	0	0
UW_DM_ACUT1_1		0.312082	0.100572		0	0.0750987	0.0177619	0.0268048	0	0.0329162	0.120649	0.0683928	0.186107	0.312082	0.310856	0.176169	0.111159	0.0993086	0.0172804	0.0194912	0.155315	0.0453012	0.139623	0.0971253
UW_DM_BACIL1_1		0.309122	0.0177273		0.309122	0.0421855	0.003238	0	0	0	0	0	0	0	0	0	0	0	0	0	0	0	0	0
UW_MP_BACIL4_1		0.304153	0.0200957		0	0	0	0.304153	0.0219743	0.0577639	0.0180223	0	0	0	0	0	0	0	0	0	0	0	0	0
UW_MP_OSCL1_1		0.300829	0.015851		0	0.300829	0.0161909	0	0	0	0	0	0	0	0	0	0	0	0	0	0	0	0	0
UW_MP_BACTE4_1		0.252134	0.0257672		0	0	0	0	0	0	0	0	0	0	0	0.101171	0.0872931	0.0437756	0.252134	0.030969	0	0	0	0
UW_TS_ACET5_1		0.251649	0.0529292		0	0.0202026	0.00669814	0.00787112	0	0.0267281	0.0226577	0	0.0106986	0.0195195	0.0220729	0.0900743	0.251649	0.20037	0.0728167	0.0238663	0.0811835	0.0698756	0.115343	0.0169584
UW_MP_BIF10_1		0.245831	0.0435565		0	0	0	0	0	0.013719	0.0182082	0	0.0231333	0.245831	0.0758584	0.016206	0.0250613	0.136158	0.108909	0.0480823	0.0404724	0.119492	0	0
UW_DM_LAC2_1		0.228986	0.0235431		0	0	0	0	0	0	0	0	0	0	0	0.00270356	0.0040424	0.0759601	0.0767893	0.0489251	0.228986	0.00493422	0.0234319	0.00508898
UW_DM_CLOS2_1		0.218178	0.0377625		0	0	0	0	0	0	0	0	0	0	0	0	0.0124586	0	0.178136	0.218178	0.119623	0.0391097	0.104156	0.0835889
UW_MP_LAC1_1		0.217046	0.0224423		0	0	0	0	0	0	0	0	0	0	0	0.00264651	0.00387061	0.0735153	0.0724923	0.0473145	0.217046	0.00485973	0.022301	0.00480072
UW_TS_EUB1_1		0.212951	0.0319391		0	0	0	0	0	0.21254	0.212951	0.0454194	0.0696032	0.0424424	0.025647	0.0301789	0	0	0	0	0	0	0	0
UW_TS_EGG1_1		0.210297	0.0421786		0	0	0	0	0	0.00924228	0.0260675	0.045325	0.13724	0.210297	0.0919465	0.127109	0.127565	0.0294994	0.00797102	0	0.00458511	0	0.0183365	0.00838672
UW_MP_BIF15_1		0.209497	0.0465683		0	0.00474739	0.00157866	0	0	0.019098	0.0265985	0	0.0244826	0.0268576	0.0275671	0.012761	0.0264022	0.209497	0.153987	0.0823048	0.0746256	0.19187	0.0404982	0.00848983
UW_MP_SCHLAC2_1		0.201217	0.0133644		0	0	0	0	0	0	0	0	0	0.0274831	0.201217	0.0307993	0.00355769	0.0042318	0	0	0	0	0	0
UW_Xyl_COR5		0.197847	0.0356693		0	0.0557933	0.0834375	0.0893737	0	0.163121	0.197847	0	0	0	0	0	0	0	0	0	0	0	0.0885892	0.0352246
UW_DM_LCO1_1		0.192338	0.0167614		0.192338	0.130526	0.0123647	0	0	0	0	0	0	0	0	0	0	0	0	0	0	0	0	0
UW_MP_ACUT3_1		0.178431	0.0134442		0	0	0.00631026	0.178431	0.0491939	0.0236483	0.0112996	0	0	0	0	0	0	0	0	0	0	0	0	0
UW_Xyl_COR4		0.17555	0.0245979		0	0	0	0	0	0	0	0	0	0	0	0.0456367	0.030544	0.025823	0.0225716	0.02473	0.0123416	0.00626193	0.148499	0.17555
UW_MP_MEG3_1		0.173104	0.0133855		0.00268072	0.173104	0.0919247	0	0	0	0	0	0	0	0	0	0	0	0	0	0	0	0	0
UW_MP_LAC3_1		0.163189	0.0161801		0	0	0	0	0	0	0	0	0	0	0	0	0	0.0533526	0.0524973	0.0351289	0.163189	0	0.0158619	0.00357252
UW_DM_PREV1_1		0.159295	0.00796473		0.159295	0	0	0	0	0	0	0	0	0	0	0	0	0	0	0	0	0	0	0
UW_DM_PSEUD1_1		0.144271	0.0357718		0.0213662	0	0	0	0	0	0	0	0.0355642	0.0397926	0.020436	0.0205287	0.144271	0.116398	0.0706604	0.0831043	0.0967579	0.0422139	0.0116516	0.0126909
UW_DM_ATO1_1		0.142909	0.0455253		0	0	0	0.0836592	0	0.118644	0.140838	0	0.142909	0.119878	0.0934548	0.133707	0	0	0	0	0	0	0.0472027	0.0302131
UW_MP_STREP4_1		0.136984	0.0159755		0.136984	0.00609896	0.00451913	0.0520786	0.00865079	0.0470819	0.0610812	0	0.00301579	0	0	0	0	0	0	0	0	0	0	0
UW_TS_NIT1_1		0.126094	0.00630471		0.126094	0	0	0	0	0	0	0	0	0	0	0	0	0	0	0	0	0	0	0
UW_TS_RUM1_1		0.124731	0.00623655		0.124731	0	0	0	0	0	0	0	0	0	0	0	0	0	0	0	0	0	0	0
UW_MP_CLOS2_1		0.117048	0.00848438		0	0	0	0	0	0	0	0	0	0	0	0	0.117048	0.0526398	0	0	0	0	0	0
UW_SG_COR3		0.115003	0.00575014		0	0.115003	0	0	0	0	0	0	0	0	0	0	0	0	0	0	0	0	0	0
UW_TS_ACET4_1		0.104308	0.021135		0	0.0109623	0.00373949	0.0038959	0	0.0149215	0.0130723	0	0.00506466	0.0111978	0.0109196	0.045519	0.104308	0.0797302	0.027668	0.0101096	0.0249826	0.022355	0.0286062	0.00564674
UW_DM_ACET2_1		0.103775	0.020721		0	0.010604	0.00354951	0.00374473	0	0.0152241	0.0124447	0	0.00503948	0.0109634	0.0111457	0.0451609	0.103775	0.0757606	0.0248472	0.00819611	0.025031	0.0213965	0.0318877	0.00564866
UW_TS_ACET1_1		0.0993818	0.013862		0	0	0	0	0	0	0	0	0	0	0.00389617	0.00444986	0.0291342	0.0993818	0.0491212	0.0325329	0.0177103	0.0241967	0.0116039	0.00521195
UW_DM_XAN1_1		0.0979335	0.00489667		0.0979335	0	0	0	0	0	0	0	0	0	0	0	0	0	0	0	0	0	0	0
UW_TS_TETRA1_1		0.0922631	0.00461316		0.0922631	0	0	0	0	0	0	0	0	0	0	0	0	0	0	0	0	0	0	0
UW_TS_LACCAS1_1		0.0852771	0.0160556		0	0	0.00127692	0	0	0	0	0	0	0	0.0393019	0.00901253	0.00571129	0.0225969	0.0503809	0.0194338	0.0852771	0.0772204	0.00742778	0.00347237
UW_DM_XAN2_1		0.0851637	0.00425819		0.0851637	0	0	0	0	0	0	0	0	0	0	0	0	0	0	0	0	0	0	0
UW_DM_ANA1_1		0.0660647	0.0184938		0	0	0.01236	0.0489798	0	0.0382747	0.0660647	0.0399955	0.0546907	0.0499447	0.0354172	0.0104504	0.00492472	0.00285134	0	0	0.00592199	0	0	0
UW_DM_LACCAS2_1		0.0659537	0.00696168		0	0	0	0	0	0	0	0	0	0	0.0659537	0.0241777	0.00555208	0.00419763	0	0	0.0153714	0.0239811	0	0
UW_DM_DIAL1_1		0.0534326	0.0027506		0	0.0534326	0.00157932	0	0	0	0	0	0	0	0	0	0	0	0	0	0	0	0	0
UW_TS_SAP1_1		0.0480291	0.00240145		0.0480291	0	0	0	0	0	0	0	0	0	0	0	0	0	0	0	0	0	0	0
UW_DM_FLAV1_1		0.0357416	0.00178708		0.0357416	0	0	0	0	0	0	0	0	0	0	0	0	0	0	0	0	0	0	0
UW_SG_LAC2		0.035202	0.00482243		0	0	0	0	0	0	0	0	0	0.00504888	0.034035	0.007579	0	0.0145838	0.035202	0	0	0	0	0
UW_MP_PREV7_1		0.0339506	0.00568106		0	0	0	0	0	0	0	0	0	0	0	0.0249856	0	0	0	0	0.0230751	0	0.0339506	0.03161
UW_DM_ACET1_1		0.0331049	0.00424303		0	0	0	0	0	0	0	0	0	0	0	0	0.0115704	0.0331049	0.01161	0	0.0072665	0.0127481	0.00535257	0.00320814
UW_TS_LCO3_1		0.0320732	0.00160366		0	0.0320732	0	0	0	0	0	0	0	0	0	0	0	0	0	0	0	0	0	0
UW_MP_TREP1_1		0.0298358	0.0067802		0	0	0.00608403	0.0298358	0.0215497	0.0230069	0.00746365	0	0	0	0	0.00566791	0.0154288	0.0206046	0.0059627	0	0	0	0	0
UW_DM_SCHLAC1_1		0.0253579	0.0016318		0	0	0	0	0	0	0	0	0	0.00340825	0.0253579	0.00386981	0	0	0	0	0	0	0	0
UW_MP_MEG1_1		0.0253239	0.00214863		0	0.0253239	0.00703432	0.0106144	0	0	0	0	0	0	0	0	0	0	0	0	0	0	0	0
UW_MP_MYC1_1		0.0234721	0.00359176		0	0	0	0	0	0	0	0	0	0	0	0	0	0.0157999	0.0126019	0	0.0234721	0.00586552	0.0109977	0.00309818
UW_TS_GAST1_1		0.0193641	0.000968207		0.0193641	0	0	0	0	0	0	0	0	0	0	0	0	0	0	0	0	0	0	0
UW_SG_EUB1		0.018883	0.00105839		0	0	0	0	0	0	0.018883	0	0.00228475	0	0	0	0	0	0	0	0	0	0	0
UW_TS_ACID1_1		0.0186382	0.00115765		0	0.0186382	0.00451487	0	0	0	0	0	0	0	0	0	0	0	0	0	0	0	0	0
UW_TS_ACET2_1		0.0176497	0.00223187		0	0	0	0	0	0	0	0	0	0	0	0	0	0.0176497	0.0134574	0	0.0110485	0	0	0.0024818
UW_MP_MEG5_1		0.0169043	0.00141965		0	0	0.0114888	0.0169043	0	0	0	0	0	0	0	0	0	0	0	0	0	0	0	0
UW_MP_PREV4_1		0.0130809	0.00174746		0	0	0	0	0	0	0	0	0	0	0	0	0	0	0	0	0.00991856	0	0.0119498	0.0130809
UW_MP_SELEN1_1		0.0128533	0.00125478		0.0128533	0.0122423	0	0	0	0	0	0	0	0	0	0	0	0	0	0	0	0	0	0
UW_MP_CAUL1_1		0.00967642	0.000483821		0.00967642	0	0	0	0	0	0	0	0	0	0	0	0	0	0	0	0	0	0	0
UW_TS_BUL2_1		0.00900079	0.000854966		0	0	0	0	0	0	0.00427267	0	0.00900079	0.00382587	0	0	0	0	0	0	0	0	0	0
UW_MP_LCO3_1		0.00869631	0.000434815		0.00869631	0	0	0	0	0	0	0	0	0	0	0	0	0	0	0	0	0	0	0
UW_DM_ANA2_1		0.00771775	0.00185561		0	0	0.00168656	0.00636172	0	0.00454713	0.00771775	0	0.0064638	0.00608487	0.0042504	0	0	0	0	0	0	0	0	0
UW_TS_EUB2_1		0.00596799	0.000459487		0	0	0	0	0	0	0.00596799	0	0.00322175	0	0	0	0	0	0	0	0	0	0	0
UW_DM_LENLAC1_1		0.00478986	0.000239493		0	0	0	0	0	0	0	0	0	0	0	0	0	0	0.00478986	0	0	0	0	0
UW_TS_LIMLAC1_1		0.00393403	0.000338904		0	0	0	0	0	0	0	0	0.00393403	0.00284405	0	0	0	0	0	0	0	0	0	0
UW_Xyl_LAC5_1		0.00341913	0.000327021		0	0	0	0	0	0	0	0	0.00341913	0.0031213	0	0	0	0	0	0	0	0	0	0
UW_DM_LIGLAC1_1		0.00243699	0.00012185		0	0	0	0	0	0	0	0	0	0	0	0	0	0	0	0	0	0	0	0.00243699
UW_Xyl_ACET1		0	0		0	0	0	0	0	0	0	0	0	0	0	0	0	0	0	0	0	0	0	0
UW_SG_LAC1		0	0		0	0	0	0	0	0	0	0	0	0	0	0	0	0	0	0	0	0	0	0
UW_SG_LAC3		0	0		0	0	0	0	0	0	0	0	0	0	0	0	0	0	0	0	0	0	0	0
UW_SG_LAC4		0	0		0	0	0	0	0	0	0	0	0	0	0	0	0	0	0	0	0	0	0	0
UW_Xyl_LAC6		0	0		0	0	0	0	0	0	0	0	0	0	0	0	0	0	0	0	0	0	0	0
UW_SG_LCO1		0	0		0	0	0	0	0	0	0	0	0	0	0	0	0	0	0	0	0	0	0	0
UW_Xyl_LCO2		0	0		0	0	0	0	0	0	0	0	0	0	0	0	0	0	0	0	0	0	0	0
UW_DM_ACUT2_1		0	0		0	0	0	0	0	0	0	0	0	0	0	0	0	0	0	0	0	0	0	0
UW_DM_ACUT4_1		0	0		0	0	0	0	0	0	0	0	0	0	0	0	0	0	0	0	0	0	0	0
UW_DM_BIF1_1		0	0		0	0	0	0	0	0	0	0	0	0	0	0	0	0	0	0	0	0	0	0
UW_DM_BIF2_1		0	0		0	0	0	0	0	0	0	0	0	0	0	0	0	0	0	0	0	0	0	0
UW_DM_BIF4_1		0	0		0	0	0	0	0	0	0	0	0	0	0	0	0	0	0	0	0	0	0	0
UW_DM_ENTER1_1		0	0		0	0	0	0	0	0	0	0	0	0	0	0	0	0	0	0	0	0	0	0
UW_DM_LAC3_1		0	0		0	0	0	0	0	0	0	0	0	0	0	0	0	0	0	0	0	0	0	0
UW_DM_LACCAS1_1		0	0		0	0	0	0	0	0	0	0	0	0	0	0	0	0	0	0	0	0	0	0
UW_DM_LACCAS3_1		0	0		0	0	0	0	0	0	0	0	0	0	0	0	0	0	0	0	0	0	0	0
UW_DM_LIMLAC1_1		0	0		0	0	0	0	0	0	0	0	0	0	0	0	0	0	0	0	0	0	0	0
UW_DM_LIMLAC2_1		0	0		0	0	0	0	0	0	0	0	0	0	0	0	0	0	0	0	0	0	0	0
UW_DM_LIMLAC3_1		0	0		0	0	0	0	0	0	0	0	0	0	0	0	0	0	0	0	0	0	0	0
UW_DM_LIMLAC4_1		0	0		0	0	0	0	0	0	0	0	0	0	0	0	0	0	0	0	0	0	0	0
UW_MP_ACUT4_1		0	0		0	0	0	0	0	0	0	0	0	0	0	0	0	0	0	0	0	0	0	0
UW_MP_AGRLAC1_1		0	0		0	0	0	0	0	0	0	0	0	0	0	0	0	0	0	0	0	0	0	0
UW_MP_ATO2_1		0	0		0	0	0	0	0	0	0	0	0	0	0	0	0	0	0	0	0	0	0	0
UW_MP_BACIL7_1		0	0		0	0	0	0	0	0	0	0	0	0	0	0	0	0	0	0	0	0	0	0
UW_MP_BIF12_1		0	0		0	0	0	0	0	0	0	0	0	0	0	0	0	0	0	0	0	0	0	0
UW_MP_BIF13_1		0	0		0	0	0	0	0	0	0	0	0	0	0	0	0	0	0	0	0	0	0	0
UW_MP_BIF17_1		0	0		0	0	0	0	0	0	0	0	0	0	0	0	0	0	0	0	0	0	0	0
UW_MP_BIF19_1		0	0		0	0	0	0	0	0	0	0	0	0	0	0	0	0	0	0	0	0	0	0
UW_MP_BIF3_1		0	0		0	0	0	0	0	0	0	0	0	0	0	0	0	0	0	0	0	0	0	0
UW_MP_BUL1_1		0	0		0	0	0	0	0	0	0	0	0	0	0	0	0	0	0	0	0	0	0	0
UW_MP_BUL3_1		0	0		0	0	0	0	0	0	0	0	0	0	0	0	0	0	0	0	0	0	0	0
UW_MP_BURK1_1		0	0		0	0	0	0	0	0	0	0	0	0	0	0	0	0	0	0	0	0	0	0
UW_MP_BURK4_1		0	0		0	0	0	0	0	0	0	0	0	0	0	0	0	0	0	0	0	0	0	0
UW_MP_EGG1_1		0	0		0	0	0	0	0	0	0	0	0	0	0	0	0	0	0	0	0	0	0	0
UW_MP_ENTER3_1		0	0		0	0	0	0	0	0	0	0	0	0	0	0	0	0	0	0	0	0	0	0
UW_MP_MIC1_1		0	0		0	0	0	0	0	0	0	0	0	0	0	0	0	0	0	0	0	0	0	0
UW_MP_MORAX1_1		0	0		0	0	0	0	0	0	0	0	0	0	0	0	0	0	0	0	0	0	0	0
UW_MP_MORAX2_1		0	0		0	0	0	0	0	0	0	0	0	0	0	0	0	0	0	0	0	0	0	0
UW_MP_PREV1_1		0	0		0	0	0	0	0	0	0	0	0	0	0	0	0	0	0	0	0	0	0	0
UW_MP_PREV8_1		0	0		0	0	0	0	0	0	0	0	0	0	0	0	0	0	0	0	0	0	0	0
UW_MP_PROP1_1		0	0		0	0	0	0	0	0	0	0	0	0	0	0	0	0	0	0	0	0	0	0
UW_MP_STREP2_1		0	0		0	0	0	0	0	0	0	0	0	0	0	0	0	0	0	0	0	0	0	0
UW_TS_ACET3_1		0	0		0	0	0	0	0	0	0	0	0	0	0	0	0	0	0	0	0	0	0	0
UW_TS_ACET6_1		0	0		0	0	0	0	0	0	0	0	0	0	0	0	0	0	0	0	0	0	0	0
UW_TS_ANEURI1_1		0	0		0	0	0	0	0	0	0	0	0	0	0	0	0	0	0	0	0	0	0	0
UW_TS_BAC1_1		0	0		0	0	0	0	0	0	0	0	0	0	0	0	0	0	0	0	0	0	0	0
UW_TS_BAC2_1		0	0		0	0	0	0	0	0	0	0	0	0	0	0	0	0	0	0	0	0	0	0
UW_TS_BUL1_1		0	0		0	0	0	0	0	0	0	0	0	0	0	0	0	0	0	0	0	0	0	0
UW_TS_CLOS1_1		0	0		0	0	0	0	0	0	0	0	0	0	0	0	0	0	0	0	0	0	0	0
UW_TS_COMLAC1_1		0	0		0	0	0	0	0	0	0	0	0	0	0	0	0	0	0	0	0	0	0	0
UW_TS_FURLAC1_1		0	0		0	0	0	0	0	0	0	0	0	0	0	0	0	0	0	0	0	0	0	0
UW_TS_LAC1_1		0	0		0	0	0	0	0	0	0	0	0	0	0	0	0	0	0	0	0	0	0	0
UW_TS_LAC2_1		0	0		0	0	0	0	0	0	0	0	0	0	0	0	0	0	0	0	0	0	0	0
UW_TS_LAC3_1		0	0		0	0	0	0	0	0	0	0	0	0	0	0	0	0	0	0	0	0	0	0
UW_TS_LAC4_1		0	0		0	0	0	0	0	0	0	0	0	0	0	0	0	0	0	0	0	0	0	0
UW_TS_LAC5_1		0	0		0	0	0	0	0	0	0	0	0	0	0	0	0	0	0	0	0	0	0	0
UW_TS_LAC6_1		0	0		0	0	0	0	0	0	0	0	0	0	0	0	0	0	0	0	0	0	0	0
UW_TS_LACCAS2_1		0	0		0	0	0	0	0	0	0	0	0	0	0	0	0	0	0	0	0	0	0	0
UW_TS_LACPLAN1_1		0	0		0	0	0	0	0	0	0	0	0	0	0	0	0	0	0	0	0	0	0	0
UW_TS_LCO1_1		0	0		0	0	0	0	0	0	0	0	0	0	0	0	0	0	0	0	0	0	0	0
UW_TS_LCO2_1		0	0		0	0	0	0	0	0	0	0	0	0	0	0	0	0	0	0	0	0	0	0
UW_TS_LCO4_1		0	0		0	0	0	0	0	0	0	0	0	0	0	0	0	0	0	0	0	0	0	0
UW_TS_LCO5_1		0	0		0	0	0	0	0	0	0	0	0	0	0	0	0	0	0	0	0	0	0	0
UW_TS_LEVLAC1_1		0	0		0	0	0	0	0	0	0	0	0	0	0	0	0	0	0	0	0	0	0	0
UW_TS_LIMLAC2_1		0	0		0	0	0	0	0	0	0	0	0	0	0	0	0	0	0	0	0	0	0	0
UW_TS_PAENI1_1		0	0		0	0	0	0	0	0	0	0	0	0	0	0	0	0	0	0	0	0	0	0
UW_TS_PED1_1		0	0		0	0	0	0	0	0	0	0	0	0	0	0	0	0	0	0	0	0	0	0
UW_TS_PED2_1		0	0		0	0	0	0	0	0	0	0	0	0	0	0	0	0	0	0	0	0	0	0
UW_TS_PED3_1		0	0		0	0	0	0	0	0	0	0	0	0	0	0	0	0	0	0	0	0	0	0

[truncated: 3 more sheets: Table S7, Table S8, Table S9]
